# Supplementary material for: Repurposing anthelmintic agents to eradicate resistant leukemia
Source: PubMed Central journal article supplement (PMC7320149; doi:10.1038/s41408-020-0339-9), 2020-06-26
Supplement: 41408_2020_339_MOESM2_ESM.pdf [file 41408_2020_339_MOESM2_ESM.pdf]

**Supplementary Table S1:** Antibodies, chemicals, and reagents

| REAGENT or RESOURCE           | SOURCE                   | IDENTIFIER |
|-------------------------------|--------------------------|------------|
| <b>Antibodies</b>             |                          |            |
| rabbit anti-Caspase 3         | Cell Signaling           | 9662       |
| rabbit anti-Caspase 7         | Cell Signaling           | 9492       |
| mouse anti-Caspase 2          | Cell Signaling           | 2224       |
| rabbit anti-Caspase 6         | Cell Signaling           | 9762       |
| mouse anti-Tubulin            | Sigma Aldrich            | T9026      |
| mouse anti-RIPK1              | BD Pharmingen            | 51-6559GR  |
| hCD19-PE-Cy7                  | Biolegend                | 302208     |
| hCD45-Alexa Fluor 647         | Biolegend                | 304018     |
| anti-mouse IgG HRP            | Cell Signaling           | 7076       |
| anti-rabbit IgG HRP           | Cell Signaling           | 7074       |
| <b>Chemicals and reagents</b> |                          |            |
| Drug library                  | NEXUS platform ETH       |            |
| Z-VAD-FMK                     | Selleckchem              | S7023      |
| Necrostatin-1s                | Bio Vision               | 2263-1     |
| Chloroquine                   | Sigma Aldrich            | C1650000   |
| Bafilomycin                   | Selleckchem              | S1413      |
| Moxidectin                    | Sigma Aldrich            | 33746      |
| Ivermectin                    | Selleckchem              | S1351      |
| Milbemycin                    | Sigma Aldrich            | Y0001882   |
| ABT-263                       | Selleckchem              | S1001      |
| Dexamethasone                 | Selleckchem              | S1322      |
| TMRE                          | Thermo Fisher Scientific | T669       |
| MQAE                          | Thermo Fisher Scientific | E3101      |
| CyQUANT                       | Thermo Fisher Scientific | C35012     |
| AIM-V                         | Thermo Fisher Scientific | 12055083   |
