# Supplementary material for: Repurposing anthelmintic agents to eradicate resistant leukemia
Source: PubMed Central journal article supplement (PMC7320149; doi:10.1038/s41408-020-0339-9), 2020-06-26
Supplement: 41408_2020_339_MOESM3_ESM.pdf [file 41408_2020_339_MOESM3_ESM.pdf]

Supplementary Table S2: Statistical analysis and drug list of the 2487 FDA-approved compounds screened

| Raw      | Norm     | Cor.loess   | % Cor.loess | Z        | Pval     | Padj     | Drug_name                                                   |
|----------|----------|-------------|-------------|----------|----------|----------|-------------------------------------------------------------|
| 5.759668 | 1.205661 | 1.451110951 | 145.1110951 | 27.44886 | 0        | 5.60E-15 | DOXORUBICIN                                                 |
| 5.78746  | 1.159104 | 1.43015272  | 143.015272  | 112.0519 | 0        | 5.60E-15 | BENZETHONIUM CHLORIDE                                       |
| 5.774727 | 1.124451 | 1.35592602  | 135.592602  | 37.7659  | 0        | 5.60E-15 | MITOXANTRONE HYDROCHLORIDE                                  |
| 5.819544 | 1.067751 | 1.30715907  | 130.715907  | 104.2611 | 0        | 5.60E-15 | DAUNORUBICIN HYDROCHLORIDE                                  |
| 5.883762 | 0.938997 | 1.25286821  | 125.286821  | 21.07088 | 0        | 5.60E-15 | Idarubicin HCl                                              |
| 5.835056 | 1.053002 | 1.246864123 | 124.6864123 | 23.58538 | 0        | 5.60E-15 | DACTINOMYCIN                                                |
| 5.960946 | 0.788341 | 1.019427228 | 101.9427228 | 39.17396 | 0        | 5.60E-15 | QUABAIN OCTAHYDRATE                                         |
| 5.97635  | 0.756611 | 1.017156375 | 101.7156375 | 79.69378 | 0        | 5.60E-15 | COLCHICINE                                                  |
| 5.937016 | 0.832605 | 1.015791721 | 101.5791721 | 22.17391 | 0        | 5.60E-15 | Dinacilidib (SCH727965)                                     |
| 5.972203 | 0.765447 | 1.014244323 | 101.4244323 | 79.46563 | 0        | 5.60E-15 | DIGOXIN                                                     |
| 6.017033 | 0.674257 | 0.992634967 | 99.2634967  | 21.99658 | 0        | 5.60E-15 | MLN9708                                                     |
| 5.960946 | 0.78505  | 0.982834237 | 98.2834237  | 21.45447 | 0        | 5.60E-15 | Flavopiridol (Alvocidib)                                    |
| 5.921111 | 0.723117 | 0.961519902 | 96.1519902  | 20.9892  | 0        | 5.60E-15 | Carfilzomib (PR-171)                                        |
| 5.922808 | 0.863891 | 0.960692702 | 96.0692702  | 21.28875 | 0        | 5.60E-15 | Romidepsin (FK228, Depsipeptide)                            |
| 5.992554 | 0.703559 | 0.924315502 | 92.4315502  | 25.33536 | 0        | 5.60E-15 | SELAMECTIN                                                  |
| 6.089905 | 0.517448 | 0.895854365 | 89.5854365  | 19.85194 | 0        | 5.60E-15 | Ocetinidie                                                  |
| 6.029384 | 0.659496 | 0.860263327 | 86.0263327  | 16.27253 | 0        | 5.60E-15 | VINCRIStINE SULFATE                                         |
| 5.966142 | 0.774725 | 0.845579913 | 84.5579913  | 16.45832 | 0        | 5.60E-15 | Bortezomib (PS-341)                                         |
| 6.071882 | 0.563695 | 0.83053375  | 83.053375   | 32.26494 | 0        | 5.60E-15 | CETRIMONIUM BROMIDE                                         |
| 6.003422 | 0.50962  | 0.82872777  | 82.872777   | 13.93966 | 0        | 5.60E-15 | Fosbretabulin (Combretastatin A4 Phosphate (CA4P)) Disodium |
| 6.060698 | 0.596086 | 0.815174089 | 81.5174089  | 15.41963 | 0        | 5.60E-15 | IVERMECTIN                                                  |
| 6.071882 | 0.564592 | 0.80746282  | 80.746282   | 17.62626 | 0        | 5.60E-15 | CEP-18770 (Delanzomib)                                      |
| 5.977266 | 0.752618 | 0.803035687 | 80.3035687  | 17.52962 | 0        | 5.60E-15 | MLN2238                                                     |
| 6.064458 | 0.588472 | 0.801376916 | 80.1376916  | 15.15865 | 0        | 5.60E-15 | PODOFILOX                                                   |
| 6.089905 | 0.514643 | 0.781335047 | 78.1335047  | 61.21728 | 0        | 5.60E-15 | CETYLPYRIDINIUM CHLORIDE                                    |
| 6.093422 | 0.532859 | 0.765995725 | 76.5995725  | 16.33613 | 0        | 5.60E-15 | PUROMYCIN DIHYDROCHLORIDE                                   |
| 6.045323 | 0.630458 | 0.732303199 | 73.2303199  | 15.61758 | 0        | 5.60E-15 | VINBLASTINE SULFATE                                         |
| 6.100371 | 0.507978 | 0.723091846 | 72.3091846  | 15.78451 | 0        | 5.60E-15 | Bardoxolone Methyl                                          |
| 6.049218 | 0.609631 | 0.718040585 | 71.8040585  | 15.67424 | 0        | 5.60E-15 | Vinorelbine Tartrate                                        |
| 6.11059  | 0.48767  | 0.704435756 | 70.4435756  | 15.37726 | 0        | 5.60E-15 | Quisinosat (JNJ-26481585)                                   |
| 6.133539 | 0.421666 | 0.669922183 | 66.9922183  | 52.48813 | 0        | 5.60E-15 | GENTIAN VIOLET                                              |
| 6.133539 | 0.423554 | 0.651510268 | 65.1510268  | 14.43733 | 0        | 5.60E-15 | Homoharringtonine                                           |
| 6.0068   | 0.690349 | 0.643561298 | 64.3561298  | 14.04842 | 0        | 5.60E-15 | ABT-203 (Navitoclax)                                        |
| 6.053336 | 0.407227 | 0.642100706 | 64.2100706  | 13.69396 | 0        | 5.60E-15 | THIMEROSAL                                                  |
| 6.155336 | 0.37522  | 0.629812773 | 62.9812773  | 49.34557 | 0        | 5.60E-15 | DIGITOXIN                                                   |
| 6.190332 | 0.329202 | 0.583973851 | 58.3973851  | 12.74767 | 0        | 5.60E-15 | ABT-199 (GDC-0199)                                          |
| 6.190332 | 0.333583 | 0.536040796 | 53.6040796  | 10.13962 | 0        | 5.60E-15 | MOXIDECTIN                                                  |
| 6.255273 | 0.161601 | 0.527174052 | 52.7174052  | 11.68207 | 0        | 5.60E-15 | Pixantrone dimaleate                                        |
| 6.181844 | 0.318736 | 0.526737437 | 52.6737437  | 41.26966 | 0        | 5.60E-15 | GRAMICIDIN (gramicidin A shown)                             |
| 6.217484 | 0.28112  | 0.515946929 | 51.5946929  | 11.00342 | 0        | 5.60E-15 | LANATOSIDE C                                                |
| 6.220108 | 0.237201 | 0.506032072 | 50.6032072  | 39.64741 | 0        | 5.60E-15 | EMETINE DIHYDROCHLORIDE                                     |
| 6.220108 | 0.258362 | 0.494729901 | 49.4729901  | 13.56048 | 0        | 5.60E-15 | AMSACRINE                                                   |
| 6.190332 | 0.316618 | 0.494051791 | 49.4051791  | 13.54189 | 0        | 5.60E-15 | CHLOROXINE                                                  |
| 6.149219 | 0.389813 | 0.48484023  | 48.484023   | 10.74396 | 0        | 5.60E-15 | 10-Hydroxycamptothecin                                      |
| 6.267172 | 0.135964 | 0.478914123 | 47.8914123  | 8.055601 | 8.88E-16 | 2.22E-14 | CHLOROTHALONIL                                              |
| 6.209515 | 0.29729  | 0.477479943 | 47.7479943  | 10.18305 | 0        | 5.60E-15 | PHENYLMERCURIC ACETATE                                      |
| 6.232996 | 0.244417 | 0.474998632 | 47.4998632  | 10.36883 | 0        | 5.60E-15 | YM155 (Sepantronium Bromide)                                |
| 6.260071 | 0.151233 | 0.462760435 | 46.2760435  | 7.78387  | 7.11E-15 | 1.68E-13 | Domiphen Bromide                                            |
| 6.240549 | 0.193644 | 0.453255041 | 45.3255041  | 35.51235 | 0        | 5.60E-15 | PYRITHIONE ZINC                                             |
| 6.243038 | 0.213501 | 0.43867357  | 43.867357   | 12.02398 | 0        | 5.60E-15 | METHYLBENZETHONIUM CHLORIDE                                 |
| 6.227887 | 0.243144 | 0.436934812 | 43.6934812  | 11.97632 | 0        | 5.60E-15 | FENFLURIDOL                                                 |
| 6.220108 | 0.270028 | 0.425281352 | 42.5281352  | 9.283546 | 0        | 5.60E-15 | Panobinostat (LBH589)                                       |
| 6.262451 | 0.187544 | 0.397260322 | 39.7260322  | 7.514479 | 5.71E-14 | 1.25E-12 | DI-O-DEMETHYLCURCUMIN                                       |
| 6.281033 | 0.148954 | 0.379073969 | 37.9073969  | 8.274876 | 2.22E-16 | 5.60E-15 | Birinapant                                                  |
| 6.292256 | 0.126652 | 0.365755471 | 36.5755471  | 7.984144 | 1.33E-15 | 3.26E-14 | TG101348 (SAR302503)                                        |
| 6.285557 | 0.139964 | 0.344655084 | 34.4655084  | 7.52354  | 5.33E-14 | 1.18E-12 | Pelitinib (EKB-569)                                         |
| 6.294466 | 0.112885 | 0.341617201 | 34.1617201  | 9.36368  | 0        | 5.60E-15 | DRONEDARONE HYDROCHLORIDE                                   |
| 6.290035 | 0.131066 | 0.340285898 | 34.0285898  | 7.428164 | 1.10E-13 | 2.40E-12 | Dacomitinib (PF299804, PF299)                               |
| 6.322219 | 0.056759 | 0.333826341 | 33.3826341  | 12.82805 | 0        | 5.60E-15 | TYLOXAPOL                                                   |
| 6.238046 | 0.19867  | 0.33062738  | 33.062738   | 7.326633 | 2.36E-13 | 4.93E-12 | Milbemycin                                                  |
| 6.322219 | 0.056759 | 0.311805903 | 31.1805903  | 11.98187 | 0        | 5.60E-15 | Oxaliplatin                                                 |
| 6.338456 | 0.023878 | 0.292442096 | 29.2442096  | 11.23777 | 0        | 5.60E-15 | EPIDRUBICIN HYDROCHLORIDE                                   |
| 6.352183 | 0.00392  | 0.289602739 | 28.9602739  | 11.12866 | 0        | 5.60E-15 | ANCIPTABINE HYDROCHLORIDE                                   |
| 6.227887 | 0.25457  | 0.28140822  | 28.140822   | 8.142913 | 8.10E-10 | 1.28E-08 | Napabucasin                                                 |
| 6.340444 | 0.03089  | 0.259198563 | 25.9198563  | 5.658094 | 1.53E-08 | 2.08E-07 | AT13387                                                     |
| 6.252853 | 0.20698  | 0.257881287 | 25.7881287  | 4.87802  | 1.07E-06 | 1.16E-05 | TRAMADOL HYDROCHLORIDE                                      |
| 6.348305 | 0.015268 | 0.254767996 | 25.4767996  | 5.561378 | 2.68E-08 | 3.49E-07 | Ganetespib (STA-9090)                                       |
| 6.318063 | 0.065174 | 0.254342317 | 25.4342317  | 9.773695 | 0        | 5.60E-15 | SALINOMYCIN, SODIUM                                         |
| 6.257679 | 0.195366 | 0.245840378 | 24.5840378  | 5.366496 | 8.03E-08 | 9.93E-07 | Nintedanib (BIBF 1120)                                      |
| 6.305351 | 0.091589 | 0.23186097  | 23.186097   | 6.355277 | 2.08E-10 | 3.44E-09 | BENZALKONIUM CHLORIDE HYDRATE                               |
| 6.338454 | -0.11488 | 0.230700566 | 23.0700566  | 3.880512 | 0.000104 | 0.000787 | Misoprostol                                                 |
| 6.334454 | 0.043773 | 0.230281609 | 23.0281609  | 4.911137 | 9.05E-07 | 9.93E-06 | PYRINIUM PAMOATE                                            |
| 6.361728 | -0.01141 | 0.225194594 | 22.5194594  | 4.915815 | 8.84E-07 | 9.71E-06 | GSK2126458 (GSK458)                                         |
| 6.399674 | -0.14899 | 0.223770529 | 22.3770529  | 3.763944 | 0.000167 | 0.00122  | GEMCITABINE HYDROCHLORIDE                                   |
| 6.294466 | 0.077286 | 0.221962789 | 22.1962789  | 3.733537 | 0.000189 | 0.001369 | THYMOPENTIN                                                 |
| 6.359635 | -0.00966 | 0.218982718 | 21.8982718  | 4.14224  | 3.44E-05 | 0.00029  | EPIDRUBICIN HYDROCHLORIDE                                   |
| 6.357935 | 0.01537  | 0.21237237  | 21.237237   | 3.60966  | 2.22E-16 | 5.60E-15 | HOMIDIUM BROMIDE                                            |
| 6.354108 | -0.00782 | 0.199775383 | 19.9775383  | 7.676833 | 1.62E-14 | 3.70E-13 | ETHACRIDINE LACTATE                                         |
| 6.365488 | -0.07258 | 0.195694479 | 19.5694479  | 15.33258 | 0        | 5.60E-15 | CYTARABINE                                                  |
| 6.334454 | 0.042794 | 0.195120631 | 19.5120631  | 4.259325 | 2.05E-05 | 0.000182 | Volasertib (BI 6727)                                        |
| 6.354108 | 0.003735 | 0.19369457  | 19.369457   | 4.228195 | 2.36E-05 | 0.000207 | GDC-0941                                                    |
| 6.340444 | -0.02161 | 0.193284852 | 19.3284852  | 3.251158 | 0.001149 | 0.007031 | PIRFENIDONE                                                 |
| 6.38739  | -0.06891 | 0.192164774 | 19.2164774  | 5.26721  | 1.39E-07 | 1.67E-06 | TOPOTECAN HYDROCHLORIDE                                     |
| 6.307496 | 0.096366 | 0.189434423 | 18.9434423  | 4.135199 | 3.55E-05 | 0.000298 | Rigosertib (ON-01910)                                       |
| 6.342423 | 0.025605 | 0.18918344  | 18.918344   | 3.578548 | 0.000346 | 0.002362 | PARAMETHADIONE                                              |
| 6.396674 | -0.09033 | 0.186264266 | 18.6264266  | 3.523329 | 0.000426 | 0.002863 | ACRIFLAVINIUM HYDROCHLORIDE                                 |
| 6.385606 | -0.0716  | 0.18288642  | 18.288642   | 7.027836 | 2.10E-12 | 4.02E-11 | TRICHLORMETHINE HYDROCHLORIDE                               |
| 6.348305 | -0.03597 | 0.18027819  | 18.027819   | 14.12472 | 0        | 5.60E-15 | AMODIAQUINE DIHYDROCHLORIDE                                 |
| 6.357935 | -0.05649 | 0.179785362 | 17.9785362  | 14.08611 | 0        | 5.60E-15 | MITOMYCIN                                                   |
| 6.390935 | -0.07585 | 0.177481692 | 17.7481692  | 4.864748 | 1.15E-06 | 1.24E-05 | HYDROQUINONE                                                |
| 6.395488 | -0.03086 | 0.174346109 | 17.4346109  | 4.230469 | 1.18E-11 | 2.11E-10 | URAPIDIL HYDROCHLORIDE                                      |
| 6.40824  | -0.10384 | 0.176374332 | 17.6374332  | 3.850108 | 0.000118 | 0.000886 | Neratinib (HKI-272)                                         |
| 6.4133   | -0.11792 | 0.176345754 | 17.6345754  | 3.335713 | 0.000851 | 0.00538  | EVANS BLUE                                                  |
| 6.385606 | -0.05886 | 0.17031107  | 17.031107   | 3.717752 | 0.000201 | 0.001452 | Sotagliflozin (LX4211)                                      |
| 6.385606 | -0.05886 | 0.168288745 | 16.8288745  | 3.673606 | 0.000239 | 0.001696 | Cerenololol (CP-868596)                                     |
| 6.352183 | 0.007562 | 0.165710461 | 16.5710461  | 3.617325 | 0.000298 | 0.002074 | Dovitinib (TKI-258, CHR-258)                                |
| 6.409933 | -0.1111  | 0.16385167  | 16.385167   | 3.099378 | 0.001939 | 0.011045 | PHTHALYL SULFACETAMIDE                                      |
| 6.392697 | -0.0762  | 0.163409719 | 16.3409719  | 3.091018 | 0.001995 | 0.011323 | METHYLENE BLUE                                              |
| 6.374748 | -0.04418 | 0.16232216  | 16.232216   | 4.449228 | 8.62E-06 | 8.10E-05 | THIRAM                                                      |
| 6.437751 | -0.17719 | 0.161031961 | 16.1031961  | 6.188027 | 6.09E-10 | 9.81E-09 | TIRATRICOL                                                  |
| 6.382017 | -0.05173 | 0.15980301  | 15.980301   | 3.48837  | 0.000486 | 0.003215 | PCI-24781 (Abexinostat)                                     |
| 6.369216 | -0.03336 | 0.159763348 | 15.9763348  | 4.379091 | 1.19E-05 | 0.00011  | PERHEXILINE MALEATE                                         |
| 6.376577 | -0.      |             |             |          |          |          |                                                             |

|          |           |              |             |          |          |          |                                             |
|----------|-----------|--------------|-------------|----------|----------|----------|---------------------------------------------|
| 6.389166 | -0.06725  | 0.1331293316 | 13.31293316 | 2.839204 | 0.004523 | 0.022547 | TRIPLENNAMINE CITRATE                       |
| 6.378398 | -0.04724  | 0.133031954  | 13.30319539 | 2.5164   | 0.011856 | 0.049513 | FESOTERODINE FUMARATE                       |
| 6.431364 | -0.21714  | 0.132757069  | 13.27570694 | 2.233048 | 0.025546 | 0.089524 | Voxalisib (XL765, SAR245409)                |
| 6.432969 | -0.15775  | 0.132614576  | 13.26145757 | 2.508505 | 0.012124 | 0.050346 | NALBUPHINE HYDROCHLORIDE                    |
| 6.40654  | -0.16006  | 0.132394244  | 13.23942438 | 10.37303 | 0        | 5.60E-15 | PROMAZINE HYDROCHLORIDE                     |
| 6.356026 | -0.00194  | 0.13230206   | 13.23020604 | 2.502594 | 0.012329 | 0.051112 | CARAZOLOL                                   |
| 6.41162  | -0.11342  | 0.132084567  | 13.2084567  | 3.620499 | 0.000294 | 0.020254 | CLOSTRYAZOL                                 |
| 6.361728 | -0.01349  | 0.132009848  | 13.2009848  | 2.497026 | 0.012523 | 0.051748 | ANTIMONY POTASSIUM TARTRATE TRIHYDRATE      |
| 6.389216 | -0.08052  | 0.129848521  | 12.98485212 | 10.14506 | 0        | 5.60E-15 | SANGUINARIUM CHLORIDE                       |
| 6.401401 | -0.09207  | 0.129337528  | 12.93375282 | 2.758337 | 0.00581  | 0.027621 | FLUNARIZINE HYDROCHLORIDE                   |
| 6.396199 | -0.08152  | 0.129336419  | 12.93364185 | 2.758314 | 0.00581  | 0.027621 | IODOFORM                                    |
| 6.352183 | -0.04423  | 0.129114271  | 12.91142711 | 10.11605 | 0        | 5.60E-15 | CHLORTETRACYCLINE HYDROCHLORIDE             |
| 6.41133  | -0.11622  | 0.129087724  | 12.90877239 | 2.75301  | 0.005905 | 0.02793  | IDOXURIDINE                                 |
| 6.424882 | -0.13691  | 0.128524115  | 12.85241152 | 2.805577 | 0.005023 | 0.024468 | S-Ruxolitinib (INCB018424)                  |
| 6.41162  | -0.11281  | 0.128017683  | 12.80176833 | 2.73019  | 0.00633  | 0.029624 | ECONAZOLE NITRATE                           |
| 6.432969 | -0.16751  | 0.127967743  | 12.79677431 | 4.917458 | 8.77E-07 | 9.65E-06 | CAMYLOFINE DIHYDROCHLORIDE                  |
| 6.40824  | -0.16741  | 0.127141193  | 12.71411929 | 2.138585 | 0.032469 | 0.10788  | ADEFOSIV DIPIVOXYL                          |
| 6.378398 | -0.10323  | 0.126604023  | 12.66040231 | 2.12955  | 0.033209 | 0.109767 | TAZOBACTAM                                  |
| 6.399674 | -0.08857  | 0.126363003  | 12.63630003 | 2.694901 | 0.007041 | 0.032303 | CYCLOSPORINE                                |
| 6.399674 | -0.08857  | 0.126290357  | 12.62903567 | 2.693351 | 0.007074 | 0.032407 | CINTRIAMIDE                                 |
| 6.385606 | -0.06184  | 0.126282085  | 12.62820847 | 2.388721 | 0.016907 | 0.066579 | UNDECYLENIC ACID                            |
| 6.429752 | -0.21367  | 0.125197398  | 12.51973981 | 2.10589  | 0.035214 | 0.114838 | Narintinib                                  |
| 6.424882 | -0.13691  | 0.125193489  | 12.5193489  | 2.687249 | 0.007204 | 0.032907 | Defactinib (VS-6063, PF-04554878)           |
| 6.431364 | -0.21732  | 0.122761903  | 12.27619025 | 2.720378 | 0.006521 | 0.030296 | Imnotecan-HCl                               |
| 6.403121 | -0.10707  | 0.121733183  | 12.17331833 | 4.677881 | 2.90E-06 | 2.92E-05 | MEPARFYLON                                  |
| 6.447158 | -0.2511   | 0.121707624  | 12.17076245 | 2.04719  | 0.040639 | 0.129319 | Dacarbazine                                 |
| 6.40654  | -0.1025   | 0.121512638  | 12.15126376 | 2.591459 | 0.009557 | 0.041538 | DIPERODON HYDROCHLORIDE                     |
| 6.41133  | -0.17829  | 0.121319724  | 12.13197239 | 2.040665 | 0.041284 | 0.13072  | PHENYLALANINE (L) HYDROCHLORIDE             |
| 6.396199 | -0.08615  | 0.121164657  | 12.1164657  | 3.321106 | 0.000897 | 0.005628 | TENIPOSIDE                                  |
| 6.390935 | -0.13032  | 0.120911044  | 12.09110437 | 2.679363 | 0.007376 | 0.03357  | Abiraterone Acetate                         |
| 6.444045 | -0.24441  | 0.120424856  | 12.04248557 | 2.025613 | 0.042804 | 0.134536 | Palbociclib (PD-0332991) HCl                |
| 6.414973 | -0.18205  | 0.120289782  | 12.02897819 | 2.665596 | 0.007685 | 0.034656 | Efidonipid(NZ-105)                          |
| 6.409933 | -0.10939  | 0.119446536  | 11.94465363 | 2.547396 | 0.010853 | 0.046384 | AMINACRINE                                  |
| 6.38739  | -0.06364  | 0.118377536  | 11.83775357 | 2.524597 | 0.011583 | 0.04867  | YOHIMBINE HYDROCHLORIDE                     |
| 6.348305 | -0.03597  | 0.117668046  | 11.76680462 | 9.219243 | 0        | 5.60E-15 | GRISEOFULVIN                                |
| 6.403121 | -0.09969  | 0.117204952  | 11.72049517 | 3.212571 | 0.001316 | 0.007862 | OCTINOXATE                                  |
| 6.453118 | -0.26496  | 0.116992795  | 11.69927952 | 2.525236 | 0.009527 | 0.041488 | Moxifloxacin HCl                            |
| 6.416641 | -0.123    | 0.115962125  | 11.59621253 | 2.473085 | 0.013395 | 0.054475 | EPRINOMECTIN                                |
| 6.457882 | -0.21796  | 0.11593197   | 11.59319696 | 4.454955 | 8.39E-06 | 7.91E-05 | ARTENIMOL                                   |
| 6.403121 | -0.09969  | 0.115928426  | 11.59284262 | 3.177582 | 0.001485 | 0.00877  | OXIBENDAZOLE                                |
| 6.454845 | -0.26763  | 0.115347138  | 11.53471384 | 1.940203 | 0.052355 | 0.153306 | Miglustat (N-Butyldeoxyynjirmycin) HCl      |
| 6.403121 | -0.09556  | 0.115009108  | 11.50091084 | 2.45276  | 0.014176 | 0.057217 | PROPARACAINE HYDROCHLORIDE                  |
| 6.394452 | -0.13789  | 0.114023076  | 11.40230757 | 2.526727 | 0.011513 | 0.048436 | Disopyramide                                |
| 6.389166 | -0.07881  | 0.113642141  | 11.36421411 | 4.369663 | 1.26E-05 | 0.000115 | CINCHONIDINE                                |
| 6.456366 | -0.27091  | 0.113106276  | 11.31062763 | 1.90251  | 0.057104 | 0.164811 | Citalopram-Hbr                              |
| 6.41162  | -0.17484  | 0.112334449  | 11.23344899 | 2.489308 | 0.012799 | 0.052678 | Etofylline                                  |
| 6.418301 | -0.12637  | 0.111770197  | 11.17701971 | 2.383685 | 0.01714  | 0.066283 | ETOPOSIDE                                   |
| 6.376577 | -0.04092  | 0.111213469  | 11.12134694 | 2.4277   | 0.015195 | 0.060309 | Dasatinib                                   |
| 6.414973 | -0.17803  | 0.110916062  | 11.0916062  | 8.690228 | 0        | 5.60E-15 | METHOTREXATE HYDRATE                        |
| 6.378398 | -0.05132  | 0.110778184  | 11.07781841 | 3.036415 | 0.002394 | 0.013138 | MONOBENZONE                                 |
| 6.344392 | 0.023044  | 0.110225135  | 11.02251347 | 2.406125 | 0.016123 | 0.053401 | Selumetinib (AZD6244)                       |
| 6.404834 | -0.15642  | 0.110135084  | 11.01350842 | 8.629037 | 0        | 5.60E-15 | DYCLONINE HYDROCHLORIDE                     |
| 6.385606 | -0.11886  | 0.110062181  | 11.00621811 | 2.438955 | 0.01473  | 0.058919 | Sulfafalen                                  |
| 6.416641 | -0.12614  | 0.109571722  | 10.95717218 | 3.003346 | 0.00267  | 0.014437 | PRAMIPEXOLE DIHYDROCHLORIDE                 |
| 6.426511 | -0.14545  | 0.109374653  | 10.9374653  | 2.997944 | 0.002718 | 0.014634 | APRAMYCIN SULFATE                           |
| 6.380211 | -0.04814  | 0.109164222  | 10.91642221 | 2.382966 | 0.017174 | 0.066312 | KPT-330                                     |
| 6.38739  | -0.11925  | 0.109082408  | 10.90824081 | 8.546562 | 0        | 5.60E-15 | BACITRACIN                                  |
| 6.389166 | -0.07881  | 0.10893608   | 10.893608   | 4.186122 | 2.84E-05 | 0.000243 | CINOCETRAMIDE                               |
| 6.41162  | -0.11281  | 0.108867815  | 10.88678149 | 3.217187 | 0.020244 | 0.075254 | LOFEXIDINE HYDROCHLORIDE                    |
| 6.40824  | -0.10971  | 0.108474843  | 10.84748435 | 2.97328  | 0.002946 | 0.015649 | ANETHOLE                                    |
| 6.416641 | -0.12614  | 0.108225802  | 10.82258023 | 2.966454 | 0.003013 | 0.015967 | PIMOBENDAN                                  |
| 6.409933 | -0.17121  | 0.107936774  | 10.7936774  | 2.391856 | 0.016763 | 0.06532  | Ubenimex                                    |
| 6.403121 | -0.15277  | 0.107906914  | 10.79069138 | 8.454462 | 0        | 5.60E-15 | MECHLORETHAMINE                             |
| 6.40824  | -0.10395  | 0.107488576  | 10.74885759 | 2.292372 | 0.021884 | 0.079806 | CANRETOXIC ACID, POTASSIUM SALT             |
| 6.404834 | -0.10304  | 0.107376382  | 10.73763817 | 2.943172 | 0.003249 | 0.017077 | SUMATRIPTAN                                 |
| 6.395606 | -0.0716   | 0.107187716  | 10.71877156 | 4.118937 | 3.81E-05 | 0.000318 | SULFAPYRAZOLE                               |
| 6.429752 | -0.14659  | 0.107053413  | 10.70534131 | 3.336889 | 0.019445 | 0.072983 | CUDC-101                                    |
| 6.424882 | -0.13691  | 0.106353432  | 10.63534319 | 3.321609 | 0.020254 | 0.075254 | Moldustat (BAY 85-3934)                     |
| 6.414973 | -0.11961  | 0.105922479  | 10.59224789 | 2.258973 | 0.023885 | 0.084907 | NIFURSOL                                    |
| 6.394452 | -0.1343   | 0.105493413  | 10.54934132 | 8.265366 | 2.22E-16 | 5.60E-15 | OXYBENZONE                                  |
| 6.419956 | -0.12712  | 0.105261716  | 10.5261716  | 2.297778 | 0.021574 | 0.078901 | Ponatinib (AP24534)                         |
| 6.450249 | -0.2025   | 0.105258396  | 10.52583959 | 4.044799 | 5.24E-05 | 0.000423 | NIFUROXAZIDE                                |
| 6.409933 | -0.12086  | 0.105153261  | 10.51532607 | 4.040758 | 5.33E-05 | 0.000429 | FAMPROFAZONE                                |
| 6.40824  | -0.16368  | 0.105053518  | 10.50535183 | 8.2309   | 2.22E-16 | 5.60E-15 | PROCAINE HYDROCHLORIDE                      |
| 6.444045 | -0.24461  | 0.10467894   | 10.46789398 | 2.319663 | 0.020359 | 0.075532 | Metaproterenol Hemisulfate (Orociprenaline) |
| 6.41133  | -0.11389  | 0.104642645  | 10.46426445 | 2.284264 | 0.022356 | 0.081237 | OSI-906 (Linsitinib)                        |
| 6.403121 | -0.09556  | 0.103840795  | 10.38407949 | 2.214577 | 0.026789 | 0.093179 | LORNOXICAM                                  |
| 6.372912 | -0.09143  | 0.103668811  | 10.36688114 | 1.743767 | 0.0812   | 0.212005 | MIFEPRISTONE                                |
| 6.371088 | -0.02997  | 0.103611513  | 10.36115132 | 2.261755 | 0.023713 | 0.084546 | Isipinesib (SB-715992)                      |
| 6.431364 | -0.21732  | 0.103573285  | 10.35732854 | 2.295162 | 0.021724 | 0.079334 | Cephalomannine                              |
| 6.440909 | -0.23767  | 0.102669484  | 10.26694837 | 1.726957 | 0.084175 | 0.217193 | Calcitriol                                  |
| 6.41133  | -0.12768  | 0.102367422  | 10.23674218 | 3.933706 | 8.36E-05 | 0.000647 | MENBUTONE                                   |
| 6.382017 | -0.05457  | 0.102227275  | 10.22272747 | 1.933706 | 0.053149 | 0.156934 | DECOQUINATE [5mM]                           |
| 6.344392 | 0.011858  | 0.101985093  | 10.1985093  | 3.919014 | 8.89E-05 | 0.000885 | SULFACARBAMIDE                              |
| 6.414973 | -0.11961  | 0.101932627  | 10.19326272 | 2.173882 | 0.029714 | 0.100886 | MINAPRINE HYDROCHLORIDE                     |
| 6.361728 | -0.01141  | 0.101653229  | 10.16532294 | 2.219007 | 0.026486 | 0.092189 | Saracatinib (AZD5030)                       |
| 6.399674 | -0.14899  | 0.1014194    | 10.14194002 | 1.705931 | 0.088021 | 0.224324 | SPAGLUMIC ACID                              |
| 6.40654  | -0.10638  | 0.101282187  | 10.12821866 | 2.776131 | 0.005501 | 0.026521 | PAROMOMYCIN SULFATE                         |
| 6.40824  | -0.10595  | 0.100878317  | 10.08783169 | 2.151397 | 0.031445 | 0.105572 | DROPERIDOL                                  |
| 6.378398 | -0.04453  | 0.100612331  | 10.06123309 | 2.196285 | 0.028072 | 0.096655 | VX-680 (Tozasertib, MK-0457)                |
| 6.421604 | -0.13307  | 0.100248649  | 10.02486493 | 2.137969 | 0.032519 | 0.107906 | LINEZOLID                                   |
| 6.401401 | -0.09382  | 0.100187364  | 10.01873641 | 1.89512  | 0.058077 | 0.166771 | LAMOTRIGINE                                 |
| 6.41162  | -0.17484  | 0.099410081  | 9.941008091 | 2.202906 | 0.027601 | 0.095057 | Ligustrazine hydrochloride                  |
| 6.40824  | -0.16368  | 0.099229433  | 9.922943251 | 7.774585 | 7.55E-15 | 1.79E-13 | IS,2R-PHENYLPROPANOLAMINE HYDROCHLORIDE     |
| 6.421604 | -0.13473  | 0.099179962  | 9.917996219 | 1.878093 | 0.060461 | 0.171534 | Phenacetyl                                  |
| 6.416641 | -0.15287  | 0.098736688  | 9.873668279 | 7.735979 | 1.02E-14 | 3.9E-13  | PROCYCLININE HYDROCHLORIDE                  |
| 6.459392 | -0.27764  | 0.09861675   | 9.861674962 | 2.185326 | 0.028665 | 0.088657 | Methotrexate                                |
| 6.439333 | -0.16563  | 0.098424981  | 9.842498063 | 2.148537 | 0.031671 | 0.106123 | AZD9291                                     |
| 6.378398 | -0.04453  | 0.098341658  | 9.834165788 | 2.146718 | 0.031816 | 0.106468 | Foretinib (GSK1363089)                      |
| 6.354108 | 0.003891  | 0.097884886  | 9.788488555 | 2.087558 | 0.036838 | 0.119072 | QUINIDINE GLUCONATE                         |
| 6.382017 | -0.11102  | 0.097661886  | 9.766188572 | 1.642727 | 0.100439 | 0.24617  | ROFLUMILAST                                 |
| 6.450249 | -0.19274  | 0.097459486  | 9.745948561 | 1.84352  | 0.065253 | 0.181559 | SELEGILINE HYDROCHLORIDE                    |
| 6.390935 | -0.07263  | 0.097134559  | 9.713455906 | 1.837374 | 0.066155 | 0.183187 | FLUVOXAMINE MALEATE                         |
| 6.431364 | -0.21714  | 0.096335158  | 9.633515759 | 1.620411 | 0.105144 | 0.252978 | Afuresertib (GSK2110183)                    |
| 6.419956 | -0.13263  | 0.096177557  | 9.617757008 | 2.636214 | 0.008384 | 0.037164 | QUETIAPINE FUMARATE                         |
| 6.40824  | -0.16368  | 0.096168983  | 9.616898258 | 7.5348   | 4.88E-14 | 1.09E-12 | APIXABAN                                    |
| 6.401401 | -0.1491   | 0.096058533  | 9.605853348 | 7.526147 | 5.22E-14 | 1.16E-12 | DIMERCAPROL                                 |
| 6.454845 | -0.21181  | 0.096031478  | 9.603147839 | 3.690233 | 0.000224 | 0.001602 | METACETAMOL                                 |
| 6.330414 | -9.18E-05 | 0.095595096  | 9.555950959 | 2.118143 | 0.034163 | 0.112334 | Gastrin                                     |
| 6.431364 | -0.15287  | 0.094334815  | 9.433481537 | 2.011846 | 0.044236 |          |                                             |

|          |          |              |             |          |          |          |                                       |
|----------|----------|--------------|-------------|----------|----------|----------|---------------------------------------|
| 6.380211 | -0.10395 | 0.0879206634 | 8.79206634  | 6.888548 | 5.64E-12 | 1.04E-10 | SALSALATE                             |
| 6.459392 | -0.21125 | 0.0872240511 | 8.722405077 | 1.649909 | 0.098962 | 0.244185 | NOMIFENSINE MALEATE                   |
| 6.403121 | -0.10707 | 0.087154509  | 8.715450925 | 3.349115 | 0.000811 | 0.005137 | DIBEKACIN                             |
| 6.416641 | -0.18158 | 0.087053945  | 8.705394524 | 6.820641 | 9.06E-12 | 1.64E-10 | PHENOXYBENZAMINE HYDROCHLORIDE        |
| 6.414973 | -0.12288 | 0.086992785  | 8.69927853  | 2.38446  | 0.017104 | 0.066193 | PHYTONADIONE [5mM]                    |
| 6.414973 | -0.13107 | 0.086803043  | 8.680304318 | 3.335609 | 0.000851 | 0.00538  | DIACERIN                              |
| 6.404634 | -0.16006 | 0.086790293  | 8.679029269 | 1.459975 | 0.144297 | 0.314379 | CEFTAZOLE                             |
| 6.367356 | -0.07959 | 0.086501828  | 8.650182838 | 9.19079  | 0.054974 | 0.160107 | Cefprozil hydrochloride               |
| 6.38739  | -0.08891 | 0.086453341  | 8.645334102 | 2.369674 | 0.017804 | 0.088026 | BROMHEXINE HYDROCHLORIDE              |
| 6.416641 | -0.18158 | 0.086341311  | 8.634131081 | 6.764806 | 1.33E-11 | 2.37E-10 | FIROCOXIB                             |
| 6.409933 | -0.17105 | 0.085772462  | 8.577246159 | 1.44274  | 0.149094 | 0.321176 | Tolvaptan                             |
| 6.462398 | -0.28388 | 0.0856815    | 8.568150012 | 1.44121  | 0.149525 | 0.321803 | Succinylcholine Chloride 2H2O         |
| 6.330414 | 0.05197  | 0.085627165  | 8.562716523 | 1.826141 | 0.067829 | 0.186456 | PROPANTHELIN BROMIDE                  |
| 6.40654  | -0.10046 | 0.084945489  | 8.494548939 | 1.854291 | 0.063698 | 0.178214 | Triciribine                           |
| 6.419956 | -0.12972 | 0.084520739  | 8.452073908 | 1.802545 | 0.07146  | 0.19359  | ASCORBIC ACID                         |
| 6.385606 | -0.11886 | 0.084497224  | 8.44972239  | 1.872441 | 0.061146 | 0.172678 | Acetylspiramycin                      |
| 6.426511 | -0.14467 | 0.084150131  | 8.415013056 | 1.591763 | 0.111438 | 0.265254 | DEHYDROACETIC ACID                    |
| 6.389166 | -0.12639 | 0.083828049  | 8.38280488  | 1.410034 | 0.15853  | 0.335786 | CARBAZOCHROME                         |
| 6.4133   | -0.12768 | 0.083299129  | 8.329912924 | 3.200963 | 0.00137  | 0.008164 | BRONOPOL                              |
| 6.419956 | -0.1314  | 0.083113208  | 8.311320825 | 1.572149 | 0.115916 | 0.272618 | PENBUTOLOL SULFATE                    |
| 6.416641 | -0.123   | 0.082933263  | 8.293326269 | 1.768689 | 0.076946 | 0.203809 | MEBEVERINE HYDROCHLORIDE              |
| 6.466868 | -0.23616 | 0.08284214   | 8.284213986 | 3.163402 | 0.001456 | 0.008616 | TIOCONAZOLE                           |
| 6.356026 | -0.00755 | 0.081930993  | 8.193099323 | 2.231901 | 0.025681 | 0.089875 | CEFTAZONE                             |
| 6.445604 | -0.18333 | 0.081350807  | 8.135080674 | 1.538812 | 0.12385  | 0.284228 | TACRINE HYDROCHLORIDE                 |
| 6.414973 | -0.17803 | 0.081202368  | 8.120236772 | 6.362172 | 1.99E-10 | 3.30E-09 | PROBENECID                            |
| 6.409933 | -0.17121 | 0.081149653  | 8.114965341 | 1.798259 | 0.072136 | 0.194798 | Baicalein                             |
| 6.424882 | -0.2032  | 0.080577554  | 8.057755372 | 1.355359 | 0.175303 | 0.358511 | Warfarin-Na                           |
| 6.419956 | -0.18864 | 0.080357232  | 8.035723218 | 6.295956 | 3.06E-10 | 5.03E-09 | PHENYLBUTAZONE                        |
| 6.40654  | -0.16006 | 0.079750066  | 7.975006618 | 6.248385 | 4.15E-10 | 6.74E-09 | DICLOXACILLIN SODIUM                  |
| 6.418301 | -0.12805 | 0.079381559  | 7.938155927 | 1.501562 | 0.13321  | 0.297702 | ZINC UNDECYLENATE [4mM]               |
| 6.409933 | -0.16729 | 0.079337708  | 7.933770799 | 6.216077 | 5.10E-10 | 8.23E-09 | CLOXYQUIN                             |
| 6.436163 | -0.16261 | 0.079007795  | 7.900779495 | 1.684972 | 0.091994 | 0.23143  | MARBOFLOXACIN                         |
| 6.426511 | -0.14302 | 0.078064064  | 7.806406374 | 1.664846 | 0.095944 | 0.23823  | TRYPTOPHAN (L)                        |
| 6.394452 | -0.13776 | 0.078050789  | 7.805078901 | 1.312858 | 0.189231 | 0.37655  | Azelinidipine                         |
| 6.367356 | -0.03464 | 0.077957908  | 7.795790849 | 2.995714 | 0.002738 | 0.014726 | CHLORMIDAZOLE                         |
| 6.419956 | -0.12712 | 0.077939433  | 7.793943252 | 1.701354 | 0.098876 | 0.225718 | Pozotimib (HM781-36B)                 |
| 6.40654  | -0.16006 | 0.077692091  | 7.769209119 | 6.087143 | 1.15E-08 | 1.79E-08 | CEFDROXIL                             |
| 6.414973 | -0.12131 | 0.077550807  | 7.755080701 | 4.67013  | 0.142372 | 0.311894 | DISOPYRAMIDE PHOSPHATE                |
| 6.454845 | -0.19645 | 0.077547761  | 7.754776083 | 1.692805 | 0.090453 | 0.228801 | Prucalopride                          |
| 6.431364 | -0.21732 | 0.077207583  | 7.720758273 | 1.710904 | 0.087099 | 0.223085 | Clofibrate                            |
| 6.423246 | -0.13664 | 0.077124572  | 7.712457221 | 1.644809 | 0.100009 | 0.245771 | BENZOIC ACID                          |
| 6.409933 | -0.12086 | 0.076342918  | 7.634291822 | 2.933654 | 0.00335  | 0.017538 | CLOFIBRIC ACID                        |
| 6.434569 | -0.21978 | 0.076069295  | 7.606929517 | 5.959998 | 2.52E-09 | 3.72E-08 | METHOXAMINE HYDROCHLORIDE             |
| 6.394452 | -0.08951 | 0.074988678  | 7.498867766 | 2.881614 | 0.003956 | 0.020136 | ACEGLUTAMIDE                          |
| 6.450249 | -0.25796 | 0.074834977  | 7.48349765  | 1.658327 | 0.097251 | 0.240428 | Phenylephrine                         |
| 6.414973 | -0.17803 | 0.074825221  | 7.482522137 | 5.862525 | 4.56E-09 | 6.48E-08 | BROMOCRIPTINE MESYLATE                |
| 6.403121 | -0.10707 | 0.074274595  | 7.427459469 | 2.854174 | 0.004315 | 0.021702 | SODIUM CYCLAMATE                      |
| 6.392697 | -0.13398 | 0.073742255  | 7.374225515 | 1.240386 | 0.214833 | 0.410274 | ASENAPINE MALEATE                     |
| 6.426511 | -0.2067  | 0.073438121  | 7.343812082 | 1.23527  | 0.21673  | 0.410208 | Varenicline Tartrate                  |
| 6.436163 | -0.16434 | 0.072638303  | 7.263830335 | 1.991006 | 0.064648 | 0.143274 | NITAZOXANIDE                          |
| 6.421604 | -0.13585 | 0.072325178  | 7.232517785 | 1.982423 | 0.047432 | 0.145894 | LEVOCARNITINE                         |
| 6.396199 | -0.09305 | 0.072102622  | 7.210262189 | 2.770711 | 0.005593 | 0.02884  | ALCORN                                |
| 6.424882 | -0.19914 | 0.071837115  | 7.183711498 | 5.628408 | 1.82E-08 | 2.44E-07 | DIETHYLCARBAMAZINE CITRATE            |
| 6.426511 | -0.14302 | 0.071555353  | 7.155535319 | 1.526037 | 0.127001 | 0.288741 | ONDANSETRON HYDROCHLORIDE             |
| 6.432969 | -0.15298 | 0.071478664  | 7.147866396 | 1.560321 | 0.118684 | 0.276129 | Alisertib (MLN8237)                   |
| 6.389166 | -0.12303 | 0.071419836  | 7.141983588 | 5.595715 | 2.20E-08 | 2.91E-07 | CLOTIRMAZOLE                          |
| 6.416641 | -0.18158 | 0.071381379  | 7.138137867 | 5.592702 | 2.24E-08 | 2.95E-07 | OXACILLIN SODIUM                      |
| 6.444045 | -0.24441 | 0.07080625   | 7.080625011 | 1.191915 | 0.232295 | 0.430129 | PROAZOSIN HYDROCHLORIDE [10mg]        |
| 6.429752 | -0.15123 | 0.070644955  | 7.064495513 | 1.336303 | 0.18145  | 0.365183 | PIRENPERONE                           |
| 6.450249 | -0.19274 | 0.070225841  | 7.022584093 | 1.328375 | 0.184054 | 0.368884 | PENTYLENETETRAZOL                     |
| 6.423246 | -0.19565 | 0.069560004  | 6.956004111 | 5.449684 | 5.05E-08 | 6.38E-07 | ESTRADIOL                             |
| 6.454563 | -0.33211 | 0.06948618   | 6.948618049 | 3.792441 | 0.000149 | 0.001107 | Dacarbazine                           |
| 6.434569 | -0.15937 | 0.069239777  | 6.923977702 | 1.476653 | 0.139769 | 0.307263 | FENBENDAZOLE                          |
| 6.40824  | -0.10384 | 0.069205868  | 6.92058679  | 1.510708 | 0.130863 | 0.295292 | Urosertib (GSK2141795)                |
| 6.419956 | -0.1314  | 0.069083511  | 6.908351051 | 1.306767 | 0.191292 | 0.379618 | CREATININE                            |
| 6.450249 | -0.2025  | 0.068929847  | 6.892984723 | 2.848674 | 0.008081 | 0.036009 | gamma-AMINOBUTYRIC ACID HYDROCHLORIDE |
| 6.41162  | -0.17085 | 0.068811629  | 6.881162942 | 6.391363 | 6.99E-08 | 8.71E-07 | PRIMAQUIN PHOSPHATE                   |
| 6.451786 | -0.19585 | 0.06852922   | 6.852921959 | 1.296282 | 0.194878 | 0.384796 | OXANTEL PAMOATE                       |
| 6.445604 | -0.18333 | 0.068451159  | 6.845115918 | 1.294805 | 0.195387 | 0.385504 | AMOXAPINE                             |
| 6.401401 | -0.09207 | 0.068117479  | 6.811747893 | 1.452718 | 0.146302 | 0.316998 | ALBUTEROL                             |
| 6.448706 | -0.25464 | 0.06795027   | 6.795026986 | 1.505764 | 0.132128 | 0.296578 | Tanshinone I                          |
| 6.390935 | -0.06945 | 0.067748911  | 6.774891143 | 1.478904 | 0.139166 | 0.306156 | Eltrombopag                           |
| 6.419956 | -0.12972 | 0.067647177  | 6.764717732 | 1.442688 | 0.149108 | 0.321176 | BUTAMBEN                              |
| 6.4133   | -0.11792 | 0.06691008   | 6.691008024 | 1.265655 | 0.205637 | 0.397756 | IRINOTECAN HYDROCHLORIDE              |
| 6.432969 | -0.15298 | 0.066531385  | 6.65313854  | 1.452326 | 0.146411 | 0.317002 | Mecarbinate                           |
| 6.418301 | -0.18512 | 0.066432871  | 6.643287119 | 5.204988 | 1.94E-07 | 2.32E-06 | NADIDE                                |
| 6.457882 | -0.21796 | 0.066195135  | 6.619513488 | 2.543702 | 0.010968 | 0.046799 | PYRETHRINS                            |
| 6.444045 | -0.17976 | 0.066083533  | 6.608353294 | 1.81134  | 0.070088 | 0.191694 | PEMIROLAST POTASSIUM                  |
| 6.440909 | -0.23786 | 0.066045249  | 6.60452492  | 1.463549 | 0.143317 | 0.313523 | Psoralen                              |
| 6.332438 | 0.046799 | 0.065947872  | 6.594787222 | 1.439588 | 0.149884 | 0.322519 | Linifanib (ABT-869)                   |
| 6.465383 | -0.28053 | 0.065934591  | 6.593459073 | 1.461097 | 0.143989 | 0.314113 | Tabersonine                           |
| 6.4133   | -0.11961 | 0.065685685  | 6.568568522 | 1.800435 | 0.071792 | 0.194073 | CIPROFLOXACIN                         |
| 6.456386 | -0.27112 | 0.065670372  | 6.567037162 | 1.455242 | 0.145602 | 0.315883 | Hydroxocobalamin HCl                  |
| 6.44248  | -0.17543 | 0.065651096  | 6.565109643 | 1.400119 | 0.161478 | 0.338646 | VORICONAZOLE                          |
| 6.429752 | -0.21367 | 0.065619906  | 6.561990612 | 1.103763 | 0.269696 | 0.471922 | LUMEFANTRINE                          |
| 6.451786 | -0.19038 | 0.065560194  | 6.556019418 | 1.431126 | 0.152394 | 0.326331 | BAF312 (Siponimod)                    |
| 6.403121 | -0.10707 | 0.065464461  | 6.546446121 | 2.515624 | 0.011882 | 0.049582 | PYRONARIDINE TETRAPHOSPHATE           |
| 6.444045 | -0.17976 | 0.065446885  | 6.544688002 | 1.793889 | 0.072831 | 0.196157 | PACLITAXEL                            |
| 6.414973 | -0.12131 | 0.065440786  | 6.544078631 | 1.237862 | 0.215767 | 0.410832 | RETINYL PALMITATE                     |
| 6.447158 | -0.18648 | 0.065126697  | 6.512669724 | 1.231921 | 0.217979 | 0.413404 | ERYTHRITOL                            |
| 6.419956 | -0.13263 | 0.064651165  | 6.465116472 | 1.772079 | 0.076381 | 0.202839 | CLAVULANATE LITHIUM                   |
| 6.404834 | -0.10304 | 0.064625733  | 6.462573322 | 1.771382 | 0.076497 | 0.202944 | MEPHENYTOIN                           |
| 6.463893 | -0.22037 | 0.064550074  | 6.455007416 | 1.221013 | 0.222081 | 0.417579 | ACETOHYDROXAMIC ACID                  |
| 6.445604 | -0.17809 | 0.064526483  | 6.452648343 | 1.408561 | 0.158965 | 0.336323 | TH-302                                |
| 6.429752 | -0.14859 | 0.064305356  | 6.430535601 | 1.403892 | 0.160378 | 0.337336 | Ledipasvir (GS5885)                   |
| 6.459392 | -0.21125 | 0.064271346  | 6.427134648 | 1.215741 | 0.224084 | 0.419338 | SILDENAFIL CITRATE                    |
| 6.4133   | -0.17446 | 0.064213056  | 6.421305633 | 5.031067 | 4.88E-07 | 5.55E-06 | MICONAZOLE NITRATE                    |
| 6.389166 | -0.12639 | 0.063734802  | 6.373480202 | 1.072055 | 0.283695 | 0.489064 | NICOPHOLINE                           |
| 6.394452 | -0.13776 | 0.063692073  | 6.369207264 | 1.071336 | 0.284018 | 0.489347 | ACEFYLLINE                            |
| 6.421604 | -0.19215 | 0.06238381   | 6.238380973 | 4.887746 | 1.02E-06 | 1.11E-05 | SODIUM NITROPRUSSIDE DIHYDRATE        |
| 6.431364 | -0.1545  | 0.062361329  | 6.236132903 | 1.179612 | 0.238155 | 0.435327 | PRAVASTATIN SODIUM                    |
| 6.424882 | -0.13691 | 0.061594352  | 6.159435202 | 1.344555 | 0.178769 | 0.362207 | LY2835219                             |
| 6.429752 | -0.15179 | 0.061457905  | 6.145790468 | 1.684553 | 0.092075 | 0.23143  | KETOROLAC TROMETHAMINE                |
| 6.426511 | -0.14015 | 0.061297437  | 6.129743659 | 1.338073 | 0.180873 | 0.364737 | Lomitapide                            |
| 6.440909 | -0.23786 | 0.061027413  | 6.102741281 | 1.352355 | 0.176262 | 0.359721 | Ulipristal acetate                    |
| 6.450249 | -0.25796 | 0.061004063  | 6.100406321 | 1.351837 | 0.176427 | 0.359721 | Etofenamate                           |
| 6.44248  | -0.17543 | 0.060981346  | 6.09813458  | 1.300102 | 0.193566 | 0.383092 | TRICHLORMETHIAZIDE                    |
| 6.44248  | -0.17669 | 0.060814916  | 6.081491604 | 1.666928 | 0.095529 | 0.237611 | COLFORSIN                             |
| 6.423246 | -0.1368  | 0.060525356  | 6.052535607 | 1.292936 | 0.196033 | 0.386127 | CEFMENOXIME HYDROCHLORIDE             |
| 6.409933 | -0.1111  | 0.06050506   | 6.050505072 | 1.444999 | 0.252417 | 0.426338 | ANIRACETAM                            |
| 6.429752 | -0.      |              |             |          |          |          |                                       |

|          |          |              |             |          |           |           |                                     |
|----------|----------|--------------|-------------|----------|-----------|-----------|-------------------------------------|
| 6.457882 | -0.27438 | 0.057241041  | 5.724104091 | 1.268449 | 0.204638  | 0.395973  | Bulleyaconi cine A                  |
| 6.39794  | -0.08505 | 0.057239468  | 5.723946794 | 1.220727 | 0.22219   | 0.417608  | SCOPOLAMINE HYDROBROMIDE            |
| 6.456366 | -0.20386 | 0.057234522  | 5.723452236 | 1.56879  | 0.116697  | 0.273325  | NICLOSAMIDE                         |
| 6.434569 | -0.15937 | 0.057132568  | 5.713256817 | 1.218447 | 0.223054  | 0.418335  | AVANAFIL                            |
| 6.434569 | -0.15616 | 0.056972866  | 5.697286599 | 1.243671 | 0.213621  | 0.408874  | CO-1686 (AVL-301)                   |
| 6.431364 | -0.16426 | 0.056964995  | 5.696499492 | 2.189012 | 0.028596  | 0.097934  | CINCHONINE                          |
| 6.39794  | -0.14173 | 0.056905805  | 5.690580475 | 4.450711 | 8.656E-06 | 0.006E-05 | ALLOPURINOL                         |
| 6.423246 | -0.1386  | 0.056827471  | 5.674710251 | 1.200152 | 0.230005  | 0.426971  | CEFACLOR                            |
| 6.365488 | -0.07557 | 0.056209012  | 5.620901184 | 1.245558 | 0.212919  | 0.408019  | Daphnetin                           |
| 6.439333 | -0.23447 | 0.056159559  | 5.615955867 | 1.244484 | 0.213322  | 0.408607  | Chitosan                            |
| 6.489958 | -0.28292 | 0.056079594  | 5.607959371 | 2.154989 | 0.031163  | 0.104831  | ETEBENEICID                         |
| 6.428135 | -0.20607 | 0.055927277  | 5.592727652 | 4.381879 | 1.18E-05  | 0.000109  | METHACHOLINE CHLORIDE               |
| 6.444045 | -0.24461 | 0.055908861  | 5.590886078 | 1.238928 | 0.215372  | 0.410577  | Methyl salicylate                   |
| 6.411956 | -0.1926  | 0.055740582  | 5.574058212 | 0.937588 | 0.348456  | 0.550817  | DIDANOSINE                          |
| 6.41162  | -0.17088 | 0.055713863  | 5.571386334 | 4.365158 | 1.27E-05  | 0.000116  | ALVERINE CITRATE                    |
| 6.428135 | -0.20607 | 0.055638235  | 5.563823514 | 4.359233 | 1.31E-05  | 0.000119  | ERYTHROMYCIN                        |
| 6.436163 | -0.22746 | 0.055471446  | 5.547144617 | 0.933061 | 0.350789  | 0.552916  | BICALUTAMIDE                        |
| 6.39794  | -0.08682 | 0.055245372  | 5.524537163 | 1.045008 | 0.296019  | 0.500535  | PANTHENOL (d)                       |
| 6.437751 | -0.16744 | 0.055116528  | 5.511652795 | 1.510736 | 0.130856  | 0.295292  | FLUVASTATIN SODIUM                  |
| 6.451786 | -0.1949  | 0.055008783  | 5.500878287 | 1.507783 | 0.13161   | 0.295666  | SIMVASTATIN                         |
| 6.456366 | -0.20386 | 0.054907275  | 5.490727548 | 1.505001 | 0.132324  | 0.296758  | NONOXNYL-9                          |
| 6.460898 | -0.2143  | 0.054829802  | 5.482980202 | 1.037134 | 0.299674  | 0.504005  | PRALIDOXIME MESYLATE                |
| 6.474216 | -0.24127 | 0.054757257  | 5.475725699 | 1.035775 | 0.300307  | 0.504453  | PENTETIC ACID                       |
| 6.434569 | -0.21978 | 0.054736851  | 5.473685145 | 4.28861  | 1.80E-05  | 0.000161  | PROCHLORPERAZINE EDISYLATE          |
| 6.456366 | -0.21489 | 0.054657362  | 5.465736186 | 2.100336 | 0.035699  | 0.116051  | PROFLAVINE HEMISULFATE              |
| 6.403121 | -0.09566 | 0.054607255  | 5.460725544 | 1.16459  | 0.244185  | 0.443076  | beta-CAROTENE [2nm]                 |
| 6.41162  | -0.11055 | 0.054583015  | 5.458301465 | 1.191503 | 0.233456  | 0.430272  | Amonafide                           |
| 6.419956 | -0.12712 | 0.05448603   | 5.448603008 | 1.189386 | 0.234288  | 0.431494  | BYL719                              |
| 6.356026 | -0.05521 | 0.054484211  | 5.448421148 | 1.207359 | 0.227294  | 0.424106  | Retigabine                          |
| 6.436163 | -0.16422 | 0.054354216  | 5.435421598 | 1.028151 | 0.303879  | 0.508119  | PIPAMPERONE                         |
| 6.432969 | -0.15298 | 0.053981715  | 5.398171546 | 1.178377 | 0.238646  | 0.435825  | Mastinib (AB1010)                   |
| 6.421604 | -0.19215 | 0.053851623  | 5.385162288 | 4.219253 | 2.45E-05  | 0.000214  | PHENELZINE SULFATE                  |
| 6.416641 | -0.18158 | 0.053782451  | 5.378245103 | 4.213833 | 2.51E-05  | 0.000219  | CHLOROZOXAZONE                      |
| 6.439333 | -0.16904 | 0.053715003  | 5.371500278 | 1.145562 | 0.251977  | 0.45232   | SULOCTIDIL                          |
| 6.359835 | -0.0634  | 0.053655702  | 5.3655702   | 1.188999 | 0.23444   | 0.431619  | MK3102                              |
| 6.488551 | -0.28006 | 0.053552462  | 5.355246292 | 2.057878 | 0.039602  | 0.126554  | TRICHLOROETHYLENE                   |
| 6.4943   | -0.27146 | 0.053503991  | 5.350399781 | 2.056207 | 0.039763  | 0.126844  | DOCETAXEL                           |
| 6.423246 | -0.19885 | 0.053506521  | 5.350621007 | 1.185686 | 0.235746  | 0.433266  | Fingolimod                          |
| 6.423246 | -0.19885 | 0.053503566  | 5.350356584 | 1.18563  | 0.235769  | 0.433266  | Erlotinibine HCl                    |
| 6.450249 | -0.25796 | 0.053214005  | 5.321400461 | 1.179211 | 0.238314  | 0.435463  | 17-Methyltestosterone               |
| 6.462398 | -0.22711 | 0.053082788  | 5.308278774 | 2.03983  | 0.041367  | 0.130903  | RETINYL ACETATE                     |
| 6.439333 | -0.22993 | 0.05295062   | 5.295062004 | 4.148659 | 3.34E-05  | 0.000283  | METHOCARBAMOL                       |
| 6.436163 | -0.15933 | 0.05277576   | 5.277575954 | 1.152052 | 0.2493    | 0.449284  | Tianeptine sodium                   |
| 6.436163 | -0.16434 | 0.052696198  | 5.269619801 | 1.444395 | 0.148628  | 0.320545  | BETAZOLE HYDROCHLORIDE              |
| 6.354108 | -0.05108 | 0.052517842  | 5.251784232 | 1.163784 | 0.244511  | 0.443076  | Osalimid                            |
| 6.436163 | -0.22765 | 0.052295706  | 5.229570565 | 1.158862 | 0.246513  | 0.445515  | Dihydralazine sulphate              |
| 6.463893 | -0.22037 | 0.052244286  | 5.224428577 | 0.98824  | 0.323035  | 0.529879  | ACECAINIDE HYDROCHLORIDE            |
| 6.431364 | -0.21295 | 0.052225387  | 5.222538725 | 4.091838 | 4.28E-05  | 0.000353  | SODIUM OXYBATE                      |
| 6.432969 | -0.21637 | 0.052156352  | 5.215635156 | 4.086429 | 4.38E-05  | 0.00036   | NYSTATIN                            |
| 6.38739  | -0.1227  | 0.051912175  | 5.191217488 | 1.150363 | 0.249994  | 0.450006  | Dicuroene                           |
| 6.41162  | -0.11055 | 0.051748948  | 5.174894846 | 1.129637 | 0.258629  | 0.458931  | Crizotinib (PF-02341066)            |
| 6.4843   | -0.33123 | 0.051695372  | 5.169537164 | 1.145558 | 0.251978  | 0.45232   | Arctigenin                          |
| 6.445604 | -0.18281 | 0.051657701  | 5.165770056 | 1.141593 | 0.156796  | 0.332924  | TYLOSIN TARTRATE                    |
| 6.428135 | -0.15772 | 0.051608625  | 5.160862547 | 1.983181 | 0.047347  | 0.14546   | CYPERMETHRIN                        |
| 6.453318 | -0.26435 | 0.051391248  | 5.139124753 | 0.864429 | 0.387352  | 0.584773  | Anagrelide                          |
| 6.44248  | -0.17543 | 0.051347108  | 5.134710767 | 1.095062 | 0.273489  | 0.476119  | MEROPENEM                           |
| 6.453318 | -0.19895 | 0.051195039  | 5.119503907 | 0.968393 | 0.332848  | 0.537428  | CLONAZEPAM                          |
| 6.444045 | -0.17976 | 0.051072862  | 5.107286193 | 1.3999   | 0.161543  | 0.338646  | BIFONAZOLE                          |
| 6.460898 | -0.22407 | 0.050904032  | 5.090403158 | 1.956106 | 0.050453  | 0.151329  | CLENBUTEROL HYDROCHLORIDE           |
| 6.423246 | -0.19565 | 0.050654058  | 5.065405824 | 3.968725 | 7.23E-05  | 0.000566  | MEQUINOL                            |
| 6.440909 | -0.17383 | 0.050597124  | 5.059712434 | 0.957083 | 0.338525  | 0.541979  | GABOXADOL HYDROCHLORIDE             |
| 6.4133   | -0.17829 | 0.050400654  | 5.040065411 | 0.847767 | 0.396568  | 0.593692  | GLUTAMINE (L) HYDROCHLORIDE         |
| 6.477121 | -0.31579 | 0.050272975  | 5.027297509 | 1.114038 | 0.265263  | 0.466556  | Eupatilin                           |
| 6.4133   | -0.11961 | 0.04998142   | 4.998142181 | 1.370442 | 0.170549  | 0.352527  | CLOFIBRATE                          |
| 6.480007 | -0.253   | 0.049845606  | 4.984560564 | 0.944759 | 0.344782  | 0.547105  | ACTINOQUINOL SODIUM                 |
| 6.429752 | -0.20952 | 0.049811728  | 4.981172767 | 3.903512 | 9.48E-05  | 0.000723  | NAPROXEN                            |
| 6.423246 | -0.14782 | 0.049757691  | 4.975769139 | 1.912055 | 0.055869  | 0.161976  | HYDRASTININE HYDROCHLORIDE          |
| 6.477121 | -0.31579 | 0.049752223  | 4.975222252 | 1.102499 | 0.270245  | 0.472721  | Levothyroxine Na                    |
| 6.439333 | -0.16563 | 0.049016912  | 4.901691174 | 1.069999 | 0.28462   | 0.489668  | Tideglusib                          |
| 6.385066 | -0.11873 | 0.048998357  | 4.899835655 | 0.824218 | 0.409838  | 0.60559   | ACENEURAMIC ACID                    |
| 6.41162  | -0.11632 | 0.048924123  | 4.892412332 | 1.341003 | 0.179919  | 0.363674  | PENTOXIFYLLINE                      |
| 6.450249 | -0.19189 | 0.048783337  | 4.878337018 | 1.337145 | 0.181175  | 0.365086  | LEVABUTEROL HYDROCHLORIDE           |
| 6.352183 | -0.04694 | 0.048551691  | 4.855169058 | 1.075895 | 0.281974  | 0.487152  | Alvimopan                           |
| 6.421604 | -0.1445  | 0.048476674  | 4.847667401 | 1.862829 | 0.062486  | 0.175593  | MECLOFENOXATE HYDROCHLORIDE         |
| 6.426511 | -0.14467 | 0.048222133  | 4.822213292 | 0.912158 | 0.361685  | 0.562695  | PREDNISOLONE TEBUTATE               |
| 6.488551 | -0.34012 | 0.048171412  | 4.817141199 | 0.81027  | 0.417785  | 0.612385  | Toremifene Base                     |
| 6.454845 | -0.21181 | 0.047740799  | 4.774079891 | 1.834551 | 0.066572  | 0.183768  | PICOLAMINE                          |
| 6.457882 | -0.27438 | 0.047669789  | 4.766978925 | 1.056352 | 0.290807  | 0.494827  | Gemifloxacin                        |
| 6.462398 | -0.21566 | 0.047518486  | 4.751848638 | 1.302475 | 0.192754  | 0.38178   | CARBADOX                            |
| 6.437751 | -0.16583 | 0.047513432  | 4.751343206 | 1.013303 | 0.310916  | 0.516679  | SULINDAC                            |
| 6.39794  | -0.08337 | 0.047369445  | 4.736944505 | 1.034036 | 0.301118  | 0.50532   | Mesopropine Citrate                 |
| 6.40824  | -0.16741 | 0.046814492  | 4.681449197 | 0.787446 | 0.431021  | 0.624633  | CLINDAMYCIN PALMITATE HYDROCHLORIDE |
| 6.419956 | -0.13263 | 0.046723446  | 4.672344583 | 1.280683 | 0.200305  | 0.391448  | TYROSINE HYDROCHLORIDE              |
| 6.424882 | -0.15113 | 0.046596893  | 4.659689284 | 1.790594 | 0.073358  | 0.196956  | DIMESNA                             |
| 6.414973 | -0.13107 | 0.046556267  | 4.655626662 | 1.789033 | 0.07361   | 0.197527  | ACETYL-L-LEUCINE                    |
| 6.40824  | -0.10595 | 0.046540072  | 4.654007191 | 0.992544 | 0.320932  | 0.528293  | DICUMAROL                           |
| 6.448706 | -0.25443 | 0.046463491  | 4.646349095 | 0.781542 | 0.434484  | 0.626732  | ZONISAMIDE                          |
| 6.475671 | -0.31266 | 0.046423173  | 4.642317329 | 1.028728 | 0.303608  | 0.507842  | Actinibin                           |
| 6.471292 | -0.23535 | 0.04619454   | 4.619453996 | 0.873805 | 0.382225  | 0.581745  | SULFADOXINE                         |
| 6.409933 | -0.16729 | 0.046129346  | 4.612934606 | 3.614215 | 0.000301  | 0.00209   | CYCLOPENTOLATE HYDROCHLORIDE        |
| 6.429752 | -0.20952 | 0.045960955  | 4.596095465 | 3.601022 | 0.000317  | 0.002184  | METAPROTERENOL                      |
| 6.439333 | -0.23447 | 0.045927264  | 4.592726427 | 1.017738 | 0.308802  | 0.513834  | Cholic Acid                         |
| 6.444045 | -0.1786  | 0.045510175  | 4.551017509 | 0.97058  | 0.331757  | 0.536512  | CYCLOHEXIMIDE                       |
| 6.447158 | -0.18585 | 0.045201126  | 4.520112561 | 1.238957 | 0.215362  | 0.410577  | FLUCYTOSINE                         |
| 6.424882 | -0.11497 | 0.045148263  | 4.514826303 | 0.854014 | 0.393097  | 0.590569  | BISMUTH SUBSALICYLATE               |
| 6.399674 | -0.08681 | 0.045125879  | 4.512587833 | 0.985061 | 0.324584  | 0.531438  | FT-207 (NSC 148958)                 |
| 6.40824  | -0.16368 | 0.044950949  | 4.495094911 | 3.521888 | 0.000428  | 0.002875  | CHLORTHALIDONE                      |
| 6.418301 | -0.18905 | 0.044800093  | 4.480009338 | 0.753562 | 0.451112  | 0.639857  | D-ERYTHROIC ACID                    |
| 6.416641 | -0.12614 | 0.044611546  | 4.461154612 | 1.222796 | 0.221407  | 0.417157  | ARTEMETHER                          |
| 6.44248  | -0.17543 | 0.044523275  | 4.452327491 | 0.949533 | 0.34235   | 0.545215  | PROGLUMIDE                          |
| 6.382017 | -0.06433 | 0.044443097  | 4.444309737 | 1.707829 | 0.087668  | 0.223912  | IOVERSOL                            |
| 6.489958 | -0.28292 | 0.044076998  | 4.407699753 | 1.689376 | 0.090311  | 0.228567  | SULFANILAMIDE                       |
| 6.454845 | -0.20089 | 0.044055092  | 4.405509234 | 1.207544 | 0.227223  | 0.424106  | TORSEMIDE                           |
| 6.434569 | -0.15937 | 0.044047225  | 4.404722511 | 0.93938  | 0.347536  | 0.550288  | FLUBENDAZOLE                        |
| 6.456366 | -0.2036  | 0.043867214  | 4.386721423 | 0.935541 | 0.349509  | 0.55163   | TETRACYCLINE HYDROCHLORIDE          |
| 6.456366 | -0.21489 | 0.043837952  | 4.383795199 | 1.684575 | 0.092071  | 0.23143   | HEXAMETHONIUM BROMIDE               |
| 6.437751 | -0.16583 | 0.043710499  | 4.371049923 | 0.932199 | 0.351234  | 0.552988  | TOLAZAMIDE                          |
| 6.409933 | -0.1111  | 0.043427215  | 4.342721471 | 0.821459 | 0.411385  | 0.607373  | TERBINAFINE HYDROCHLORIDE           |
| 6.4133   | -0.17829 | 0.043018335  | 4.301833113 | 0.728361 | 0.466393  | 0.652618  | CLINDIPINE                          |
| 6.453318 | -0.08681 | 0.0431961877 | 4.319618777 | 0.92123  | 0.35693   | 0.557814  | BUMETANIDE                          |
| 6.445604 | -0.17809 | 0.042671895  | 4.267189528 | 0.931493 |           |           |                                     |

|           |          |             |             |          |          |          |                                   |
|-----------|----------|-------------|-------------|----------|----------|----------|-----------------------------------|
| 6.392697  | -0.0793  | 0.039244464 | 3.924446448 | 1.075685 | 0.282068 | 0.487152 | BIOTIN                            |
| 6.494155  | -0.29141 | 0.039148854 | 3.91488545  | 1.504386 | 0.132482 | 0.296983 | BENFOTIAMINE                      |
| 6.474216  | -0.23495 | 0.039140907 | 3.914090698 | 0.854414 | 0.392876 | 0.590409 | LDE225 (NVP-LDE225,Erismodegib)   |
| 6.447158  | -0.18118 | 0.039007511 | 3.900751122 | 0.851502 | 0.39449  | 0.591793 | Trelagliptin                      |
| 6.453318  | -0.26435 | 0.038981104 | 3.898110444 | 0.655684 | 0.512028 | 0.692624 | Dinoprostone                      |
| 6.385606  | -0.06543 | 0.038861898 | 3.886189751 | 1.065199 | 0.286786 | 0.491196 | SPIRAMYCIN                        |
| 6.453318  | -0.1979  | 0.03857937  | 3.85793708  | 1.065091 | 0.286835 | 0.491196 | ENROFLOXACIN                      |
| 6.478566  | -0.23829 | 0.038571607 | 3.8571607   | 1.488229 | 0.136683 | 0.302036 | ETHAVERINE HYDROCHLORIDE          |
| 6.457882  | -0.20668 | 0.038295616 | 3.829561626 | 0.816718 | 0.41409  | 0.609411 | LISINAPRIL                        |
| 6.448706  | -0.19938 | 0.038031011 | 3.803011053 | 1.461395 | 0.143907 | 0.314113 | CHROMOCARB                        |
| 6.4448706 | -0.18888 | 0.03796725  | 3.796724989 | 1.040677 | 0.298025 | 0.502256 | ASPARTAME                         |
| 6.444045  | -0.1786  | 0.037398449 | 3.739844865 | 0.797584 | 0.425112 | 0.61852  | SALICYL ALCOHOL                   |
| 6.447158  | -0.18585 | 0.037341819 | 3.734181934 | 1.023534 | 0.306055 | 0.510328 | TELENZEPINE HYDROCHLORIDE         |
| 6.431364  | -0.16426 | 0.036902538 | 3.690253841 | 1.418066 | 0.156172 | 0.332391 | BORNYL ACETATE                    |
| 6.357935  | -0.05931 | 0.03645524  | 3.645524011 | 0.80784  | 0.419182 | 0.613536 | Fomononetin                       |
| 6.44248   | -0.17543 | 0.035925831 | 3.592583083 | 0.766178 | 0.44357  | 0.635064 | SALICIN                           |
| 6.424882  | -0.2032  | 0.035912868 | 3.591286763 | 0.604074 | 0.545794 | 0.720781 | Dexmedetomidine                   |
| 6.451786  | -0.26106 | 0.035867762 | 3.586776196 | 0.603316 | 0.546299 | 0.720889 | Nedaplatin                        |
| 6.440909  | -0.23329 | 0.035827151 | 3.582715141 | 2.807043 | 0.005    | 0.024404 | DIENESTROL                        |
| 6.440909  | -0.23786 | 0.035662095 | 3.566209456 | 0.790264 | 0.429373 | 0.62295  | Solithromycin                     |
| 6.445604  | -0.18177 | 0.035508526 | 3.550852645 | 0.757278 | 0.448883 | 0.638767 | PROPOXYCAINE HYDROCHLORIDE        |
| 6.4643    | -0.33098 | 0.035377896 | 3.537789563 | 0.595076 | 0.551793 | 0.725699 | Tricagrelor                       |
| 6.440909  | -0.23329 | 0.035307320 | 3.530732017 | 2.754239 | 0.005983 | 0.027238 | PHEINIRAMINE MALEATE              |
| 6.463893  | -0.21859 | 0.035121225 | 3.51212252  | 0.962668 | 0.335714 | 0.539331 | CROTAMITON                        |
| 6.459392  | -0.20974 | 0.035086718 | 3.508671767 | 0.748282 | 0.45429  | 0.64243  | MONTELUKAST SODIUM                |
| 6.436163  | -0.15933 | 0.035079143 | 3.50791429  | 0.765749 | 0.443826 | 0.635064 | Lercanidipine (hydrochloride)     |
| 6.480007  | -0.253   | 0.034976269 | 3.497626866 | 0.661603 | 0.508226 | 0.690217 | TRIMETHADIONE                     |
| 6.495544  | -0.29423 | 0.034923274 | 3.492327364 | 1.342008 | 0.179593 | 0.363159 | CEفالONIUM                        |
| 6.44248   | -0.23664 | 0.034918521 | 3.491852054 | 2.735852 | 0.006222 | 0.029172 | METHICILLIN SODIUM                |
| 6.374748  | -0.03728 | 0.034861002 | 3.486100234 | 0.760987 | 0.446665 | 0.637559 | LEE011                            |
| 6.426511  | -0.14015 | 0.034823882 | 3.482388227 | 0.760177 | 0.447149 | 0.638072 | Ziprasidone HCl                   |
| 6.440909  | -0.23786 | 0.034584955 | 3.458495472 | 0.766395 | 0.443441 | 0.635064 | 4-Aminoantipyrine                 |
| 6.431364  | -0.15287 | 0.034574284 | 3.457428427 | 0.737354 | 0.460907 | 0.647242 | SULCONAZOLE NITRATE               |
| 6.456366  | -0.21489 | 0.034545536 | 3.454553557 | 1.327493 | 0.184346 | 0.36898  | ACETARSOL                         |
| 6.451786  | -0.1949  | 0.034188692 | 3.418869228 | 0.937107 | 0.348703 | 0.551037 | ORLISTAT                          |
| 6.423246  | -0.13366 | 0.034102396 | 3.41023962  | 0.744428 | 0.456618 | 0.643455 | Belinostat (PXD101)               |
| 6.462398  | -0.2841  | 0.033907961 | 3.390796133 | 0.752617 | 0.45168  | 0.640255 | Bedaquiline(TMC207; R207910)      |
| 6.451786  | -0.16431 | 0.033907961 | 3.390796133 | 0.723144 | 0.469592 | 0.65584  | SPIPERONE                         |
| 6.44248   | -0.23664 | 0.033882612 | 3.388261246 | 2.654689 | 0.007938 | 0.035586 | DIPHENHYDRAMINE HYDROCHLORIDE     |
| 6.462398  | -0.2841  | 0.033734324 | 3.373432395 | 0.747526 | 0.454746 | 0.642822 | Salifungin                        |
| 6.460898  | -0.2128  | 0.033297992 | 3.329799153 | 0.710135 | 0.47762  | 0.663125 | TOLAZOLINE HYDROCHLORIDE          |
| 6.447158  | -0.18492 | 0.033295218 | 3.329521835 | 0.710076 | 0.477657 | 0.663125 | FLUFENAMIC ACID                   |
| 6.440909  | -0.23329 | 0.033255189 | 3.325518901 | 2.60553  | 0.009173 | 0.040177 | CHLOROCRESOL                      |
| 6.469822  | -0.24214 | 0.033181542 | 3.318154207 | 1.275078 | 0.202282 | 0.393347 | IDEBENONE                         |
| 6.445604  | -0.24776 | 0.033171586 | 3.317158625 | 0.557964 | 0.576869 | 0.745098 | TREHALOSE DIHYDRATE               |
| 6.495544  | -0.29423 | 0.032862152 | 3.286215152 | 1.262805 | 0.206659 | 0.39853  | NIMUSTINE HYDROCHLORIDE           |
| 6.494155  | -0.29141 | 0.032786292 | 3.278629174 | 1.259889 | 0.207709 | 0.400102 | BULFOMEDIL HYDROCHLORIDE          |
| 6.451786  | -0.19431 | 0.032632126 | 3.2632126   | 0.695934 | 0.48647  | 0.671174 | SULFAMETHIZOLE                    |
| 6.434569  | -0.16122 | 0.032319804 | 3.231980386 | 0.885881 | 0.375681 | 0.57624  | INAMRINONE                        |
| 6.432969  | -0.22078 | 0.032286593 | 3.228659285 | 0.715464 | 0.474322 | 0.668082 | TAK-438(Fenpropizan fumarate)     |
| 6.465393  | -0.2903  | 0.031964634 | 3.196463432 | 0.537653 | 0.59081  | 0.755104 | NILVADIPINE                       |
| 6.447158  | -0.2511  | 0.031943059 | 3.194305938 | 0.5373   | 0.59106  | 0.755236 | ZALTOPROFEN                       |
| 6.454845  | -0.26763 | 0.03188439  | 3.188439019 | 0.536313 | 0.591742 | 0.75573  | Mirabegron                        |
| 6.445604  | -0.18281 | 0.031883139 | 3.188313889 | 0.873912 | 0.382166 | 0.581745 | LANSOPRAZOLE                      |
| 6.444045  | -0.17976 | 0.031823258 | 3.18232578  | 0.872271 | 0.383061 | 0.582152 | SODIUM GLUCONATE                  |
| 6.481443  | -0.25591 | 0.031778468 | 3.177846809 | 0.601114 | 0.547764 | 0.721707 | ETHYL VANILLIN                    |
| 6.44248   | -0.18677 | 0.031557118 | 3.155711848 | 1.212656 | 0.225262 | 0.421234 | LOMERIZINE HYDROCHLORIDE          |
| 6.477121  | -0.25692 | 0.031339791 | 3.133979056 | 1.204304 | 0.228472 | 0.4251   | PRASUGREL                         |
| 6.448706  | -0.18888 | 0.031297407 | 3.129740651 | 0.857858 | 0.390971 | 0.587892 | BLEOMYCIN (bleomycin B2 shown)    |
| 6.460898  | -0.22407 | 0.031251772 | 3.125177205 | 1.200922 | 0.229781 | 0.426725 | MEVASTATIN                        |
| 6.477121  | -0.31579 | 0.03123065  | 3.123064983 | 0.692065 | 0.488897 | 0.672729 | Nicarbazine                       |
| 6.485721  | -0.26457 | 0.031156924 | 3.115692422 | 0.589357 | 0.556622 | 0.727752 | ENTACAPONE                        |
| 6.444045  | -0.23997 | 0.031138001 | 3.113800118 | 2.429665 | 0.014702 | 0.058852 | PAPAVERINE HYDROCHLORIDE          |
| 6.469822  | -0.23019 | 0.030967347 | 3.096734666 | 0.848811 | 0.395987 | 0.595316 | DESVENLAFAXINE SUCCINATE          |
| 6.423246  | -0.13806 | 0.030928009 | 3.092800937 | 0.585027 | 0.55853  | 0.730253 | QUINAPRILAT                       |
| 6.426511  | -0.14545 | 0.030913954 | 3.091395394 | 0.338028 | 0.402015 | 0.588522 | NICOTINYL ALCOHOL TARTRATE        |
| 6.426511  | -0.14545 | 0.030438646 | 3.043864604 | 0.834327 | 0.404097 | 0.589703 | AMIFOSTINE                        |
| 6.382017  | -0.11102 | 0.030100881 | 3.010088092 | 0.506314 | 0.612637 | 0.771446 | ARTEMOTIL                         |
| 6.428135  | -0.14632 | 0.030097859 | 3.009785931 | 0.641887 | 0.520947 | 0.700065 | SALICYLIC ACID                    |
| 6.480007  | -0.253   | 0.030050533 | 3.005053261 | 0.568429 | 0.569744 | 0.740002 | CRYOFLURANE                       |
| 6.469822  | -0.24214 | 0.029839852 | 2.983985226 | 1.146666 | 0.25152  | 0.452012 | LIPOAMIDE                         |
| 6.498311  | -0.29983 | 0.029788257 | 2.978825728 | 1.144683 | 0.25234  | 0.452638 | NANOFIN                           |
| 6.460898  | -0.2128  | 0.029739048 | 2.973904751 | 0.634235 | 0.525928 | 0.703803 | FAMOTIDINE                        |
| 6.448706  | -0.18962 | 0.029625547 | 2.962554677 | 0.56039  | 0.575214 | 0.744274 | PERMETHRIN                        |
| 6.447158  | -0.18585 | 0.02962492  | 2.962491993 | 0.812015 | 0.416783 | 0.611266 | METHAZOLAMIDE                     |
| 6.383815  | -0.05821 | 0.029538449 | 2.953844888 | 0.558742 | 0.576338 | 0.744837 | NISOLDIPINE                       |
| 6.424882  | -0.2032  | 0.029410999 | 2.941099933 | 0.494709 | 0.620805 | 0.77756  | CALCIUM CHLORIDE                  |
| 6.444045  | -0.23997 | 0.029356914 | 2.935691387 | 2.300102 | 0.021442 | 0.078523 | FUSIDIC ACID                      |
| 6.436163  | -0.16422 | 0.02924057  | 2.924056963 | 0.553107 | 0.58019  | 0.748255 | ASCORBYL PALMITATE                |
| 6.437751  | -0.17719 | 0.029140394 | 2.914033377 | 1.119765 | 0.262805 | 0.463827 | SULFAGUANIDINE                    |
| 6.475871  | -0.23888 | 0.028589056 | 2.858905622 | 1.08976  | 0.26744  | 0.469741 | OCTOPAMINE HYDROCHLORIDE          |
| 6.444045  | -0.18994 | 0.028816369 | 2.881636863 | 1.107336 | 0.268149 | 0.468957 | NIFENAZONE                        |
| 6.44248   | -0.17701 | 0.028709848 | 2.87098479  | 0.543068 | 0.587083 | 0.752783 | FOSINOPRIL SODIUM                 |
| 6.409933  | -0.11302 | 0.028670261 | 2.867026125 | 0.785848 | 0.431957 | 0.624927 | TANNIC ACID                       |
| 6.404834  | -0.10304 | 0.028522217 | 2.852221746 | 0.78179  | 0.434338 | 0.626732 | ESZOPICLONE                       |
| 6.40654   | -0.10046 | 0.028515999 | 2.851599866 | 0.622481 | 0.533626 | 0.710559 | Manidipine                        |
| 6.498311  | -0.36111 | 0.028508186 | 2.85081865  | 0.479524 | 0.631566 | 0.78696  | RILUZOLE                          |
| 6.382017  | -0.05274 | 0.02823858  | 2.823857968 | 0.602235 | 0.547018 | 0.721095 | DEXPROPRANOLOL HYDROCHLORIDE (R+) |
| 6.401401  | -0.1491  | 0.027872374 | 2.787237374 | 2.183789 | 0.028978 | 0.098911 | TESTOSTERONE                      |
| 6.487138  | -0.26744 | 0.027861649 | 2.78616489  | 0.527024 | 0.598177 | 0.76102  | LOVASTATIN                        |
| 6.482874  | -0.26857 | 0.027520553 | 2.752055283 | 1.057541 | 0.290265 | 0.494232 | PIPENZOLATE BROMIDE               |
| 6.456366  | -0.27091 | 0.027502044 | 2.750204424 | 0.4626   | 0.643651 | 0.795821 | Valnemulin HCl                    |
| 6.363612  | -0.07153 | 0.027228768 | 2.722876782 | 0.603394 | 0.546253 | 0.720889 | Ferulic Acid                      |
| 6.469822  | -0.23019 | 0.027170568 | 2.717056783 | 0.744741 | 0.456428 | 0.643423 | HYDROXYCHLOROQUINE SULFATE        |
| 6.396974  | -0.08857 | 0.027023491 | 2.702349591 | 0.591321 | 0.564398 | 0.732215 | STRYCHNINE SULFATE                |
| 6.451786  | -0.1949  | 0.026943474 | 2.694347389 | 0.738517 | 0.46602  | 0.646427 | MYCOPHENOLATE MOFETIL             |
| 6.487138  | -0.26063 | 0.026911076 | 2.691107594 | 0.587447 | 0.556904 | 0.729245 | Cabazitaxel                       |
| 6.453318  | -0.19895 | 0.02688022  | 2.688021969 | 0.50846  | 0.611131 | 0.770773 | PHENSUCLAMIDE                     |
| 6.482874  | -0.2588  | 0.026863742 | 2.686374176 | 0.508148 | 0.61135  | 0.770773 | METYPAPONE                        |
| 6.403121  | -0.09969 | 0.026431573 | 2.64315731  | 0.724486 | 0.468768 | 0.655404 | QUINAPRIL HYDROCHLORIDE           |
| 6.462398  | -0.22711 | 0.026281136 | 2.628113647 | 1.009914 | 0.312537 | 0.518814 | TOXOLONE                          |
| 6.40654   | -0.1025  | 0.026219916 | 2.621991561 | 0.559183 | 0.576037 | 0.744775 | ISOCONAZOLE NITRATE               |
| 6.487138  | -0.2772  | 0.026183574 | 2.61835741  | 1.006165 | 0.314336 | 0.520674 | TRICLABENDAZOLE                   |
| 6.472756  | -0.24808 | 0.026080705 | 2.60807048  | 1.002212 | 0.316241 | 0.52214  | METERGOLINE                       |
| 6.436163  | -0.22318 | 0.025988343 | 2.598834318 | 2.036176 | 0.041733 | 0.131815 | BECLOMETHASONE DIPROPIONATE       |
| 6.424882  | -0.2032  | 0.025939572 | 2.593957166 | 0.436318 | 0.662606 | 0.808904 | TROXIPIDE                         |
| 6.469822  | -0.30008 | 0.02582681  | 2.58268102  | 0.572317 | 0.567107 | 0.738076 | Sodium montmorillonite            |
| 6.462398  | -0.21566 | 0.025775701 | 2.577570132 | 0.706508 | 0.479872 | 0.664892 | TRIBROMETHANOL                    |
| 6.49958   | -0.28292 | 0.025525225 | 2.55252499  | 0.59125  | 0.526469 | 0.532215 | TULOBUTEROL HYDROCHLORIDE         |
| 6.453893  | -0.28709 | 0.025426377 | 2.542637708 | 0.427686 | 0.66589  | 0.813669 | EBASTINE                          |
| 6.457882  | -0.20683 | 0.025391323 | 2.539132282 | 0.695973 | 0.486446 |          |                                   |

|          |          |             |             |          |          |          |                                           |
|----------|----------|-------------|-------------|----------|----------|----------|-------------------------------------------|
| 6.434569 | -0.16099 | 0.022444658 | 2.244465846 | 0.424558 | 0.671159 | 0.814877 | VERAPAMIL HYDROCHLORIDE                   |
| 6.409933 | -0.12086 | 0.022366968 | 2.236696813 | 0.859503 | 0.390063 | 0.587466 | TOXAPHENE                                 |
| 6.460898 | -0.2128  | 0.022315733 | 2.231573315 | 0.47592  | 0.634131 | 0.788634 | FLUPHENAZINE HYDROCHLORIDE                |
| 6.498311 | -0.36111 | 0.022197029 | 2.219702901 | 0.373366 | 0.708876 | 0.8357   | FROVATRIPTAN SUCCINATE                    |
| 6.489958 | -0.34315 | 0.022157449 | 2.215744881 | 0.372701 | 0.709371 | 0.835757 | PEMETREXED                                |
| 6.466888 | -0.22491 | 0.022088477 | 2.208847688 | 0.471072 | 0.637589 | 0.791192 | GANCICLOVIR HYDRATE                       |
| 6.448706 | -0.24991 | 0.022053251 | 2.205325051 | 1.727242 | 0.094124 | 0.217193 | METHYLTICHOURACIL                         |
| 6.475671 | -0.2128  | 0.022045249 | 2.204524901 | 0.419948 | 0.676704 | 2.218666 | PENICILLIN G MINE                         |
| 6.506505 | -0.31642 | 0.021970643 | 2.197064299 | 0.844273 | 0.398517 | 0.594697 | ANISODAMINE HYDROBROMIDE                  |
| 6.439333 | -0.17063 | 0.021733095 | 2.173309469 | 0.411098 | 0.681001 | 0.820599 | TOPIRAMATE                                |
| 6.50515  | -0.31368 | 0.021627311 | 2.162731096 | 0.83108  | 0.405929 | 0.60155  | THREONINE (dl)                            |
| 6.485721 | -0.26457 | 0.021618316 | 2.161831593 | 0.408927 | 0.682593 | 0.821547 | BUTYLATED HYDROXYTOLUENE                  |
| 6.445604 | -0.2433  | 0.021376316 | 2.137631552 | 1.674826 | 0.093968 | 0.234793 | CYPROTERONE ACETATE                       |
| 6.382017 | -0.11113 | 0.021335179 | 2.133517879 | 0.472783 | 0.636368 | 0.790354 | Sodium Aescinate                          |
| 6.460898 | -0.2128  | 0.021240149 | 2.124014946 | 0.452981 | 0.650562 | 0.800022 | CARBENOXOLONE SODIUM                      |
| 6.465383 | -0.2219  | 0.021234913 | 2.123491313 | 0.45287  | 0.650643 | 0.800022 | TOLBUTAMIDE                               |
| 6.456366 | -0.2036  | 0.021217723 | 2.121772332 | 0.452503 | 0.650907 | 0.800154 | FENOFIBRATE                               |
| 6.451786 | -0.19038 | 0.021103107 | 2.110310727 | 0.460664 | 0.645004 | 0.796576 | Olaparib (AZD2281, Ku-0059436)            |
| 6.489958 | -0.34341 | 0.02093879  | 2.093878962 | 0.463999 | 0.642648 | 0.795301 | Methanamine Hippurate                     |
| 6.4843   | -0.26169 | 0.020858667 | 2.085866703 | 0.394557 | 0.693177 | 0.82646  | AUROTHIOGLUCOSE                           |
| 6.491362 | -0.34617 | 0.020782539 | 2.078253908 | 0.349574 | 0.726659 | 0.849516 | Baclofen                                  |
| 6.480007 | -0.253   | 0.020761856 | 2.076185572 | 0.392726 | 0.694522 | 0.827125 | OMEPRAZOLE                                |
| 6.463893 | -0.21898 | 0.020675896 | 2.067589239 | 0.440948 | 0.659251 | 0.806908 | SERATRODAST                               |
| 6.468688 | -0.22441 | 0.020382691 | 2.038269073 | 0.558687 | 0.576376 | 0.744837 | ATOVAQUONE                                |
| 6.457882 | -0.27438 | 0.020371499 | 2.037149906 | 0.451428 | 0.651681 | 0.800722 | Felypressin                               |
| 6.439333 | -0.23447 | 0.020236824 | 2.023682446 | 0.448444 | 0.653833 | 0.802403 | Daidzin                                   |
| 6.460898 | -0.22407 | 0.020178267 | 2.017826675 | 0.775397 | 0.438105 | 0.630084 | COUMOPHOS                                 |
| 6.448706 | -0.24991 | 0.019966413 | 1.996641314 | 1.566711 | 0.117182 | 0.274086 | NYLIDRIN HYDROCHLORIDE                    |
| 6.501059 | -0.36702 | 0.019933864 | 1.993386382 | 0.335299 | 0.7374   | 0.855344 | Amfenac Sodium Monohydrate                |
| 6.445604 | -0.18177 | 0.019783953 | 1.978395326 | 0.421926 | 0.673079 | 0.816047 | PIRACETAM                                 |
| 6.436163 | -0.22746 | 0.019760674 | 1.976067428 | 0.332386 | 0.739598 | 0.857117 | METHAMIDOPHOS                             |
| 6.471292 | -0.30324 | 0.019254821 | 1.925482103 | 0.426683 | 0.66961  | 0.813961 | Rabeprazole Related Compound E            |
| 6.459392 | -0.20974 | 0.019217627 | 1.921762723 | 0.409848 | 0.681918 | 0.821317 | LUMIRACOXIB                               |
| 6.503791 | -0.31093 | 0.019164279 | 1.916427938 | 0.736432 | 0.461468 | 0.647852 | ESTRADIOL PROPIONATE                      |
| 6.469822 | -0.29984 | 0.019131187 | 1.91311874  | 0.321797 | 0.747606 | 0.862493 | Halobetasol Propionate                    |
| 6.448706 | -0.24991 | 0.019028329 | 1.902832924 | 1.490862 | 0.135998 | 0.307130 | CINOXACIN                                 |
| 6.477121 | -0.31579 | 0.018946446 | 1.894644646 | 0.417638 | 0.676212 | 0.819473 | Apigenin                                  |
| 6.463893 | -0.21898 | 0.018633562 | 1.863356247 | 0.412916 | 0.673668 | 0.820359 | Isolecithin                               |
| 6.454845 | -0.20052 | 0.018465888 | 1.846588821 | 0.393816 | 0.693717 | 0.826634 | THIORIDAZINE HYDROCHLORIDE                |
| 6.450249 | -0.25775 | 0.018457536 | 1.845753587 | 0.310466 | 0.756207 | 0.868527 | DICHLORVOS                                |
| 6.404834 | -0.16008 | 0.018342015 | 1.834201525 | 0.308523 | 0.757684 | 0.869029 | Proparacaine HCl                          |
| 6.459392 | -0.20974 | 0.018260293 | 1.826029335 | 0.389431 | 0.696957 | 0.828702 | TRIMETHOBENZAMIDE HYDROCHLORIDE           |
| 6.383815 | -0.0553  | 0.018219374 | 1.821937413 | 0.397714 | 0.690841 | 0.82527  | Lesinurad                                 |
| 6.478566 | -0.31865 | 0.018165046 | 1.816504621 | 0.305546 | 0.75995  | 0.870458 | SAXAGLIPTIN                               |
| 6.462398 | -0.21734 | 0.018138552 | 1.813855169 | 0.343104 | 0.73152  | 0.851998 | BETAMETHASONE ACETATE                     |
| 6.466688 | -0.22035 | 0.018125718 | 1.812571766 | 0.39567  | 0.692349 | 0.826337 | Sairasib                                  |
| 6.457882 | -0.20668 | 0.018039544 | 1.803954401 | 0.384723 | 0.700442 | 0.830923 | CANDESARTAN                               |
| 6.472756 | -0.30639 | 0.017998731 | 1.799873089 | 0.398848 | 0.690005 | 0.824538 | Geniposidic Acid                          |
| 6.447158 | -0.18585 | 0.017948957 | 1.794895651 | 0.491978 | 0.622735 | 0.77956  | LETROZOLE                                 |
| 6.475671 | -0.24163 | 0.017927019 | 1.792701944 | 0.491377 | 0.62316  | 0.779902 | LEVAMISOLE HYDROCHLORIDE                  |
| 6.447158 | -0.24661 | 0.01788103  | 1.788102985 | 1.400971 | 0.161223 | 0.338442 | ISOXSUPRINE HYDROCHLORIDE                 |
| 6.445604 | -0.18281 | 0.017879718 | 1.787971776 | 0.490031 | 0.624112 | 0.780364 | BACL OFEN HYDROCHLORIDE (+)               |
| 6.428135 | -0.20607 | 0.017798984 | 1.77989843  | 1.394574 | 0.163144 | 0.341077 | CLOXACILIN SODIUM                         |
| 6.453318 | -0.25973 | 0.017749134 | 1.774913428 | 1.390637 | 0.164335 | 0.342868 | METHIMAZOLE                               |
| 6.49693  | -0.35814 | 0.017730352 | 1.773035246 | 0.298234 | 0.765524 | 0.873716 | Octreotide Acetate                        |
| 6.453318 | -0.19742 | 0.017717149 | 1.771714897 | 0.377848 | 0.705544 | 0.833884 | CINROMIDE                                 |
| 6.453318 | -0.26435 | 0.017618419 | 1.761841943 | 0.296352 | 0.766962 | 0.874553 | PENCICLOVIR                               |
| 6.474216 | -0.23879 | 0.017386844 | 1.738684413 | 0.476571 | 0.633668 | 0.788619 | OXCARBAZEPINE                             |
| 6.454845 | -0.19645 | 0.017373177 | 1.737317734 | 0.379242 | 0.704508 | 0.833429 | Dovitinib (TKI-258) Dilactic Acid         |
| 6.394452 | -0.07644 | 0.017291674 | 1.729167423 | 0.377463 | 0.705829 | 0.834029 | Avagacestat (BMS-708163)                  |
| 6.495544 | -0.28446 | 0.017272888 | 1.727288806 | 0.32673  | 0.743872 | 0.860318 | DIMETHYL FUMARATE                         |
| 6.460898 | -0.2143  | 0.017218134 | 1.721813439 | 0.325694 | 0.744656 | 0.860357 | EDROPHONIUM CHLORIDE                      |
| 6.475671 | -0.31242 | 0.017207663 | 1.720766318 | 0.289442 | 0.772243 | 0.876702 | CETILISAT                                 |
| 6.482874 | -0.2588  | 0.017178785 | 1.717878527 | 0.32495  | 0.745219 | 0.860709 | TOREMIFENE CITRATE                        |
| 6.469822 | -0.23019 | 0.017126773 | 1.712677335 | 0.469933 | 0.639834 | 0.79216  | DOBUTAMINE HYDROCHLORIDE                  |
| 6.414973 | -0.12191 | 0.017045406 | 1.704540638 | 0.32427  | 0.747128 | 0.862332 | FLORFENICOL                               |
| 6.463893 | -0.21898 | 0.017003195 | 1.700319454 | 0.366821 | 0.716888 | 0.841657 | ADENINE                                   |
| 6.475671 | -0.31242 | 0.016745504 | 1.674550394 | 0.281669 | 0.778198 | 0.879083 | TIGECYCLINE                               |
| 6.436163 | -0.16422 | 0.01660231  | 1.660230973 | 0.314045 | 0.753487 | 0.867043 | PREDNISOLONE HEMISUCCINATE                |
| 6.459392 | -0.20978 | 0.016397443 | 1.639744294 | 0.449452 | 0.653106 | 0.802009 | DOCUSATE SODIUM                           |
| 6.456366 | -0.2036  | 0.016345235 | 1.63452346  | 0.348589 | 0.727398 | 0.849516 | TRIOXSALEN                                |
| 6.434569 | -0.21978 | 0.016309111 | 1.630911104 | 1.277812 | 0.201316 | 0.392213 | HYOSCYAMINE                               |
| 6.472756 | -0.24808 | 0.016294375 | 1.629437484 | 0.626149 | 0.531217 | 0.708289 | BENZONATATE                               |
| 6.404834 | -0.09707 | 0.016186398 | 1.618639779 | 0.353336 | 0.723837 | 0.847677 | Lenalidomide (CC-5013)                    |
| 6.481443 | -0.32483 | 0.016128095 | 1.61280948  | 0.271284 | 0.786173 | 0.884078 | ENDOSULFAN                                |
| 6.466688 | -0.29349 | 0.01607764  | 1.607763994 | 0.270435 | 0.788826 | 0.884249 | METHOXYCHLOR                              |
| 6.469822 | -0.29984 | 0.016044095 | 1.604409452 | 0.269871 | 0.78726  | 0.884329 | BENDIOCARB                                |
| 6.471292 | -0.23535 | 0.015905603 | 1.590560313 | 0.300867 | 0.763516 | 0.873175 | BEPRIDIL HYDROCHLORIDE                    |
| 6.414973 | -0.18205 | 0.015846455 | 1.584645484 | 0.351154 | 0.725473 | 0.848816 | Neomycin Sulphate B                       |
| 6.437751 | -0.16743 | 0.015780227 | 1.578022733 | 0.298495 | 0.765325 | 0.873736 | DESLOFETIDINE                             |
| 6.509203 | -0.32189 | 0.015662567 | 1.566256746 | 0.601871 | 0.54726  | 0.721229 | MILTEFOSINE [5mM]                         |
| 6.454845 | -0.20052 | 0.015447115 | 1.544711494 | 0.329435 | 0.741827 | 0.858363 | SULBACTAM                                 |
| 6.465383 | -0.2215  | 0.015414165 | 1.541416516 | 0.4225   | 0.67266  | 0.815925 | TENOXCAM                                  |
| 6.445604 | -0.2433  | 0.015123699 | 1.512369916 | 1.184936 | 0.236043 | 0.433324 | HEXACHLOROPHENE                           |
| 6.463893 | -0.23013 | 0.014923533 | 1.492353341 | 0.573471 | 0.566326 | 0.737246 | NADIFLOXACIN                              |
| 6.382017 | -0.05457 | 0.014871945 | 1.487194466 | 0.281314 | 0.77847  | 0.879083 | FLUOROURACIL                              |
| 6.451786 | -0.1949  | 0.014743658 | 1.474365838 | 0.404122 | 0.686123 | 0.822779 | THIOTEPA                                  |
| 6.451786 | -0.26127 | 0.014728605 | 1.472860571 | 0.326383 | 0.744135 | 0.860328 | Lurasidone hydrochloride                  |
| 6.445604 | -0.2433  | 0.014394964 | 1.43949639  | 1.12784  | 0.259388 | 0.459538 | CARBENICILLIN DISODIUM                    |
| 6.502427 | -0.37024 | 0.014156125 | 1.415612465 | 0.313697 | 0.753751 | 0.867043 | Penicillin G Potassium (Benzylpenicillin) |
| 6.447158 | -0.18492 | 0.014117529 | 1.411752929 | 0.30108  | 0.763354 | 0.873175 | SULFAMETER                                |
| 6.437751 | -0.16248 | 0.013977983 | 1.397798317 | 0.305128 | 0.760269 | 0.870628 | Acitretin                                 |
| 6.447158 | -0.2511  | 0.013730959 | 1.373095923 | 0.230962 | 0.817344 | 0.903122 | METHYLMETHANE SULFONATE                   |
| 6.487138 | -0.2772  | 0.01370438  | 1.37043871  | 0.526623 | 0.598496 | 0.761076 | ALLYLISOTHIOCYANATE                       |
| 6.460898 | -0.28065 | 0.01363999  | 1.363999371 | 0.229211 | 0.750325 | 0.86845  | PHENFORMIN HYDROCHLORIDE                  |
| 6.453318 | -0.1979  | 0.013519744 | 1.351974414 | 0.370574 | 0.710955 | 0.839694 | OXFENDAZOLE                               |
| 6.491362 | -0.28576 | 0.013471097 | 1.347109716 | 0.517658 | 0.604697 | 0.765261 | PENTAMIDINE ISETHIONATE                   |
| 6.436163 | -0.22746 | 0.013350435 | 1.335043487 | 0.224562 | 0.82232  | 0.905436 | LIQUIDON                                  |
| 6.495544 | -0.35543 | 0.012774425 | 1.277442542 | 0.283079 | 0.777117 | 0.87833  | Leuteolin                                 |
| 6.469822 | -0.23237 | 0.012773933 | 1.27739326  | 0.241629 | 0.809068 | 0.898044 | RIMANTADINE HYDROCHLORIDE                 |
| 6.488551 | -0.2703  | 0.012706764 | 1.270676393 | 0.240358 | 0.810053 | 0.898135 | ACADESINE                                 |
| 6.49693  | -0.28727 | 0.012413229 | 1.241322943 | 0.234806 | 0.81436  | 0.900739 | CITRIC ACID                               |
| 6.440909 | -0.23329 | 0.012323241 | 1.232323406 | 0.966218 | 0.333935 | 0.537826 | MESTRANOL                                 |
| 6.471292 | -0.23389 | 0.012284884 | 1.228488391 | 0.261996 | 0.793325 | 0.888607 | TETRAHYDROZOLINE HYDROCHLORIDE            |
| 6.462398 | -0.21584 | 0.011988107 | 1.198810727 | 0.255666 | 0.798209 | 0.891542 | THIOGUANINE                               |
| 6.468347 | -0.2273  | 0.011845561 | 1.184556146 | 0.324685 | 0.745419 | 0.860746 | ALBENDAZOLE                               |
| 6.477121 | -0.31579 | 0.011785752 | 1.178575173 | 0.261117 | 0.793962 | 0.889126 | Methylcobalamin                           |
| 6.453318 | -0.19895 | 0.011656745 | 1.165674487 | 0.220496 | 0.825485 | 0.906776 | ALLYLISOTHIOCYANATE                       |
| 6.474216 | -0.23879 | 0.011603957 | 1.160395721 | 0.318211 | 0.750325 | 0.86845  | PHENFORMIN HYDROCHLORIDE                  |
| 6.468347 | -0.22915 | 0.011441398 | 1.144139833 | 0.43986  | 0.660183 | 0.806908 | N-METHYL - (E)EPHEDRINE [1R,2S]           |

|           |          |             |             |          |          |          |                                       |
|-----------|----------|-------------|-------------|----------|----------|----------|---------------------------------------|
| 6.471292  | -0.23306 | 0.009205579 | 0.920557903 | 0.252324 | 0.800791 | 0.893062 | PERPHENAZINE                          |
| 6.462398  | -0.28388 | 0.009104865 | 0.910486486 | 0.153149 | 0.878281 | 0.933333 | METHOMYL                              |
| 6.463893  | -0.21888 | 0.009069729 | 0.906972904 | 0.193427 | 0.846625 | 0.917183 | TRICETIN                              |
| 6.451786  | -0.19038 | 0.009030796 | 0.903079597 | 0.197135 | 0.843722 | 0.916389 | Benidipine HCl                        |
| 6.436163  | -0.17398 | 0.008980455 | 0.898045535 | 0.345095 | 0.730023 | 0.851416 | PRANOPROFEN                           |
| 6.4133    | -0.11792 | 0.008970978 | 0.897097802 | 0.169693 | 0.865252 | 0.926723 | BENURESTAT                            |
| 6.44248   | -0.24104 | 0.008874366 | 0.887436599 | 0.149272 | 0.891339 | 0.934526 | RIVAROXABAN                           |
| 6.4448706 | -0.20491 | 0.008837644 | 0.883764422 | 0.692355 | 0.488714 | 0.672729 | OXYQUINOLINE HEMISULFATE              |
| 6.468922  | -0.23091 | 0.008545593 | 0.854559297 | 0.182249 | 0.855387 | 0.922795 | CEFAMANDOLE SODIUM                    |
| 6.463893  | -0.21859 | 0.008378917 | 0.837891653 | 0.229665 | 0.818352 | 0.903454 | CYCLOBENZAPRINE HYDROCHLORIDE         |
| 6.456366  | -0.21489 | 0.008253321 | 0.825332097 | 0.317153 | 0.751127 | 0.865191 | QUININE ETHYL CARBONATE               |
| 6.460898  | -0.2128  | 0.008244206 | 0.824420606 | 0.175821 | 0.860434 | 0.924143 | BEZAFIBRATE                           |
| 6.458485  | -0.20052 | 0.008229396 | 0.822939643 | 0.175506 | 0.860682 | 0.924143 | RETODRINE HYDROCHLORIDE               |
| 6.457882  | -0.26946 | 0.008183512 | 0.818351228 | 0.641175 | 0.521409 | 0.700319 | PREDNISONE                            |
| 6.487138  | -0.26744 | 0.008102929 | 0.810292915 | 0.153273 | 0.878183 | 0.933333 | AMINOREX                              |
| 6.466868  | -0.22639 | 0.007973068 | 0.797306755 | 0.150817 | 0.88012  | 0.933931 | BENZBROMARONE                         |
| 6.418301  | -0.13781 | 0.007962734 | 0.796273351 | 0.305987 | 0.759615 | 0.870458 | CEPHARANTHINE                         |
| 6.463893  | -0.22037 | 0.007955348 | 0.79553476  | 0.150481 | 0.880385 | 0.933955 | IOSOFAMIDE                            |
| 6.414973  | -0.18189 | 0.007772011 | 0.777201096 | 0.13073  | 0.895989 | 0.942759 | PROPRARGITE                           |
| 6.419956  | -0.19277 | 0.007745192 | 0.774519159 | 0.171632 | 0.863727 | 0.925745 | Scopolamine butylbromide              |
| 6.469822  | -0.23237 | 0.00770624  | 0.770624005 | 0.145769 | 0.884103 | 0.935501 | NEOSTIGMINE METHYLSULFATE             |
| 6.495544  | -0.35516 | 0.007675947 | 0.767594707 | 0.129114 | 0.897269 | 0.943716 | CETALKONIUM CHLORIDE                  |
| 6.468688  | -0.22491 | 0.007625456 | 0.76254578  | 0.24123  | 0.870804 | 0.930409 | SULFINPYRAZONE                        |
| 6.451786  | -0.19431 | 0.007548343 | 0.754834349 | 0.160981 | 0.872108 | 0.931161 | ACEBUTOLOL HYDROCHLORIDE              |
| 6.456366  | -0.2036  | 0.007243217 | 0.724321675 | 0.154474 | 0.877236 | 0.933191 | DOXYFYLIN                             |
| 6.494155  | -0.35244 | 0.007171887 | 0.717188695 | 0.158927 | 0.873726 | 0.931817 | Tauroursodeoxycholic Acid             |
| 6.458485  | -0.20089 | 0.00710204  | 0.710203987 | 0.194666 | 0.845654 | 0.916946 | OSELTAMIVIR PHOSPHATE                 |
| 6.50515   | -0.37582 | 0.007044169 | 0.704416941 | 0.118487 | 0.905682 | 0.948256 | Emsolol                               |
| 6.453318  | -0.1979  | 0.006933002 | 0.693300162 | 0.190033 | 0.849284 | 0.919309 | MOMETASONE FUROATE                    |
| 6.485721  | -0.33429 | 0.006891769 | 0.689176896 | 0.15272  | 0.878619 | 0.933498 | CM 346(Obenoxazine)                   |
| 6.458485  | -0.26299 | 0.006891427 | 0.689142694 | 0.53994  | 0.589238 | 0.754268 | SPARTEINE SULFATE                     |
| 6.40654   | -0.1639  | 0.006826061 | 0.682606052 | 0.151264 | 0.879767 | 0.933887 | Valpramide                            |
| 6.447158  | -0.24661 | 0.006775369 | 0.677536923 | 0.530847 | 0.595525 | 0.758668 | GUANABENZ ACETATE                     |
| 6.421604  | -0.1304  | 0.006644081 | 0.664408086 | 0.145035 | 0.884683 | 0.935863 | Ephothilone B (EPO906, Patupilone)    |
| 6.50515   | -0.3761  | 0.006497447 | 0.649744651 | 0.143982 | 0.885515 | 0.936285 | D-Stachyose tetrahydrate              |
| 6.462874  | -0.28857 | 0.006344772 | 0.634477163 | 0.243813 | 0.807376 | 0.898044 | PYRITINOL                             |
| 6.458485  | -0.21191 | 0.006277569 | 0.627756793 | 0.24123  | 0.808737 | 0.891335 | SAMBUTEROL HYDROCHLORIDE              |
| 6.460898  | -0.2128  | 0.006262456 | 0.626245578 | 0.133557 | 0.893753 | 0.941439 | BEKANAMYCIN SULFATE                   |
| 6.440909  | -0.17383 | 0.00622246  | 0.622459993 | 0.117743 | 0.906271 | 0.948316 | ALPRENOLOL HYDROCHLORIDE              |
| 6.474216  | -0.23982 | 0.006009138 | 0.600913848 | 0.128155 | 0.898026 | 0.943739 | CHOLESTEROL                           |
| 6.458485  | -0.26763 | 0.005890631 | 0.589063113 | 0.099084 | 0.921072 | 0.956564 | TIOTROPUM BROMIDE                     |
| 6.511883  | -0.32731 | 0.005791978 | 0.579197828 | 0.22257  | 0.82387  | 0.906169 | GENISTEIN                             |
| 6.409933  | -0.12086 | 0.005704692 | 0.57046919  | 0.219216 | 0.826482 | 0.907526 | GALLIC ACID                           |
| 6.502427  | -0.36996 | 0.00554544  | 0.554543957 | 0.093277 | 0.925683 | 0.959024 | Flavoxate HCl                         |
| 6.394452  | -0.13789 | 0.005317332 | 0.531733239 | 0.117831 | 0.906202 | 0.948316 | Mitiglinide calcium                   |
| 6.503791  | -0.37317 | 0.005091788 | 0.509178813 | 0.112833 | 0.910163 | 0.950058 | Saikosaponin A                        |
| 6.448706  | -0.18806 | 0.00493506  | 0.493505987 | 0.105248 | 0.916179 | 0.954004 | RESERPINE                             |
| 6.421604  | -0.1304  | 0.004788886 | 0.47888856  | 0.104537 | 0.916743 | 0.954182 | Pacritinib (SB1518)                   |
| 6.478566  | -0.3189  | 0.004616013 | 0.461601321 | 0.10229  | 0.918527 | 0.954895 | Sibutramine                           |
| 6.481443  | -0.32483 | 0.004588556 | 0.458855591 | 0.077182 | 0.938479 | 0.967582 | TOSUFLOXACIN TOLUENESULFONATE HYDRATE |
| 6.465593  | -0.2215  | 0.004519842 | 0.451984205 | 0.123868 | 0.901404 | 0.945735 | FAMCICLOVIR                           |
| 6.465383  | -0.2215  | 0.004397705 | 0.439770506 | 0.12054  | 0.904055 | 0.947352 | RAMIPRIL                              |
| 6.458485  | -0.21181 | 0.004360861 | 0.436086072 | 0.167576 | 0.866917 | 0.927998 | HEXTIDINE                             |
| 6.458485  | -0.20052 | 0.004336454 | 0.43364539  | 0.092482 | 0.926315 | 0.959291 | SULFADIAZINE                          |
| 6.458485  | -0.26299 | 0.004314867 | 0.431486707 | 0.338068 | 0.735312 | 0.854076 | L-PHENYLEPHRINE HYDROCHLORIDE         |
| 6.460898  | -0.2128  | 0.00431113  | 0.431113038 | 0.091942 | 0.926744 | 0.959541 | FENOPROFEN                            |
| 6.478566  | -0.2473  | 0.004277085 | 0.427708456 | 0.117234 | 0.906674 | 0.948402 | LABELALOL HYDROCHLORIDE               |
| 6.458485  | -0.26299 | 0.00427205  | 0.427204956 | 0.334713 | 0.737841 | 0.855662 | CHLORAMPHENICOL PALMITATE             |
| 6.507856  | -0.38164 | 0.004027579 | 0.402757912 | 0.067746 | 0.945988 | 0.972582 | MOEXIPRIL HYDROCHLORIDE               |
| 6.456366  | -0.20386 | 0.003900005 | 0.390000456 | 0.106899 | 0.914869 | 0.952834 | TILMICOSIN                            |
| 6.462874  | -0.2588  | 0.003698871 | 0.369887067 | 0.069967 | 0.94422  | 0.971017 | TRANEXAMIC ACID                       |
| 6.468347  | -0.22792 | 0.00369779  | 0.369790007 | 0.078862 | 0.937143 | 0.967031 | NEPAFENAC                             |
| 6.514548  | -0.33271 | 0.003482341 | 0.348234056 | 0.133817 | 0.893547 | 0.941439 | BRUCINE                               |
| 6.480007  | -0.25011 | 0.003464233 | 0.346423254 | 0.094954 | 0.924351 | 0.958226 | TAGATOSE                              |
| 6.478566  | -0.2436  | 0.003327003 | 0.332700272 | 0.072626 | 0.942104 | 0.970342 | Tivantinib (ARO 197)                  |
| 6.498311  | -0.28006 | 0.00326706  | 0.326705906 | 0.058036 | 0.95372  | 0.976481 | MINOXIDIL                             |
| 6.468922  | -0.50008 | 0.003030369 | 0.303036923 | 0.067226 | 0.946402 | 0.972617 | Mydobutanil                           |
| 6.514548  | -0.33271 | 0.002999541 | 0.299954062 | 0.115264 | 0.908236 | 0.949207 | ARTEMISININ                           |
| 6.453318  | -0.25973 | 0.002832097 | 0.283209728 | 0.221894 | 0.824397 | 0.906358 | SALICYLANILIDE                        |
| 6.49276   | -0.27882 | 0.002817921 | 0.281792128 | 0.053303 | 0.95749  | 0.978895 | ISOVALERAMIDE                         |
| 6.475671  | -0.31242 | 0.002757448 | 0.275744774 | 0.046382 | 0.963006 | 0.981342 | Clorprenaline HCl                     |
| 6.465383  | -0.28544 | 0.002714646 | 0.271464604 | 0.212691 | 0.831568 | 0.909749 | ETHAMBUTOL HYDROCHLORIDE              |
| 6.474216  | -0.23879 | 0.002667479 | 0.266747941 | 0.073115 | 0.941714 | 0.970224 | CEFDIRIN                              |
| 6.499687  | -0.29285 | 0.002661206 | 0.26612062  | 0.050339 | 0.959852 | 0.979949 | D-(+)-MALTOSE                         |
| 6.477121  | -0.25692 | 0.002502688 | 0.250268827 | 0.096172 | 0.923384 | 0.957805 | CYCACETIDE                            |
| 6.499687  | -0.29285 | 0.002472672 | 0.247267248 | 0.046772 | 0.962695 | 0.981342 | EPRODISATE DISODIUM                   |
| 6.459392  | -0.20978 | 0.002461241 | 0.246124066 | 0.067462 | 0.946214 | 0.972617 | GLIMEPIRIDE                           |
| 6.506505  | -0.37901 | 0.002460235 | 0.246023528 | 0.054518 | 0.958522 | 0.978109 | Alodan                                |
| 6.460898  | -0.2128  | 0.002334655 | 0.233465528 | 0.049979 | 0.960289 | 0.9802   | FEROXACIN                             |
| 6.468347  | -0.2273  | 0.002313848 | 0.231384784 | 0.063422 | 0.94943  | 0.974946 | NILOTAMID                             |
| 6.448706  | -0.24891 | 0.002298395 | 0.229838452 | 0.180077 | 0.857032 | 0.923049 | CEFTRIOXIM SODIUM                     |
| 6.480007  | -0.25011 | 0.002218627 | 0.221862699 | 0.060812 | 0.951509 | 0.975843 | CEFTIOFUR HYDROCHLORIDE               |
| 6.478566  | -0.2473  | 0.002190949 | 0.219094943 | 0.060054 | 0.952113 | 0.975867 | PROPRANOLOL HYDROCHLORIDE (+/-)       |
| 6.431364  | -0.1545  | 0.002143812 | 0.214381191 | 0.040552 | 0.967653 | 0.983894 | NICOTINE BITARTRATE                   |
| 6.389166  | -0.06593 | 0.002043832 | 0.204383213 | 0.044615 | 0.964414 | 0.982256 | Veliparib (ABT-888)                   |
| 6.471292  | -0.23389 | 0.00196648  | 0.196648002 | 0.041938 | 0.966548 | 0.983536 | FENSPIRIDE HYDROCHLORIDE              |
| 6.472756  | -0.23686 | 0.001895665 | 0.189566539 | 0.040428 | 0.967752 | 0.983894 | FOSFOMYCIN CALCIUM                    |
| 6.383815  | -0.05639 | 0.001706312 | 0.170631178 | 0.03639  | 0.970971 | 0.985373 | VIDARABINE                            |
| 6.426511  | -0.20261 | 0.001671007 | 0.167100738 | 0.130923 | 0.895836 | 0.942759 | MINOCYCLINE HYDROCHLORIDE             |
| 6.4843    | -0.25499 | 0.001603307 | 0.160330732 | 0.034999 | 0.972081 | 0.985373 | Conivaptan HCl                        |
| 6.507856  | -0.38164 | 0.001602861 | 0.160286112 | 0.026961 | 0.978491 | 0.987827 | BUTENAFINE HYDROCHLORIDE              |
| 6.485721  | -0.26129 | 0.001526213 | 0.152621315 | 0.041833 | 0.966632 | 0.983536 | OXICONAZOLE NITRATE                   |
| 6.457882  | -0.26946 | 0.001513036 | 0.151303639 | 0.118546 | 0.905635 | 0.948256 | CAFFEINE                              |
| 6.4843    | -0.26169 | 0.001443913 | 0.144391259 | 0.027313 | 0.97821  | 0.987827 | IODOQUINOL                            |
| 6.468688  | -0.22441 | 0.001414553 | 0.141455313 | 0.038772 | 0.969072 | 0.984517 | DIRITHROMYCIN                         |
| 6.474216  | -0.23982 | 0.001356934 | 0.135693433 | 0.028836 | 0.976913 | 0.986937 | LIOTHYRONINE                          |
| 6.474216  | -0.23879 | 0.001201337 | 0.120136998 | 0.032929 | 0.973731 | 0.985572 | HYCANTHONE                            |
| 6.448706  | -0.18888 | 0.001096347 | 0.109634709 | 0.030051 | 0.976027 | 0.986884 | CLOPIDOGREL SULFATE                   |
| 6.471292  | -0.23535 | 0.000999623 | 0.099962312 | 0.018909 | 0.984914 | 0.991888 | ARIPIRAZOLE                           |
| 6.503791  | -0.30116 | 0.000972751 | 0.097275059 | 0.0184   | 0.98532  | 0.99205  | NIKETHAMIDE                           |
| 6.515874  | -0.33539 | 0.000951623 | 0.09516231  | 0.036568 | 0.970829 | 0.985373 | VANITOLID                             |
| 6.465383  | -0.22339 | 0.000786115 | 0.078611483 | 0.01487  | 0.988136 | 0.994155 | TRIENTINE HYDROCHLORIDE               |
| 6.471292  | -0.23535 | 0.00073212  | 0.073211976 | 0.013849 | 0.988951 | 0.994525 | CHLORMEZANONE                         |
| 6.510545  | -0.38742 | 0.00056146  | 0.056146002 | 0.009444 | 0.992465 | 0.995381 | Salmon Calcitonin Acetate             |
| 6.482874  | -0.25572 | 0.000499055 | 0.04990553  | 0.013679 | 0.989086 | 0.994525 | MIGLITOL                              |
| 6.487138  | -0.33734 | 0.000244881 | 0.024488072 | 0.005427 | 0.99567  | 0.99732  | Protocatechuic acid                   |
| 6.49687   | -0.28557 | 0.000243359 | 0.024335855 | 0.005312 | 0.995761 | 0.99732  | Anisotropine Methylbromide            |
| 6.462874  | -0.26857 | 0.000115249 | 0.011524861 | 0.004429 | 0.996466 | 0.997636 | EPROBEMIDE                            |
| 6.49687   | -0.28009 | 5.67E-05    | 0.00567394  | 0.001237 | 0.999013 | 0.999599 | Benzodofetilene HCl                   |
| 6.396974  | -0.08857 | -6.32E-05   | 0.006319792 | -0.00135 | 0.998925 | 0.999599 | MOMENSIN SODIUM                       |
| 6.474216  | -0.24127 | -0.00029    |             |          |          |          |                                       |

|          |          |              |              |          |          |          |                                                     |
|----------|----------|--------------|--------------|----------|----------|----------|-----------------------------------------------------|
| 6.457882 | -0.26946 | -0.001918647 | -0.191864729 | -0.15033 | 0.880508 | 0.933955 | ERGOCALCIFEROL                                      |
| 6.498311 | -0.29006 | -0.001924015 | -0.192401451 | -0.03639 | 0.970968 | 0.985373 | ADRENALONE HYDROCHLORIDE                            |
| 6.478566 | -0.2473  | -0.002055807 | -0.205580712 | -0.05635 | 0.955063 | 0.977203 | DOXAPRAM HYDROCHLORIDE                              |
| 6.477121 | -0.31554 | -0.002139609 | -0.213960926 | -0.03599 | 0.971291 | 0.985373 | ESCLULIN MONOHYDRATE                                |
| 6.459392 | -0.20978 | -0.002231095 | -0.223109464 | -0.06115 | 0.951237 | 0.975823 | ZOLPIDEM                                            |
| 6.40824  | -0.10787 | -0.002240055 | -0.224005545 | -0.04237 | 0.966202 | 0.983536 | ETOMIDATE                                           |
| 6.472756 | -0.23896 | -0.002249699 | -0.224969938 | -0.04798 | 0.961733 | 0.981007 | SUCCINYL SULTHAZOLE                                 |
| 6.474216 | -0.22471 | -0.00224671  | -0.224671461 | -0.02735 | 0.950285 | 0.975355 | AZITHROMYCIN                                        |
| 6.468822 | -0.23091 | -0.002401291 | -0.240129079 | -0.05121 | 0.959157 | 0.979603 | DIHYDROSTREPTOMYCIN SESQUISULFATE [5mM/10% aq DMSO] |
| 6.459392 | -0.27268 | -0.002719553 | -0.271955279 | -0.21308 | 0.831268 | 0.909616 | BENZOCAINE                                          |
| 6.454845 | -0.26299 | -0.002726304 | -0.272630445 | -0.2136  | 0.830855 | 0.909505 | ACETYLCHOLINE CHLORIDE                              |
| 6.49276  | -0.27882 | -0.002726677 | -0.272667653 | -0.05158 | 0.958866 | 0.979603 | ZAPRINAST                                           |
| 6.472756 | -0.23686 | -0.002793701 | -0.279370066 | -0.05958 | 0.95249  | 0.975935 | LEVOTHYROXINE SODIUM                                |
| 6.475671 | -0.24278 | -0.002889419 | -0.288941942 | -0.06162 | 0.950864 | 0.975636 | TETRACAINE HYDROCHLORIDE                            |
| 6.463893 | -0.21888 | -0.002919555 | -0.291954954 | -0.06226 | 0.950352 | 0.975355 | CEFEPIME HYDROCHLORIDE                              |
| 6.459392 | -0.20978 | -0.002963087 | -0.296308708 | -0.08122 | 0.935269 | 0.966149 | ARGININE HYDROCHLORIDE                              |
| 6.462398 | -0.28388 | -0.003046232 | -0.304623193 | -0.05124 | 0.959135 | 0.979603 | CARMUSTINE                                          |
| 6.472756 | -0.23686 | -0.003107435 | -0.310743516 | -0.06627 | 0.947162 | 0.973203 | SPARFLOXACIN                                        |
| 6.469822 | -0.23237 | -0.003120567 | -0.312056727 | -0.05903 | 0.95293  | 0.975995 | AMINOPENTAMIDE SULFATE                              |
| 6.450249 | -0.25319 | -0.003130306 | -0.313030567 | -0.24526 | 0.806257 | 0.897399 | HEXYLRESORCINOL                                     |
| 6.457882 | -0.26946 | -0.003137767 | -0.313776684 | -0.24584 | 0.805804 | 0.897285 | METHANAMINE                                         |
| 6.454845 | -0.21181 | -0.003148836 | -0.314883633 | -0.121   | 0.903689 | 0.94722  | HYDROXYTOLUIC ACID                                  |
| 6.451786 | -0.25847 | -0.003172385 | -0.324728474 | -0.25442 | 0.799168 | 0.882225 | DOPAMINE HYDROCHLORIDE                              |
| 6.394452 | -0.13789 | -0.003294621 | -0.329462117 | -0.07301 | 0.9418   | 0.970224 | Menadiol Diacetate                                  |
| 6.424882 | -0.13972 | -0.003512342 | -0.351234183 | -0.07491 | 0.940289 | 0.969058 | WARFARIN                                            |
| 6.477121 | -0.31579 | -0.003534921 | -0.353492128 | -0.07833 | 0.937563 | 0.967059 | Proanthocyanidins                                   |
| 6.501059 | -0.30539 | -0.003542606 | -0.354260619 | -0.13613 | 0.891716 | 0.94067  | NIALAMIDE                                           |
| 6.463893 | -0.21859 | -0.003600642 | -0.360064159 | -0.09869 | 0.921382 | 0.956564 | TRANILAST                                           |
| 6.513218 | -0.33002 | -0.003727068 | -0.372706797 | -0.14322 | 0.886115 | 0.936604 | MEBHYDROLIN                                         |
| 6.507856 | -0.38164 | -0.003817492 | -0.381749196 | -0.06421 | 0.948801 | 0.974567 | CHLORDANE                                           |
| 6.510545 | -0.3246  | -0.003831449 | -0.383144943 | -0.14723 | 0.882949 | 0.935188 | GLICLAZIDE                                          |
| 6.474216 | -0.23982 | -0.00384829  | -0.384829023 | -0.08207 | 0.93459  | 0.965907 | FENOTEROL HYDROBROMIDE                              |
| 6.459392 | -0.27268 | -0.003910753 | -0.391075312 | -0.30641 | 0.759296 | 0.870292 | ETHYLENEDIAMINE TETRACETIC ACID                     |
| 6.453318 | -0.25973 | -0.004062135 | -0.406213475 | -0.31827 | 0.750283 | 0.8645   | CICLOPIROX OLAMINE                                  |
| 6.459392 | -0.20978 | -0.004089322 | -0.408932155 | -0.11209 | 0.910754 | 0.950481 | CLIOQUINOL                                          |
| 6.454845 | -0.26299 | -0.004094404 | -0.409440411 | -0.32079 | 0.748366 | 0.862786 | MAFFENIDE HYDROCHLORIDE                             |
| 6.448706 | -0.24991 | -0.004133872 | -0.413387118 | -0.32389 | 0.746023 | 0.861249 | DOXYCYCLINE HYDROCHLORIDE                           |
| 6.449007 | -0.26247 | -0.004125261 | -0.412526724 | -0.25542 | 0.87352  | 0.959117 | METHOPRENE (S)                                      |
| 6.445604 | -0.18281 | -0.004153167 | -0.415316704 | -0.11384 | 0.909366 | 0.949807 | AZTREGONAM                                          |
| 6.466868 | -0.29349 | -0.004159885 | -0.415988498 | -0.06997 | 0.944216 | 0.971017 | SORBITOL                                            |
| 6.450249 | -0.25796 | -0.004237753 | -0.423775292 | -0.09391 | 0.925182 | 0.9587   | Finansartan(BR-A-657)                               |
| 6.437751 | -0.23107 | -0.004256254 | -0.425625414 | -0.09432 | 0.924857 | 0.958556 | PAMBA                                               |
| 6.447158 | -0.18585 | -0.004315311 | -0.431531084 | -0.11828 | 0.905844 | 0.948256 | RESORCINOL MONOACETATE                              |
| 6.456366 | -0.26623 | -0.004453744 | -0.445374415 | -0.34895 | 0.727128 | 0.849516 | METOPROLOL TARTRATE                                 |
| 6.506505 | -0.31642 | -0.004487554 | -0.448755385 | -0.18013 | 0.85705  | 0.923049 | CARNITINE (dl) HYDROCHLORIDE                        |
| 6.454845 | -0.26763 | -0.004489702 | -0.448970151 | -0.07888 | 0.937125 | 0.967031 | PRAXADINE HYDROCHLORIDE                             |
| 6.457882 | -0.26946 | -0.004765622 | -0.476562207 | -0.37338 | 0.708862 | 0.8357   | PARGYLINE HYDROCHLORIDE                             |
| 6.487138 | -0.33734 | -0.004872768 | -0.487276843 | -0.10798 | 0.914012 | 0.952522 | 2-Methoxyestradiol                                  |
| 6.456366 | -0.27091 | -0.004931432 | -0.493143188 | -0.08295 | 0.933892 | 0.965682 | ACEPROMAZINE MALEATE                                |
| 6.468347 | -0.23915 | -0.00496062  | -0.496061987 | -0.19062 | 0.848821 | 0.919002 | RACECADOTRIL                                        |
| 6.472756 | -0.23205 | -0.005050469 | -0.505046887 | -0.11025 | 0.912213 | 0.951422 | Trametilmb (SSK 1120212)                            |
| 6.460898 | -0.2143  | -0.005102934 | -0.510293399 | -0.09653 | 0.923103 | 0.957708 | ROCURONIUM BROMIDE                                  |
| 6.457882 | -0.26946 | -0.005238809 | -0.523880825 | -0.41046 | 0.68147  | 0.82087  | PROCAINAMIDE HYDROCHLORIDE                          |
| 6.459392 | -0.27268 | -0.005363992 | -0.536399192 | -0.42027 | 0.674291 | 0.817101 | CHLORAMBUCIL                                        |
| 6.478566 | -0.24865 | -0.005374998 | -0.537499782 | -0.11463 | 0.908738 | 0.949345 | ABACAIVR SULFATE                                    |
| 6.465383 | -0.22339 | -0.005415984 | -0.541598445 | -0.10245 | 0.918402 | 0.954895 | OXOLINIC ACID                                       |
| 6.488551 | -0.28006 | -0.005633808 | -0.563380838 | -0.21649 | 0.828604 | 0.908254 | ETHENZAMIDE                                         |
| 6.469693 | -0.29703 | -0.005648315 | -0.564831517 | -0.21705 | 0.82817  | 0.908254 | PROPOXUR                                            |
| 6.466868 | -0.23616 | -0.005654159 | -0.565415942 | -0.21727 | 0.827995 | 0.908254 | OXOLAMINE CITRATE                                   |
| 6.49276  | -0.2718  | -0.005757275 | -0.575727491 | -0.12568 | 0.899988 | 0.94498  | Pimavanserin                                        |
| 6.447158 | -0.18648 | -0.005814794 | -0.581479384 | -0.10999 | 0.912416 | 0.95144  | BISOCTRIZOLE                                        |
| 6.459392 | -0.27268 | -0.005889115 | -0.588911545 | -0.46141 | 0.644505 | 0.796315 | CLINDAMYCIN HYDROCHLORIDE                           |
| 6.465383 | -0.22339 | -0.005982889 | -0.598288903 | -0.11317 | 0.909895 | 0.95     | METHSUXIMIDE                                        |
| 6.472756 | -0.23593 | -0.006008151 | -0.600815052 | -0.16468 | 0.869194 | 0.929464 | BEMOTRIZINOL                                        |
| 6.506505 | -0.37901 | -0.006036828 | -0.603682846 | -0.13377 | 0.893581 | 0.941439 | Micafungin                                          |
| 6.478566 | -0.23006 | -0.006125614 | -0.612561395 | -0.11587 | 0.907755 | 0.948952 | CYCLOAMICIN                                         |
| 6.489656 | -0.26623 | -0.006152386 | -0.615238638 | -0.1343  | 0.893164 | 0.941439 | Pomalidomide                                        |
| 6.465383 | -0.2174  | -0.00623202  | -0.623201961 | -0.13604 | 0.89179  | 0.94067  | Entrectinib (RXD-101)                               |
| 6.457882 | -0.26946 | -0.006240019 | -0.624001914 | -0.4889  | 0.62491  | 0.780566 | NORETHINDRONE                                       |
| 6.471292 | -0.23306 | -0.006276922 | -0.627692191 | -0.17205 | 0.863399 | 0.925586 | ATOMOXETINE HYDROCHLORIDE                           |
| 6.501059 | -0.29563 | -0.006296617 | -0.629661747 | -0.11911 | 0.905192 | 0.948155 | CALCIUM GLUCEPTATE                                  |
| 6.514548 | -0.33271 | -0.006316121 | -0.631612092 | -0.24271 | 0.808229 | 0.898044 | FIPEXIDE HYDROCHLORIDE                              |
| 6.460898 | -0.27588 | -0.00636147  | -0.636147007 | -0.49842 | 0.618189 | 0.775441 | CAMPHOR                                             |
| 6.509203 | -0.38453 | -0.006447111 | -0.644711066 | -0.10844 | 0.913644 | 0.952332 | EPINASTINE HYDROCHLORIDE                            |
| 6.480007 | -0.25157 | -0.006703372 | -0.670337155 | -0.14296 | 0.866321 | 0.936629 | DEXIBUPROFEN                                        |
| 6.481443 | -0.25292 | -0.006711395 | -0.671139517 | -0.18396 | 0.854046 | 0.92193  | DERACOXIB                                           |
| 6.428135 | -0.14632 | -0.006865681 | -0.686568111 | -0.14642 | 0.883588 | 0.935375 | DIAPERIDINE                                         |
| 6.453318 | -0.20872 | -0.006961301 | -0.696130109 | -0.2675  | 0.789081 | 0.885209 | TIOPRONIN                                           |
| 6.463893 | -0.28732 | -0.007042083 | -0.704208284 | -0.15605 | 0.875993 | 0.932644 | Isoprosinone                                        |
| 6.469822 | -0.23019 | -0.007157574 | -0.715757361 | -0.19619 | 0.844463 | 0.918416 | CEPHALOTHIN SODIUM                                  |
| 6.466868 | -0.22491 | -0.007215288 | -0.72152878  | -0.15516 | 0.876697 | 0.932812 | OLSALAZINE SODIUM                                   |
| 6.469693 | -0.35841 | -0.007285806 | -0.728580644 | -0.16145 | 0.871737 | 0.931017 | Geniposide                                          |
| 6.460898 | -0.28065 | -0.007371198 | -0.737119819 | -0.12399 | 0.901325 | 0.945735 | Triflusal                                           |
| 6.468347 | -0.2273  | -0.007420038 | -0.742003822 | -0.20338 | 0.838836 | 0.913071 | AMITRAZ                                             |
| 6.511883 | -0.32731 | -0.007581171 | -0.758117076 | -0.29132 | 0.770803 | 0.876702 | BERBERINE CHLORIDE                                  |
| 6.463893 | -0.21859 | -0.007611745 | -0.761174498 | -0.20864 | 0.834732 | 0.911847 | IOPANIC ACID                                        |
| 6.491362 | -0.26902 | -0.007639381 | -0.763938064 | -0.16676 | 0.867558 | 0.928269 | Lonafarnib                                          |
| 6.513218 | -0.33002 | -0.007760962 | -0.776096193 | -0.29823 | 0.765525 | 0.873716 | DIPYROCETYL                                         |
| 6.495544 | -0.35516 | -0.007809902 | -0.780990183 | -0.13137 | 0.895485 | 0.942759 | Diphehmanil Methylsulfate                           |
| 6.478566 | -0.24865 | -0.007810076 | -0.781007629 | -0.16656 | 0.867714 | 0.928269 | ETODOLAC                                            |
| 6.502427 | -0.36996 | -0.00792467  | -0.792467028 | -0.1333  | 0.893958 | 0.941439 | FENIPENTOL                                          |
| 6.456366 | -0.21489 | -0.008097054 | -0.809705414 | -0.31115 | 0.755688 | 0.868527 | PIDOLIC ACID                                        |
| 6.503791 | -0.31093 | -0.008133403 | -0.813340332 | -0.31254 | 0.754626 | 0.867854 | CYCLANDELATE                                        |
| 6.485721 | -0.33429 | -0.008162667 | -0.816266741 | -0.18088 | 0.856459 | 0.922979 | Strontium ranelate                                  |
| 6.460898 | -0.27588 | -0.008194349 | -0.819434938 | -0.16424 | 0.820858 | 0.914953 | METOCLOPRAMIDE HYDROCHLORIDE                        |
| 6.465383 | -0.2219  | -0.0082504   | -0.825040005 | -0.17595 | 0.86033  | 0.924143 | FLUMQUINE                                           |
| 6.463893 | -0.22037 | -0.008327372 | -0.8327372   | -0.15752 | 0.874836 | 0.931996 | EDETATE DISODIUM                                    |
| 6.472756 | -0.30615 | -0.008360005 | -0.836004996 | -0.14062 | 0.88817  | 0.938194 | CEFSULODIN SODIUM                                   |
| 6.426511 | -0.20688 | -0.008366099 | -0.836609884 | -0.18539 | 0.852922 | 0.921884 | Flupentixol dihydrochloride                         |
| 6.475671 | -0.30736 | -0.008542816 | -0.854281646 | -0.66933 | 0.503287 | 0.685875 | PROMETHAZINE HYDROCHLORIDE                          |
| 6.456366 | -0.19948 | -0.008557008 | -0.85570078  | -0.18679 | 0.851823 | 0.921279 | Idasanutin (RG-7388)                                |
| 6.488551 | -0.26683 | -0.008663853 | -0.866385312 | -0.23748 | 0.812288 | 0.898909 | PIPERACETAZINE                                      |
| 6.494155 | -0.29141 | -0.008679743 | -0.867974264 | -0.33354 | 0.738727 | 0.856495 | OXYPHENONIUM BROMIDE                                |
| 6.485721 | -0.26129 | -0.00868269  | -0.868269018 | -0.23799 | 0.811888 | 0.89956  | DONEPEZIL HYDROCHLORIDE                             |
| 6.477121 | -0.31554 | -0.008722017 | -0.872201735 | -0.14671 | 0.883362 | 0.935375 | Retapamulin                                         |
| 6.501059 | -0.29563 | -0.008763864 | -0.876386394 | -0.16578 | 0.868334 | 0.928738 | ETHION                                              |
| 6.513218 | -0.39317 | -0.008868271 | -0.886827072 | -0.14917 | 0.88142  | 0.934526 | Clopidogrel Hydrogen Sulfate                        |
| 6.462398 | -0.21566 | -0.008872656 | -0.887265611 | -0.2432  | 0.807852 | 0.898044 | TIAPRIDE HYDROCHLORIDE                              |
| 6.495544 | -0.35543 | -0.008930864 | -0.893086396 | -0.19997 | 0.841506 | 0.914953 | Ataluren (PTC124)                                   |
| 6.468347 | -0.23915 | -0.00902852  | -0.902852014 | -0.34694 | 0.728635 | 0.850373 | D-PHENYALANINE                                      |
| 6.489858 | -0.27315 | -0.009161591 | -0.916159073 | -0       |          |          |                                                     |



|          |          |              |              |          |          |          |                                                     |
|----------|----------|--------------|--------------|----------|----------|----------|-----------------------------------------------------|
| 6.491362 | -0.28576 | -0.010215241 | -1.021524057 | -0.39254 | 0.694656 | 0.827125 | ETOSALAMIDE                                         |
| 6.50515  | -0.30391 | -0.010234422 | -1.023442213 | -0.19359 | 0.846495 | 0.917183 | FENOLDOPAM MESYLATE                                 |
| 6.477121 | -0.24715 | -0.010314009 | -1.031400867 | -0.1951  | 0.845317 | 0.916946 | SUCCIMER                                            |
| 6.515874 | -0.39888 | -0.010323266 | -1.032326624 | -0.17364 | 0.862146 | 0.924825 | Tetracycline                                        |
| 6.469822 | -0.23091 | -0.010344877 | -1.034487653 | -0.22062 | 0.825387 | 0.906776 | ACARBOSE                                            |
| 6.477121 | -0.24572 | -0.010444658 | -1.044465808 | -0.22275 | 0.82373  | 0.906169 | ENILCONAZOLE SULFATE                                |
| 6.510545 | -0.38771 | -0.010455995 | -1.045599541 | -0.23169 | 0.816776 | 0.902827 | Oxytetracycline HCl                                 |
| 6.499687 | -0.35435 | -0.010513895 | -1.051389511 | -0.18423 | 0.842351 | 0.915677 | ELETRIPATAN HYDROBROMIDE                            |
| 6.450249 | -0.19119 | -0.010542345 | -1.054234522 | -0.22483 | 0.822109 | 0.905436 | ZOMEPIRAC SODIUM                                    |
| 6.462398 | -0.21566 | -0.010572473 | -1.05724734  | -0.28979 | 0.771977 | 0.876702 | BUTICONAZOLE                                        |
| 6.456366 | -0.20386 | -0.010614268 | -1.061426823 | -0.29094 | 0.771101 | 0.876702 | ACYCLOVIR                                           |
| 6.510545 | -0.38771 | -0.010901074 | -1.090107425 | -0.24157 | 0.809117 | 0.898044 | (+)-Biuciclovir                                     |
| 6.503791 | -0.30116 | -0.010909058 | -1.090905777 | -0.20635 | 0.836515 | 0.912821 | HEXYLENE GLYCOL                                     |
| 6.510545 | -0.38742 | -0.010914703 | -1.091470307 | -0.18359 | 0.854334 | 0.922047 | Sodium Nitrite                                      |
| 6.477121 | -0.24447 | -0.011070894 | -1.107089407 | -0.30345 | 0.761546 | 0.871505 | CEFDITORIN PIVOXIL                                  |
| 6.507856 | -0.38192 | -0.011080899 | -1.108089879 | -0.24555 | 0.80603  | 0.897342 | Oxandrolone                                         |
| 6.481443 | -0.26567 | -0.011083173 | -1.108317322 | -0.4259  | 0.670183 | 0.814079 | PAZUFLOXACIN MESYLATE                               |
| 6.494155 | -0.35244 | -0.011131284 | -1.113128371 | -0.24667 | 0.805166 | 0.89677  | Aloe-emodin                                         |
| 6.466688 | -0.29349 | -0.011215112 | -1.121511187 | -0.18864 | 0.850372 | 0.920098 | SULFISOMIDINE                                       |
| 6.503791 | -0.30116 | -0.011230888 | -1.123087998 | -0.21244 | 0.831763 | 0.909769 | THIAMYLAL SODIUM                                    |
| 6.457882 | -0.26946 | -0.011242367 | -1.124236694 | -0.88083 | 0.378407 | 0.578687 | DEFERASIROX                                         |
| 6.465383 | -0.2219  | -0.011268911 | -1.126891098 | -0.24033 | 0.810076 | 0.898135 | TRIPROLDINE HYDROCHLORIDE                           |
| 6.474216 | -0.23982 | -0.011287647 | -1.128764703 | -0.24073 | 0.809765 | 0.898135 | ZIDOVUDINE [AZT]                                    |
| 6.474216 | -0.23879 | -0.011317584 | -1.131758404 | -0.31021 | 0.756399 | 0.888527 | VENLAFAXINE HYDROCHLORIDE                           |
| 6.472756 | -0.30615 | -0.011358187 | -1.135818696 | -0.19105 | 0.848486 | 0.918834 | PYRIDOSTIGMINE BROMIDE                              |
| 6.485721 | -0.33429 | -0.011450095 | -1.145009467 | -0.25373 | 0.799703 | 0.892401 | Swertiamarin                                        |
| 6.487138 | -0.26744 | -0.011472802 | -1.147280246 | -0.21702 | 0.828195 | 0.908254 | BUTYL PARABEN                                       |
| 6.507856 | -0.38164 | -0.011487473 | -1.148747294 | -0.19323 | 0.846782 | 0.917183 | Cilastatin-Na                                       |
| 6.509203 | -0.38482 | -0.011548727 | -1.154872724 | -0.25592 | 0.798015 | 0.89152  | Pikamilone                                          |
| 6.41162  | -0.17468 | -0.011572076 | -1.157207564 | -0.19465 | 0.845668 | 0.916946 | LORGLUMIDE SODIUM                                   |
| 6.448706 | -0.24991 | -0.011745489 | -1.174548875 | -0.92025 | 0.35744  | 0.557955 | CYCLOPHOSPHAMIDE                                    |
| 6.456366 | -0.2036  | -0.011816761 | -1.181676098 | -0.25201 | 0.801032 | 0.893136 | CARBIDOPA                                           |
| 6.487138 | -0.2772  | -0.011911815 | -1.191181543 | -0.45774 | 0.64714  | 0.797867 | MECYSTEINE HYDROCHLORIDE                            |
| 6.514548 | -0.33271 | -0.011938407 | -1.193840669 | -0.45876 | 0.646406 | 0.797358 | FLOPROPIONE                                         |
| 6.466688 | -0.2886  | -0.012276834 | -1.227683372 | -0.96188 | 0.336107 | 0.539458 | MEPENZOLATE BROMIDE                                 |
| 6.465383 | -0.2215  | -0.012371512 | -1.237151179 | -0.3391  | 0.734533 | 0.853913 | LEVOCETIRIZINE DIHYDROCHLORIDE                      |
| 6.457882 | -0.26946 | -0.012400956 | -1.240095611 | -0.33245 | 0.716134 | 0.83245  | FLUCLOMINE HYDROCHLORIDE                            |
| 6.421604 | -0.19615 | -0.012541223 | -1.254122303 | -0.10995 | 0.832626 | 0.910263 | MILRINONE                                           |
| 6.501059 | -0.30539 | -0.012550666 | -1.255066631 | -0.48229 | 0.629601 | 0.785467 | FASUDIL HYDROCHLORIDE                               |
| 6.502427 | -0.37024 | -0.012607224 | -1.260722407 | -0.27937 | 0.779958 | 0.879794 | Ecabet Sodium                                       |
| 6.480007 | -0.26276 | -0.012692727 | -1.269272715 | -0.48775 | 0.625729 | 0.781398 | CIPROFIBRATE                                        |
| 6.481443 | -0.25292 | -0.012720076 | -1.272007617 | -0.34866 | 0.727348 | 0.849516 | CEFTIBUTEN                                          |
| 6.506505 | -0.37873 | -0.012722267 | -1.272226746 | -0.214   | 0.83055  | 0.909414 | Pamidronate Disodium Pentahydrate (Pamidronic Acid) |
| 6.471292 | -0.23389 | -0.012812131 | -1.281213091 | -0.27324 | 0.784669 | 0.882968 | AMLEXANOX                                           |
| 6.488551 | -0.34038 | -0.012931873 | -1.293187296 | -0.28657 | 0.774443 | 0.876858 | Arbidol hydrochloride                               |
| 6.498311 | -0.29006 | -0.013089254 | -1.308925415 | -0.24759 | 0.804449 | 0.896185 | ESTRAMUSTINE                                        |
| 6.439333 | -0.1804  | -0.013166523 | -1.316652252 | -0.50595 | 0.612889 | 0.771574 | PIPEMIDIC ACID                                      |
| 6.465383 | -0.2215  | -0.013238638 | -1.323863819 | -0.36287 | 0.716703 | 0.841632 | ETHYLNOREPINEPHRINE HYDROCHLORIDE                   |
| 6.436163 | -0.15933 | -0.013352557 | -1.335255656 | -0.29148 | 0.770688 | 0.876702 | Cedranil (AZD2171)                                  |
| 6.445604 | -0.18177 | -0.013395747 | -1.339574665 | -0.28569 | 0.775118 | 0.877234 | RACEPHEDRINE HYDROCHLORIDE                          |
| 6.44248  | -0.24124 | -0.013429049 | -1.342904988 | -0.29758 | 0.76602  | 0.873987 | 10, 11-Dihydrocarbamazepine                         |
| 6.510545 | -0.3246  | -0.013432898 | -1.343289819 | -0.51619 | 0.605721 | 0.765758 | MILRINONE                                           |
| 6.454845 | -0.20205 | -0.013537839 | -1.353783869 | -0.25608 | 0.79789  | 0.89152  | LIOTHYRONINE (L- isomer) SODIUM                     |
| 6.471292 | -0.23306 | -0.013541919 | -1.354191909 | -0.37118 | 0.710502 | 0.836654 | SERTRALINE HYDROCHLORIDE                            |
| 6.471292 | -0.23306 | -0.013561328 | -1.356132766 | -0.37171 | 0.710106 | 0.836379 | ALENDRONATE SODIUM TRIHYDRATE                       |
| 6.465383 | -0.2219  | -0.013574295 | -1.357429477 | -0.28949 | 0.772203 | 0.876702 | ETHOSUXIMIDE                                        |
| 6.466688 | -0.23616 | -0.013672327 | -1.367232663 | -0.52539 | 0.599311 | 0.761597 | METICRANE                                           |
| 6.445604 | -0.1931  | -0.013711598 | -1.371159848 | -0.5269  | 0.598263 | 0.76102  | BROXALDINE                                          |
| 6.477121 | -0.24572 | -0.013748208 | -1.374820795 | -0.2932  | 0.769367 | 0.87653  | CHENODIL                                            |
| 6.4843   | -0.25851 | -0.013817162 | -1.381716152 | -0.37873 | 0.704891 | 0.833497 | CLARITHROMYCIN                                      |
| 6.4843   | -0.26169 | -0.013888208 | -1.388820825 | -0.26271 | 0.792777 | 0.888382 | ALISKIREN HEMIFUMARATE                              |
| 6.491362 | -0.34643 | -0.013954464 | -1.395446415 | -0.30923 | 0.757148 | 0.868803 | Tanshinone IIA-sulfonic sodium                      |
| 6.462398 | -0.21734 | -0.014057003 | -1.405700305 | -0.2659  | 0.790317 | 0.886208 | GEMFLOXACIN MESYLATE                                |
| 6.475671 | -0.24163 | -0.01407874  | -1.407874016 | -0.3859  | 0.699573 | 0.830277 | ROXITHROMYCIN                                       |
| 6.437751 | -0.16744 | -0.014086688 | -1.408668785 | -0.38611 | 0.699412 | 0.830277 | CHOLINE CHLORIDE                                    |
| 6.437751 | -0.16744 | -0.014101243 | -1.410124259 | -0.38651 | 0.699117 | 0.830277 | METHYSERGIDE MALEATE                                |
| 6.477121 | -0.24715 | -0.014168708 | -1.416870828 | -0.26801 | 0.788669 | 0.895159 | BROMINDIONE                                         |
| 6.515874 | -0.39888 | -0.014271057 | -1.427105664 | -0.24005 | 0.810294 | 0.898182 | ROFOXANIDE                                          |
| 6.501059 | -0.29563 | -0.014281396 | -1.428139645 | -0.27014 | 0.78705  | 0.884287 | LEVOSULPIRIDE                                       |
| 6.457882 | -0.2082  | -0.014393825 | -1.439382495 | -0.27227 | 0.785414 | 0.883419 | MITOTANE                                            |
| 6.40654  | -0.1639  | -0.014490932 | -1.449093172 | -0.32112 | 0.748123 | 0.862786 | Imperatorin                                         |
| 6.468347 | -0.22792 | -0.014582093 | -1.458209255 | -0.31099 | 0.75581  | 0.868527 | SELENOMETHIONINE                                    |
| 6.466688 | -0.22491 | -0.014718263 | -1.471826302 | -0.31389 | 0.753604 | 0.867043 | BENZOYL PEROXIDE                                    |
| 6.462398 | -0.27908 | -0.014849566 | -1.484956582 | -1.16346 | 0.244644 | 0.443076 | PIPERAZINE                                          |
| 6.462398 | -0.27908 | -0.01485235  | -1.48523496  | -1.16368 | 0.244556 | 0.443076 | HALAZONE                                            |
| 6.462398 | -0.21566 | -0.014879867 | -1.487986673 | -0.40786 | 0.68338  | 0.821663 | DIMPYLATE                                           |
| 6.495544 | -0.29423 | -0.014886319 | -1.488631861 | -0.57204 | 0.567294 | 0.738131 | TODRALAZINE HYDROCHLORIDE                           |
| 6.482874 | -0.2588  | -0.014908137 | -1.490813738 | -0.282   | 0.777945 | 0.879072 | GENTAMICIN SULFATE                                  |
| 6.477121 | -0.24447 | -0.015024025 | -1.502402532 | -0.41181 | 0.680481 | 0.820359 | MELOXICAM                                           |
| 6.471292 | -0.23306 | -0.015029338 | -1.502933829 | -0.41195 | 0.680375 | 0.820359 | QUINETHAZONE                                        |
| 6.460898 | -0.27589 | -0.015089635 | -1.508963511 | -1.18227 | 0.2371   | 0.434415 | LINCOCYMIN HYDROCHLORIDE                            |
| 6.485721 | -0.27434 | -0.015171859 | -1.517185936 | -0.58301 | 0.559884 | 0.731367 | PIROMIDIC ACID                                      |
| 6.471292 | -0.23306 | -0.015274341 | -1.527434128 | -0.41867 | 0.675459 | 0.817964 | ACETRIAZOIC ACID                                    |
| 6.485721 | -0.25781 | -0.015383496 | -1.538349578 | -0.33581 | 0.737015 | 0.855091 | Clevudine                                           |
| 6.453318 | -0.19895 | -0.015384497 | -1.538449675 | -0.29101 | 0.771044 | 0.876702 | TEMAZEPAM                                           |
| 6.474216 | -0.23495 | -0.015579832 | -1.557983242 | -0.3401  | 0.733785 | 0.853665 | Fludarabine                                         |
| 6.439333 | -0.17054 | -0.015584311 | -1.558431114 | -0.42716 | 0.66926  | 0.813922 | ESTROPIPATE                                         |
| 6.478566 | -0.25008 | -0.015680553 | -1.568055336 | -0.29661 | 0.766765 | 0.874546 | DILTIAZEM HYDROCHLORIDE                             |
| 6.501059 | -0.30539 | -0.015744611 | -1.574461094 | -0.60502 | 0.545164 | 0.720133 | CLOPERASTINE HYDROCHLORIDE                          |
| 6.462398 | -0.27908 | -0.015747283 | -1.574728286 | -1.23379 | 0.21728  | 0.412792 | COTININE                                            |
| 6.460898 | -0.20848 | -0.015793838 | -1.579383807 | -0.34477 | 0.73027  | 0.85151  | Fidaxomicin                                         |
| 6.457882 | -0.20668 | -0.015907958 | -1.590795765 | -0.33926 | 0.734411 | 0.853913 | MIZORIBINE                                          |
| 6.457882 | -0.26946 | -0.015959418 | -1.59594178  | -1.25041 | 0.211148 | 0.405455 | ERYTHROMYCIN ETHYLSUCCINATE                         |
| 6.463693 | -0.28227 | -0.015989899 | -1.598989891 | -1.25349 | 0.210027 | 0.403504 | ANTHYPRINE                                          |
| 6.511893 | -0.31755 | -0.01609318  | -1.609317989 | -0.3766  | 0.70647  | 0.834364 | Atenolol (BIW2992)                                  |
| 6.510545 | -0.39093 | -0.01609277  | -1.609277042 | -0.27069 | 0.831394 | 0.876936 | MEFENTERMININE SULFATE                              |
| 6.460898 | -0.20848 | -0.016220967 | -1.622096711 | -0.35409 | 0.723271 | 0.847402 | Tolterodine tartrate                                |
| 6.488551 | -0.2703  | -0.016249822 | -1.62498224  | -0.30738 | 0.758556 | 0.869639 | OCTISALATE                                          |
| 6.482874 | -0.25572 | -0.016254379 | -1.625437902 | -0.45293 | 0.650598 | 0.800022 | METAXALONE                                          |
| 6.514548 | -0.33271 | -0.016636172 | -1.663617235 | -0.63928 | 0.522638 | 0.701234 | CLEMIZOLE HYDROCHLORIDE                             |
| 6.510545 | -0.3246  | -0.016644934 | -1.664493357 | -0.63962 | 0.52242  | 0.701191 | BECLAMIDE                                           |
| 6.459392 | -0.27268 | -0.0166657   | -1.666570047 | -1.30575 | 0.191637 | 0.380156 | GEMFIBROZIL                                         |
| 6.480007 | -0.25011 | -0.016673077 | -1.667307741 | -0.45701 | 0.647666 | 0.798087 | HALCINONIDE                                         |
| 6.502427 | -0.30816 | -0.01682485  | -1.682485033 | -0.64653 | 0.517934 | 0.697297 | CITIOLONE                                           |
| 6.489958 | -0.34315 | -0.01689039  | -1.689039029 | -0.28411 | 0.776329 | 0.877828 | CHLOROACETOXYQUINOLINE                              |
| 6.506505 | -0.30666 | -0.017018412 | -1.701841205 | -0.32192 | 0.747516 | 0.862493 | NADOLOL                                             |
| 6.419956 | -0.12712 | -0.017084183 | -1.708418284 | -0.37293 | 0.709198 | 0.835757 | Felbamate                                           |
| 6.507856 | -0.38192 | -0.017186586 | -1.718658574 | -0.38085 | 0.703314 | 0.832209 | Scopolamin                                          |
| 6.399216 | -0.02629 | -0.017252179 | -1.725217898 | -0.3766  | 0.70647  | 0.834364 | Atenolol (BIW2992)                                  |
| 6.460898 | -0.20848 | -0.017504218 | -1.750421808 | -0.47977 | 0.631394 | 0.786936 | Mefentermine Sulfate                                |
| 6.472756 | -0.30639 | -0.017643748 | -1.764374775 | -0.39098 | 0.695811 | 0.828115 | Talc                                                |
| 6.495544 | -0.35543 |              |              |          |          |          |                                                     |

|          |          |              |              |          |          |          |                                   |
|----------|----------|--------------|--------------|----------|----------|----------|-----------------------------------|
| 6.485721 | -0.33429 | -0.019307401 | -1.930740112 | -0.42785 | 0.668762 | 0.813699 | Topiroxostat                      |
| 6.444045 | -0.24441 | -0.01937339  | -1.939733886 | -0.32627 | 0.744217 | 0.860328 | SENNOSIDE A                       |
| 6.463893 | -0.28227 | -0.01941282  | -1.94112824  | -1.52087 | 0.128293 | 0.290905 | CEFOTAXIME SODIUM                 |
| 6.50515  | -0.3761  | -0.01943638  | -1.943638021 | -0.43071 | 0.666682 | 0.812137 | Limorin                           |
| 6.487138 | -0.26407 | -0.019668475 | -1.966847545 | -0.53911 | 0.589811 | 0.754268 | AVOBENZONE                        |
| 6.474216 | -0.25104 | -0.019805978 | -1.980597799 | -0.76109 | 0.446603 | 0.637559 | PICONOL                           |
| 6.462874 | -0.25739 | -0.019853462 | -1.985346183 | -0.42405 | 0.571531 | 0.814842 | FENCLOXINE (+/-)                  |
| 6.510545 | -0.31489 | -0.019916028 | -1.993916028 | -0.37716 | 0.706052 | 0.634096 | PHENOLBARBITAL                    |
| 6.416641 | -0.18564 | -0.019978546 | -1.997854563 | -0.44272 | 0.657968 | 0.805739 | Chrysophanic Acid                 |
| 6.475671 | -0.31266 | -0.020014135 | -2.001413516 | -0.44351 | 0.657398 | 0.805739 | Flunisolide                       |
| 6.491362 | -0.27233 | -0.020080974 | -2.00809738  | -0.55042 | 0.582034 | 0.74906  | THONZONUM BROMIDE                 |
| 6.466868 | -0.2886  | -0.020189313 | -2.018931288 | -1.58182 | 0.11369  | 0.288836 | CARBACHOL                         |
| 6.471292 | -0.23389 | -0.020205672 | -2.020567201 | -0.43092 | 0.666527 | 0.812137 | RONIDAZOLE                        |
| 6.495544 | -0.35516 | -0.020328122 | -2.032812192 | -0.34193 | 0.732403 | 0.852679 | GLYCERYRHIZIN                     |
| 6.459392 | -0.20978 | -0.020370173 | -2.037017301 | -0.55834 | 0.57661  | 0.744951 | NIMODIPINE                        |
| 6.445604 | -0.24796 | -0.020383213 | -2.038321347 | -0.45169 | 0.651494 | 0.800684 | Arbutin                           |
| 6.472756 | -0.23686 | -0.020471366 | -2.047136625 | -0.43659 | 0.662412 | 0.80886  | CAPSAICIN                         |
| 6.474216 | -0.30426 | -0.020530301 | -2.053030092 | -1.60854 | 0.107717 | 0.257442 | ETHACRYNIC ACID                   |
| 6.491362 | -0.27233 | -0.020637737 | -2.063773739 | -0.56568 | 0.571613 | 0.741677 | CANRENONE                         |
| 6.487138 | -0.26605 | -0.020643155 | -2.064315464 | -0.44025 | 0.659756 | 0.806908 | FLUTAMIDE                         |
| 6.503791 | -0.37317 | -0.020654038 | -2.065403814 | -0.45769 | 0.647176 | 0.797867 | Leucovorin Calcium Pentahydrate   |
| 6.515874 | -0.33539 | -0.020698829 | -2.06982859  | -0.7954  | 0.426381 | 0.619662 | SECNIDAZOLE                       |
| 6.450249 | -0.25319 | -0.020930096 | -2.09300993  | -0.63203 | 0.102673 | 0.249382 | OXYMETAZOLINE HYDROCHLORIDE       |
| 6.448706 | -0.24991 | -0.020936954 | -2.093695358 | -1.8404  | 0.100922 | 0.246762 | DEHYDROCHOLATE SODIUM             |
| 6.472756 | -0.23686 | -0.021102713 | -2.110272956 | -0.45005 | 0.652674 | 0.801749 | ADAPALENE                         |
| 6.454845 | -0.19645 | -0.021136467 | -2.113646671 | -0.46139 | 0.644517 | 0.796315 | Apatinib                          |
| 6.468347 | -0.29176 | -0.02122361  | -2.122361013 | -1.66286 | 0.09634  | 0.238868 | PRAZICQUANTEL                     |
| 6.501059 | -0.30539 | -0.021450638 | -2.145063759 | -0.82429 | 0.409774 | 0.60559  | DROFENINE HYDROCHLORIDE           |
| 6.499687 | -0.29285 | -0.021500753 | -2.150075265 | -0.4067  | 0.684226 | 0.821796 | MALATHION                         |
| 6.453318 | -0.25973 | -0.021528285 | -2.152828544 | -1.68673 | 0.091655 | 0.230941 | DIBUCAINE HYDROCHLORIDE           |
| 6.4843   | -0.33098 | -0.021718053 | -2.171805266 | -0.36531 | 0.71488  | 0.840263 | PIRIBEDIL HYDROCHLORIDE           |
| 6.466868 | -0.2886  | -0.02171964  | -2.171963982 | -1.70172 | 0.088807 | 0.225653 | NOVOBIOCIN SODIUM                 |
| 6.495544 | -0.35543 | -0.021723665 | -2.172366465 | -0.48139 | 0.630238 | 0.785908 | Etofibrate                        |
| 6.469822 | -0.23091 | -0.021741014 | -2.174101389 | -0.46366 | 0.642889 | 0.795301 | RESORCINOL                        |
| 6.503791 | -0.29372 | -0.021798895 | -2.179889497 | -0.47585 | 0.63418  | 0.788634 | Brexipiprazole                    |
| 6.462874 | -0.25739 | -0.021819201 | -2.181920142 | -0.46533 | 0.641695 | 0.794555 | CEFMETAZOLE SODIUM                |
| 6.472756 | -0.23832 | -0.02186529  | -2.186529192 | -0.4136  | 0.679169 | 0.820359 | DESCOX/METASONE                   |
| 6.488551 | -0.26793 | -0.022175273 | -2.175273073 | -0.67092 | 0.543307 | 0.718496 | MIQUIMOD HYDROCHLORIDE            |
| 6.517196 | -0.40172 | -0.022277602 | -2.227760194 | -0.37472 | 0.707868 | 0.835088 | IPIROHEPTINE HYDROCHLORIDE        |
| 6.469822 | -0.23091 | -0.022329954 | -2.232995444 | -0.47622 | 0.633915 | 0.788634 | alpha-TOCOPHERYL ACETATE [4mM]    |
| 6.513218 | -0.33002 | -0.022331357 | -2.233135734 | -0.85813 | 0.390818 | 0.587882 | AMINOTHIAZOLE                     |
| 6.485721 | -0.26129 | -0.022393501 | -2.239350066 | -0.6138  | 0.539346 | 0.714291 | TRIFLURIDINE                      |
| 6.522444 | -0.3487  | -0.022657821 | -2.265782077 | -0.87068 | 0.383929 | 0.582262 | PRINIDOL METHANESULFONATE         |
| 6.466868 | -0.2886  | -0.022720576 | -2.272057624 | -1.78015 | 0.075052 | 0.200451 | MECLIZINE HYDROCHLORIDE           |
| 6.418301 | -0.18921 | -0.022754931 | -2.275493135 | -0.50424 | 0.61409  | 0.77264  | 5-Acetylsalicylic acid            |
| 6.468347 | -0.29176 | -0.022796306 | -2.279630574 | -1.78608 | 0.074086 | 0.198493 | COLISTIMETHATE SODIUM             |
| 6.526339 | -0.35659 | -0.022872344 | -2.287234384 | -0.87892 | 0.379443 | 0.57924  | AMBROXOL HYDROCHLORIDE            |
| 6.515874 | -0.39888 | -0.022913913 | -2.291391282 | -0.38542 | 0.699923 | 0.830499 | Terazosin-HCl                     |
| 6.50515  | -0.30391 | -0.022950887 | -2.295088664 | -0.43413 | 0.664192 | 0.810646 | MOLINDONE HYDROCHLORIDE           |
| 6.481443 | -0.25449 | -0.022955399 | -2.295539893 | -0.48956 | 0.624444 | 0.780364 | DEHYDROCHOLIC ACID                |
| 6.491362 | -0.27233 | -0.022970937 | -2.297093679 | -0.62963 | 0.528937 | 0.706528 | RIFAXIMIN                         |
| 6.501059 | -0.36702 | -0.022984853 | -2.298485269 | -0.38679 | 0.598915 | 0.830265 | Rivastudin Trifluoroacetate       |
| 6.485721 | -0.26317 | -0.023007709 | -2.3007709   | -0.49068 | 0.623655 | 0.78033  | ROXATIDINE ACETATE HYDROCHLORIDE  |
| 6.50515  | -0.37582 | -0.023148823 | -2.314882316 | -0.38938 | 0.696998 | 0.828702 | Sodium ascorbate                  |
| 6.487138 | -0.26407 | -0.023205314 | -2.320531426 | -0.63605 | 0.524741 | 0.702804 | AMINOLEVULINIC ACID HYDROCHLORIDE |
| 6.489958 | -0.27315 | -0.023246284 | -2.324628395 | -0.43972 | 0.660139 | 0.806908 | TICARCILLIN DISODIUM              |
| 6.480007 | -0.25011 | -0.023251062 | -2.325106164 | -0.63731 | 0.523924 | 0.702223 | MORANTEL CITRATE                  |
| 6.488551 | -0.26891 | -0.023393896 | -2.339389646 | -0.49891 | 0.61784  | 0.775441 | THEOPHYLLINE                      |
| 6.444045 | -0.18018 | -0.023406151 | -2.340615117 | -0.44275 | 0.65795  | 0.805739 | VORTIOXETINE HYDROBROMIDE         |
| 6.475671 | -0.24278 | -0.023629644 | -2.362964448 | -0.50394 | 0.614303 | 0.77264  | PALIPERIDONE                      |
| 6.499687 | -0.36434 | -0.023648298 | -2.364829767 | -0.52404 | 0.60025  | 0.762086 | Torezolid                         |
| 6.459392 | -0.20978 | -0.023749667 | -2.37496675  | -0.65098 | 0.515063 | 0.694817 | FLUXURIDINE                       |
| 6.523746 | -0.35134 | -0.023760455 | -2.376045454 | -0.91305 | 0.361216 | 0.562564 | CHLORINDIONE                      |
| 6.475671 | -0.25398 | -0.023760457 | -2.376045723 | -0.91305 | 0.361216 | 0.562564 | CHLOROBUTANOL                     |
| 6.487138 | -0.2772  | -0.02377952  | -2.377952029 | -0.91378 | 0.360831 | 0.562391 | DOCCANOL                          |
| 6.480007 | -0.25011 | -0.023859782 | -2.385978211 | -0.65427 | 0.51294  | 0.633491 | TRIMIPRAMINE MALEATE              |
| 6.491362 | -0.27433 | -0.023990084 | -2.399008427 | -0.54636 | 0.510618 | 0.682085 | PHYSOTIGMINE SALICYLATE           |
| 6.469822 | -0.35814 | -0.024020057 | -2.402005745 | -0.40403 | 0.686819 | 0.827779 | 4-NAPHTHALIMIDOBUTYRIC ACID       |
| 6.424882 | -0.20337 | -0.024072172 | -2.407217204 | -0.53343 | 0.593733 | 0.75695  | Aristolochic acid                 |
| 6.460898 | -0.27588 | -0.024082816 | -2.408281633 | -1.88688 | 0.059177 | 0.169011 | METRONIDAZOLE                     |
| 6.489958 | -0.26958 | -0.024111575 | -2.411157522 | -0.66089 | 0.50868  | 0.690284 | SEVOFLURANE                       |
| 6.474216 | -0.30929 | -0.024303265 | -2.430326486 | -0.40879 | 0.682691 | 0.821547 | EQUILIN                           |
| 6.474216 | -0.23982 | -0.024348504 | -2.434850533 | -0.51927 | 0.603571 | 0.764596 | ADENOSINE 5-MONOPHOSPHATE         |
| 6.491362 | -0.27233 | -0.024379269 | -2.437926869 | -0.66823 | 0.503985 | 0.686603 | CEFPROZIL                         |
| 6.477121 | -0.24572 | -0.024415945 | -2.441594502 | -0.52071 | 0.602568 | 0.763651 | SPECTINOMYCIN HYDROCHLORIDE       |
| 6.418301 | -0.12383 | -0.024416358 | -2.441635757 | -0.53299 | 0.594041 | 0.756966 | Axitinib                          |
| 6.514548 | -0.39603 | -0.024486662 | -2.448666223 | -0.41188 | 0.680428 | 0.820359 | ACETOHexamide                     |
| 6.495544 | -0.28446 | -0.02449827  | -2.449827004 | -0.4634  | 0.643075 | 0.795301 | METHYLATROPINE NITRATE            |
| 6.510545 | -0.38742 | -0.024498393 | -2.449839258 | -0.41208 | 0.680283 | 0.820359 | CURCUMIN                          |
| 6.477121 | -0.31045 | -0.02453435  | -2.453434974 | -1.92226 | 0.054574 | 0.159575 | CHLORPROPAMIDE                    |
| 6.518514 | -0.40486 | -0.024655394 | -2.46553938  | -0.54636 | 0.584982 | 0.751198 | Tetrahydrozoline hydrochloride    |
| 6.460898 | -0.27588 | -0.024667624 | -2.466762431 | -1.9327  | 0.053273 | 0.15721  | PHENYL AMINOSALICYLATE            |
| 6.4843   | -0.26169 | -0.024768695 | -2.476869508 | -0.46852 | 0.639414 | 0.792495 | TROMETHAMINE                      |
| 6.514548 | -0.32294 | -0.024825848 | -2.482584834 | -0.4696  | 0.638641 | 0.792113 | VIOXYCIN SULFATE                  |
| 6.472756 | -0.23686 | -0.024851934 | -2.485193419 | -0.53001 | 0.596106 | 0.759031 | NALIDIXIC ACID                    |
| 6.445604 | -0.17809 | -0.024979651 | -2.49796507  | -0.54529 | 0.585557 | 0.751957 | Mebutrinib (TAK 165)              |
| 6.495544 | -0.29423 | -0.024990245 | -2.499024501 | -0.96031 | 0.3369   | 0.54015  | TENATOPRAZOLE                     |
| 6.485721 | -0.27434 | -0.024995269 | -2.49952692  | -0.9605  | 0.336803 | 0.54015  | BERGAPTEN                         |
| 6.488551 | -0.26891 | -0.025050983 | -2.505098276 | -0.53425 | 0.593166 | 0.756793 | PIPERINE                          |
| 6.468347 | -0.29176 | -0.025207454 | -2.520745405 | -1.97499 | 0.048269 | 0.147018 | PIROXICAM                         |
| 6.474216 | -0.23982 | -0.025275293 | -2.527529266 | -0.53904 | 0.589861 | 0.754268 | MECLOCYCLINE SULFOSALICYLATE      |
| 6.511883 | -0.3903  | -0.025330043 | -2.533004253 | -0.42607 | 0.67006  | 0.814079 | Impipenem                         |
| 6.487138 | -0.33734 | -0.025353036 | -2.53530359  | -0.56182 | 0.57424  | 0.743767 | Hydroferulic acid                 |
| 6.495544 | -0.28051 | -0.025363661 | -2.536366061 | -0.69521 | 0.486921 | 0.671434 | CYCLOTHIAZIDE                     |
| 6.434569 | -0.22422 | -0.025382499 | -2.538249928 | -0.56247 | 0.573795 | 0.743379 | (-)-Huperzine A (HupA)            |
| 6.521138 | -0.4106  | -0.025419329 | -2.54193278  | -0.56317 | 0.573329 | 0.742954 | Cefmoxon Sodium                   |
| 6.503791 | -0.31093 | -0.025432977 | -2.543297738 | -0.97732 | 0.32841  | 0.533848 | AMINOPYRINE                       |
| 6.481443 | -0.25449 | -0.025434494 | -2.543449448 | -0.54243 | 0.58752  | 0.753156 | ANTAZOLINE                        |
| 6.463893 | -0.28227 | -0.025441015 | -2.544101531 | -1.99329 | 0.046229 | 0.142673 | PENICILLIN G POTASSIUM            |
| 6.468347 | -0.29667 | -0.025470313 | -2.547031308 | -0.42842 | 0.668342 | 0.813699 | Trientine Dihydrochloride         |
| 6.485721 | -0.26317 | -0.025548221 | -2.554822142 | -0.54486 | 0.585851 | 0.752146 | AMOROLFINE HYDROCHLORIDE          |
| 6.507826 | -0.31916 | -0.025588056 | -2.558805555 | -0.98328 | 0.325469 | 0.531906 | METHYL PARATHIONE                 |
| 6.495544 | -0.35516 | -0.025656459 | -2.56564594  | -0.43156 | 0.666064 | 0.811964 | Allitretinoin                     |
| 6.523746 | -0.41581 | -0.025717814 | -2.571781357 | -0.43259 | 0.665314 | 0.811629 | LYNESTRENOL                       |
| 6.521138 | -0.34605 | -0.0261382   | -2.613819968 | -1.00442 | 0.315176 | 0.521389 | ACTARIT                           |
| 6.501059 | -0.29663 | -0.026209935 | -2.6209935   | -0.49578 | 0.620049 | 0.777148 | DIFLORASONE DIACETATE             |
| 6.4843   | -0.26169 | -0.026355538 | -2.635553809 | -0.49853 | 0.618107 | 0.775441 | OCTOCRYLENE                       |
| 6.52763  | -0.3592  | -0.02659193  | -2.659193028 | -1.02186 | 0.306849 | 0.511082 | CINCHOPRYN                        |
| 6.474216 | -0.24127 | -0.026636574 | -2.663657401 | -0.50389 | 0.61434  | 0.77264  | HALOTHANE                         |
| 6.501059 | -0.3673  | -0.026651093 | -2.6651093   | -0.59089 | 0.554592 | 0.727148 | Indinavir                         |
| 6.515874 | -0.39888 | -0.026712731 | -2.671273086 | -0.44932 | 0.653199 | 0.802009 | 4-Aminosalicylic Acid             |
| 6.518514 | -0.40486 | -0.0268138   |              |          |          |          |                                   |

|            |          |              |              |          |          |          |                                        |
|------------|----------|--------------|--------------|----------|----------|----------|----------------------------------------|
| 6.471292   | -0.23306 | -0.027854663 | -2.78546634  | -0.76349 | 0.44517  | 0.63649  | THIOSTREPTON                           |
| 6.480007   | -0.25157 | -0.027894992 | -2.789499156 | -0.59491 | 0.551906 | 0.725669 | AZATADINE MALEATE                      |
| 6.511883   | -0.3903  | -0.02804386  | -2.804386009 | -0.47171 | 0.637131 | 0.790815 | MOLSIDOMINE                            |
| 6.511883   | -0.31755 | -0.028051404 | -2.805140366 | -0.53061 | 0.595687 | 0.758685 | NITHIAMIDE                             |
| 6.469822   | -0.2949  | -0.028076202 | -2.807620235 | -2.19976 | 0.027824 | 0.095997 | ACETAMINOPHEN                          |
| 6.450249   | -0.25775 | -0.028076943 | -2.807694283 | -0.47227 | 0.636734 | 0.790514 | GHRP-2                                 |
| 6.494155   | -0.27779 | -0.028125559 | -2.81255593  | -0.77092 | 0.440756 | 0.633362 | NAL TREXONE HYDROCHLORIDE              |
| 6.4582874  | -0.2888  | -0.028179296 | -2.82179296  | -0.57676 | 0.593505 | 0.735948 | DEFUOZACORT                            |
| 6.513218   | -0.39317 | -0.028267365 | -2.826736483 | -0.47547 | 0.63445  | 0.788634 | PROTAMINE SULFATE [10mg/ml]            |
| 6.507856   | -0.31916 | -0.028298593 | -2.829859272 | -1.08744 | 0.276843 | 0.480324 | DIACETAMATE                            |
| 6.469822   | -0.2949  | -0.028356377 | -2.835637711 | -2.22171 | 0.026303 | 0.0918   | HYDROFLUMETHIAZIDE                     |
| 6.522444   | -0.3487  | -0.028395083 | -2.839508325 | -1.09115 | 0.275208 | 0.478136 | EPALRESTAT                             |
| 6.4843     | -0.25499 | -0.028429463 | -2.842946315 | -0.62059 | 0.534868 | 0.710567 | Decitabine                             |
| 6.518514   | -0.34074 | -0.028504804 | -2.850480442 | -1.09536 | 0.273357 | 0.476051 | NEVIRAPINE                             |
| 6.494155   | -0.35244 | -0.028576124 | -2.857612424 | -0.63324 | 0.526576 | 0.704487 | O-Acetyl-L-carnitine hydrochloride     |
| 6.489958   | -0.26958 | -0.02859131  | -2.859131042 | -0.78368 | 0.433226 | 0.625702 | MIDODRINE HYDROCHLORIDE                |
| 6.49276    | -0.27507 | -0.028595358 | -2.859535814 | -0.78379 | 0.433161 | 0.625702 | PIGOLITAZONE HYDROCHLORIDE             |
| 6.521138   | -0.34605 | -0.028645362 | -2.864536246 | -1.10076 | 0.270999 | 0.473404 | HEPTAMINOL HYDROCHLORIDE               |
| 6.468347   | -0.29667 | -0.02870678  | -2.870677985 | -0.48286 | 0.629192 | 0.785149 | Indacaterol Maleate                    |
| 6.521138   | -0.4105  | -0.028804285 | -2.880428455 | -0.6383  | 0.52328  | 0.701544 | Lycopene                               |
| 6.471721   | -0.25692 | -0.028819088 | -2.881908782 | -1.10744 | 0.268104 | 0.469857 | ADIPIIC ACID                           |
| 6.514548   | -0.3151  | -0.028834313 | -2.883431297 | -0.62943 | 0.529068 | 0.706528 | Rimnabant                              |
| 6.485721   | -0.33404 | -0.028933538 | -2.89335375  | -0.48701 | 0.626248 | 0.781665 | HEPTACHLOR                             |
| 6.471292   | -0.29803 | -0.028983927 | -2.898392736 | -2.27088 | 0.023154 | 0.083018 | DIETHYLSILBESTROL                      |
| 6.480007   | -0.25011 | -0.029087504 | -2.908750445 | -0.79728 | 0.425286 | 0.618522 | DROSPIRENONE                           |
| 6.471292   | -0.303   | -0.029107247 | -2.910724668 | -0.4896  | 0.624417 | 0.780364 | Apremilast (CC-10004)                  |
| 6.50515    | -0.30391 | -0.029129444 | -2.912944402 | -0.55101 | 0.58163  | 0.74898  | ADENOSINE TRIPHOSPHATE DISODIUM        |
| 6.498311   | -0.29006 | -0.029228623 | -2.922862265 | -0.55288 | 0.580345 | 0.748266 | PIMAGEDINE HYDROCHLORIDE               |
| 6.510545   | -0.30714 | -0.02924154  | -2.924154036 | -0.63832 | 0.523266 | 0.701544 | Rufinamide                             |
| 6.480007   | -0.25011 | -0.029247884 | -2.924788364 | -0.80168 | 0.422738 | 0.616643 | PRILOCAINE HYDROCHLORIDE               |
| 6.4843     | -0.25851 | -0.029279411 | -2.927941078 | -0.80254 | 0.422238 | 0.61609  | CARBARSONE                             |
| 6.518514   | -0.40456 | -0.029318839 | -2.931883879 | -0.49316 | 0.6219   | 0.778706 | Tramadol HCl                           |
| 6.485721   | -0.33404 | -0.029593711 | -2.959371135 | -0.49778 | 0.618637 | 0.775569 | Olopatadine                            |
| 6.466868   | -0.22639 | -0.029649467 | -2.964946666 | -0.56084 | 0.574905 | 0.744251 | LOBENDAZOLE                            |
| 6.462398   | -0.27908 | -0.029780917 | -2.978091659 | -2.33332 | 0.019631 | 0.073494 | DAPSONE                                |
| 6.498311   | -0.28592 | -0.029868107 | -2.986810703 | -0.81868 | 0.412969 | 0.60811  | CHLORMADINONE ACETATE                  |
| 6.465366   | -0.20266 | -0.029868021 | -2.986802108 | -0.63954 | 0.529469 | 0.701191 | NICARDIPINE HYDROCHLORIDE              |
| 6.506505   | -0.30696 | -0.030080225 | -3.008022522 | -0.68762 | 0.57028  | 0.693338 | MIRTAZAPINE                            |
| 6.482874   | -0.32791 | -0.030156088 | -3.015608782 | -0.50724 | 0.611985 | 0.771005 | CANIDANOL [+catechin]                  |
| 6.471292   | -0.29803 | -0.030159691 | -3.015969069 | -2.363   | 0.018128 | 0.068904 | INOSITOL                               |
| 6.519828   | -0.3434  | -0.030235203 | -3.02352034  | -1.16186 | 0.245293 | 0.443937 | LEVOCARNITINE PROPIONATE HYDROCHLORIDE |
| 6.465383   | -0.2174  | -0.030541901 | -3.054190061 | -0.6667  | 0.504961 | 0.687409 | Vatalanib (PTK787) 2HCl                |
| 6.4843     | -0.26029 | -0.030553809 | -3.055380903 | -0.65161 | 0.514652 | 0.694706 | RANITIDINE HYDROCHLORIDE               |
| 6.510545   | -0.31484 | -0.030795294 | -3.079529373 | -0.58252 | 0.560219 | 0.731528 | ANAGRELIDE HYDROCHLORIDE               |
| 6.469822   | -0.23019 | -0.030844955 | -3.084495538 | -0.84546 | 0.397856 | 0.594503 | EZETIMIBE                              |
| 6.463893   | -0.28227 | -0.030856128 | -3.08561284  | -2.41756 | 0.015625 | 0.061585 | CARISOPRODOL                           |
| 6.519828   | -0.40768 | -0.030907119 | -3.090711866 | -0.6849  | 0.49341  | 0.676194 | Pentostatin                            |
| 6.494155   | -0.35244 | -0.030942353 | -3.094235336 | -0.68568 | 0.492917 | 0.675748 | Adrenosterone                          |
| 6.509203   | -0.30448 | -0.030947103 | -3.094710269 | -0.67555 | 0.499326 | 0.681383 | Marimastat(BB-2516)                    |
| 6.472756   | -0.23686 | -0.031047251 | -3.104725083 | -0.66213 | 0.507885 | 0.69012  | SULFAMETHAZINE                         |
| 6.468347   | -0.29176 | -0.031076544 | -3.107654417 | -2.43483 | 0.014899 | 0.059455 | ROBENIDINE HYDROCHLORIDE               |
| 6.463893   | -0.28709 | -0.031096653 | -3.10966276  | -0.52296 | 0.601001 | 0.762419 | OZAGREL HYDROCHLORIDE                  |
| 6.480007   | -0.24646 | -0.031123447 | -3.112344655 | -0.6794  | 0.496885 | 0.679501 | Nandrolone decanoate                   |
| 6.5302     | -0.3644  | -0.031149229 | -3.114922875 | -1.19698 | 0.231314 | 0.427973 | VINCAMINE                              |
| 6.513218   | -0.32025 | -0.031333528 | -3.133352783 | -0.5927  | 0.553384 | 0.726188 | DIETHYLTOLAMIDE                        |
| 6.513218   | -0.39346 | -0.031350179 | -3.135017943 | -0.69471 | 0.487235 | 0.671686 | Simenomen hydrochloride                |
| 6.481443   | -0.25292 | -0.031440035 | -3.14400351  | -0.86177 | 0.388816 | 0.586373 | CEFUROXIME AXETIL                      |
| 6.440405   | -0.18994 | -0.031450234 | -3.145023395 | -1.20855 | 0.226836 | 0.42356  | KHELLIN                                |
| 6.517196   | -0.40202 | -0.031465203 | -3.146520337 | -0.69726 | 0.485639 | 0.671112 | Bifedatatum                            |
| 6.471292   | -0.30324 | -0.031629665 | -3.162965487 | -0.7009  | 0.483363 | 0.668689 | Ebumalartido                           |
| 6.510545   | -0.38771 | -0.031631236 | -3.163123641 | -0.70094 | 0.48334  | 0.668689 | Verteporfin                            |
| 6.507856   | -0.3018  | -0.031645291 | -3.164529147 | -0.69079 | 0.489697 | 0.673629 | Nelfinavir Mesylate                    |
| 6.499687   | -0.28862 | -0.031768737 | -3.176873686 | -0.87078 | 0.383876 | 0.582262 | RANOLAZINE DIHYDROCHLORIDE             |
| 6.454845   | -0.26299 | -0.03183979  | -3.18397896  | -2.49463 | 0.012609 | 0.05202  | NIACIN                                 |
| 6.471292   | -0.29803 | -0.032034802 | -3.203480183 | -2.50991 | 0.012076 | 0.050186 | FIUROSEMIDE                            |
| 6.4843     | -0.33098 | -0.032057354 | -3.205735428 | -0.53922 | 0.589733 | 0.754268 | AZINPHOS METHYL                        |
| 6.506505   | -0.37901 | -0.032164206 | -3.216420649 | -0.71275 | 0.475986 | 0.66226  | Arnettole trithione                    |
| 6.513218   | -0.39317 | -0.032179164 | -3.217916399 | -0.54127 | 0.588321 | 0.753427 | TERAZOSIN HYDROCHLORIDE                |
| 6.49276    | -0.27745 | -0.032243087 | -3.224308703 | -0.68764 | 0.491681 | 0.674908 | KETOPROFEN                             |
| 6.506505   | -0.37901 | -0.032251314 | -3.225131411 | -0.71468 | 0.474805 | 0.661091 | Tipiracil hydrochloride                |
| 6.487138   | -0.26744 | -0.032265905 | -3.226590539 | -0.61033 | 0.541641 | 0.716589 | TOLTRAZURIL                            |
| 6.496987   | -0.36434 | -0.03232903  | -3.232902955 | -0.7164  | 0.473742 | 0.660582 | 2-Aminobenzenesulfonamide              |
| 6.491362   | -0.27461 | -0.032333659 | -3.233365908 | -0.68957 | 0.490465 | 0.673962 | TOLMETIN SODIUM                        |
| 6.502427   | -0.29101 | -0.032373943 | -3.237394344 | -0.7067  | 0.479755 | 0.664892 | Galeterone                             |
| 6.457882   | -0.20249 | -0.03247034  | -3.247034042 | -0.7088  | 0.478448 | 0.664043 | Nafamostat Mesylate                    |
| 6.462398   | -0.27908 | -0.032491236 | -3.249123608 | -2.54568 | 0.010907 | 0.046574 | OXIDOPAMINE HYDROCHLORIDE              |
| 6.481443   | -0.25449 | -0.032548525 | -3.254852455 | -0.69415 | 0.487587 | 0.67181  | MEMANTINE HYDROCHLORIDE                |
| 6.460898   | -0.27588 | -0.032549342 | -3.254934174 | -2.55023 | 0.010765 | 0.046124 | HYDROXYZINE PAMOATE                    |
| 6.510545   | -0.38742 | -0.032555146 | -3.255514582 | -0.5476  | 0.58397  | 0.750733 | Cabergoline                            |
| 6.478966   | -0.24865 | -0.032606439 | -3.260643851 | -0.69539 | 0.486813 | 0.671434 | IOHEXOL                                |
| 6.450249   | -0.25796 | -0.032621386 | -3.262138638 | -0.72288 | 0.469752 | 0.655885 | Tetrandrine                            |
| 6.514548   | -0.33271 | -0.032731945 | -3.27319453  | -1.2578  | 0.208464 | 0.401404 | CYPROTHERONE                           |
| 6.487138   | -0.33708 | -0.032736996 | -3.273699606 | -0.55065 | 0.581871 | 0.74906  | EFLORNITHINE HYDROCHLORIDE HYDRATE     |
| 6.462398   | -0.21584 | -0.032900577 | -3.290057703 | -0.70166 | 0.482892 | 0.668398 | INDOPROFEN                             |
| 6.511883   | -0.39059 | -0.033006278 | -3.300627811 | -0.73141 | 0.464527 | 0.650898 | Scopolamine N-oxide HBr                |
| 6.431364   | -0.14979 | -0.033150249 | -3.315024904 | -0.72364 | 0.469285 | 0.655627 | Bosutinib (SKI-606)                    |
| 6.506505   | -0.30666 | -0.033165723 | -3.316572257 | -0.62735 | 0.530427 | 0.707604 | PRALIDOXIME CHLORIDE                   |
| 6.474216   | -0.23982 | -0.033192471 | -3.319247105 | -0.70788 | 0.479017 | 0.664505 | MEPHENESIN                             |
| 6.501059   | -0.36702 | -0.033255073 | -3.325507279 | -0.55937 | 0.57591  | 0.744775 | PHYSOSTIGMINE                          |
| 6.474216   | -0.30426 | -0.033407877 | -3.340787662 | -2.61749 | 0.008858 | 0.039063 | KITASAMYCINS [A1 shown]                |
| 6.50515    | -0.3761  | -0.033613939 | -3.361393933 | -0.74488 | 0.456346 | 0.643423 | Ramatroban                             |
| 6.465383   | -0.2174  | -0.033625497 | -3.362549707 | -0.73402 | 0.462938 | 0.649204 | Rioiguat (BAY 63-2521)                 |
| 6.519828   | -0.40768 | -0.033643083 | -3.364308286 | -0.74552 | 0.455955 | 0.643421 | Lappaconitine                          |
| 6.498311   | -0.29006 | -0.033654944 | -3.36549434  | -0.6366  | 0.524384 | 0.702655 | CITICOLINE                             |
| 6.514548   | -0.39632 | -0.033657352 | -3.365735388 | -0.74591 | 0.454722 | 0.643421 | Sodium Demethylcantharidate            |
| 6.523746   | -0.41612 | -0.033665056 | -3.366505609 | -0.74801 | 0.455661 | 0.643421 | Methyl Aminocyclitol-HCl               |
| 6.50515    | -0.29642 | -0.033714005 | -3.371400497 | -0.73595 | 0.461762 | 0.648086 | Imidapril HCl                          |
| 6.471292   | -0.29803 | -0.033749259 | -3.374925878 | -2.64424 | 0.008187 | 0.036452 | SEMUSTINE                              |
| 6.474216   | -0.24127 | -0.033857284 | -3.3857284   | -0.64044 | 0.521889 | 0.700779 | TILORONE                               |
| 6.472756   | -0.30115 | -0.033945196 | -3.394519591 | -2.65959 | 0.007824 | 0.035137 | NAPHAZOLINE HYDROCHLORIDE              |
| 6.503791   | -0.31093 | -0.033957345 | -3.395734502 | -1.30489 | 0.19193  | 0.380443 | ALLYLTHIOUREA                          |
| 6.519828   | -0.33363 | -0.033988019 | -3.398801899 | -0.64291 | 0.520283 | 0.699724 | HYDRALAZINE HYDROCHLORIDE              |
| 6.485721   | -0.33429 | -0.034046988 | -3.404698795 | -0.75447 | 0.450565 | 0.639737 | Ibudilast                              |
| 6.454845   | -0.26299 | -0.034047188 | -3.404718776 | -2.66758 | 0.00764  | 0.034586 | NORFLOXACIN                            |
| 6.481443   | -0.24931 | -0.034156695 | -3.415669532 | -0.74561 | 0.455901 | 0.643421 | TSU-68 (SU6668, Orantinib)             |
| 6.487138   | -0.33708 | -0.034189172 | -3.418917181 | -0.57508 | 0.565237 | 0.736016 | Bemegride                              |
| 6.525045   | -0.41891 | -0.034290128 | -3.429012849 | -0.75986 | 0.447337 | 0.638119 | Mozavaptan                             |
| 6.498311   | -0.28283 | -0.034369007 | -3.436900661 | -0.75025 | 0.453106 | 0.641388 | SAR245409 (XL765)                      |
| 6.511883   | -0.32731 | -0.034547813 | -3.454781343 | -1.32758 | 0.184317 | 0.368998 | ITOPRIDINE HYDROCHLORIDE               |
| 6.514548   | -0.41612 | -0.034548312 | -3.454831159 | -0.76558 | 0.443924 | 0.635064 | Levodopa/levodopa-HCl                  |
| 6.44248    | -0.24104 | -0.034548426 | -3.454842577 | -0.58112 | 0.561157 | 0.732006 | Raltegravir                            |
| 6.474216</ |          |              |              |          |          |          |                                        |

|          |          |              |              |           |          |          |                                |
|----------|----------|--------------|--------------|-----------|----------|----------|--------------------------------|
| 6.480007 | -0.25011 | -0.035932112 | -3.593211182 | -0.98489  | 0.324676 | 0.531439 | TERFENADINE                    |
| 6.511883 | -0.3903  | -0.035976094 | -3.597609433 | -0.60514  | 0.545087 | 0.720133 | Betaine                        |
| 6.519828 | -0.40768 | -0.036087948 | -3.608794802 | -0.7997   | 0.423884 | 0.617408 | Cyclovirobuxin D               |
| 6.478566 | -0.24865 | -0.036089013 | -3.608901328 | -0.76966  | 0.441503 | 0.633902 | LASALOCID SODIUM               |
| 6.489958 | -0.26958 | -0.036125636 | -3.612563582 | -0.9902   | 0.322077 | 0.528706 | RITANSERIN                     |
| 6.49693  | -0.28322 | -0.036195368 | -3.61953678  | -0.99211  | 0.321144 | 0.528318 | TERCONAZOLE                    |
| 6.461443 | -0.25591 | -0.036259402 | -3.625940202 | -0.68587  | 0.492793 | 0.675748 | COLISTIN SULFATE               |
| 6.484155 | -0.27179 | -0.036313817 | -3.631381717 | -0.95361  | 0.319561 | 0.526601 | TELITHROMYCIN                  |
| 6.517196 | -0.40172 | -0.036378952 | -3.637895153 | -0.61191  | 0.540585 | 0.715688 | METHYL PARABEN                 |
| 6.525045 | -0.41891 | -0.036440038 | -3.644003821 | -0.8075   | 0.419376 | 0.613536 | Hesperetin                     |
| 6.477121 | -0.24572 | -0.036447172 | -3.644717201 | -0.7773   | 0.436984 | 0.628852 | PRAMOXINE HYDROCHLORIDE        |
| 6.466868 | -0.2886  | -0.036449463 | -3.644946296 | -2.8558   | 0.004293 | 0.021633 | PENICILLIN V POTASSIUM         |
| 6.519828 | -0.40768 | -0.036468627 | -3.646862677 | -0.80814  | 0.419012 | 0.61348  | Peramivir Trihydrate           |
| 6.495544 | -0.29423 | -0.036490508 | -3.649050777 | -1.40223  | 0.160846 | 0.337893 | FENACLOL                       |
| 6.485721 | -0.26317 | -0.036543909 | -3.654390885 | -0.77936  | 0.435768 | 0.627781 | CEFOPERAZONE                   |
| 6.444045 | -0.17976 | -0.036549162 | -3.654916224 | -1.00181  | 0.316437 | 0.522294 | AKLOMIDE                       |
| 6.503791 | -0.37317 | -0.036558882 | -3.655888161 | -0.81029  | 0.417772 | 0.612385 | Eprazinone dihydrochloride     |
| 6.475671 | -0.24422 | -0.036556555 | -3.655655542 | -0.69337  | 0.488078 | 0.672124 | PYRIDOXINE HYDROCHLORIDE       |
| 6.474216 | -0.23495 | -0.036675131 | -3.667513103 | -0.80059  | 0.42337  | 0.617038 | Tizanidine HCl                 |
| 6.494155 | -0.28028 | -0.036883457 | -3.68834568  | -0.7866   | 0.431516 | 0.624819 | SULFASALAZINE                  |
| 6.49276  | -0.27745 | -0.036900923 | -3.690092258 | -0.78697  | 0.431297 | 0.624706 | PHthalylsulfathiazole          |
| 6.475671 | -0.24278 | -0.036997813 | -3.699781257 | -0.78904  | 0.430089 | 0.623458 | PIRENZEPINE HYDROCHLORIDE      |
| 6.482874 | -0.32271 | -0.037047748 | -3.704774843 | -2.9491   | 0.003684 | 0.019053 | PROGESTERONE                   |
| 6.480007 | -0.3166  | -0.037162061 | -3.716206056 | -2.91163  | 0.003595 | 0.018613 | ESTRONE                        |
| 6.489958 | -0.28292 | -0.037172091 | -3.71720961  | -1.42842  | 0.15317  | 0.327582 | RAMIFENAZONE                   |
| 6.519828 | -0.3434  | -0.037372844 | -3.737284391 | -1.43614  | 0.150963 | 0.324216 | THIOCTIC ACID                  |
| 6.459392 | -0.20974 | -0.037378857 | -3.737885738 | -0.79717  | 0.425355 | 0.618522 | QUINACRINE HYDROCHLORIDE       |
| 6.450249 | -0.25775 | -0.037391061 | -3.739106145 | -0.62894  | 0.529389 | 0.706599 | Saquinavir Mesylate            |
| 6.472756 | -0.30615 | -0.037446558 | -3.744655804 | -0.62987  | 0.528778 | 0.706528 | BETAXALOL HYDROCHLORIDE        |
| 6.52763  | -0.42416 | -0.037468138 | -3.746813829 | -0.63023  | 0.528541 | 0.706528 | Ethamsylate                    |
| 6.487138 | -0.26605 | -0.037685944 | -3.768594383 | -0.80372  | 0.421561 | 0.615629 | CEPHALEXIN                     |
| 6.471292 | -0.23535 | -0.037774224 | -3.777422413 | -0.71453  | 0.474901 | 0.661091 | BENOXINATE HYDROCHLORIDE       |
| 6.466868 | -0.22491 | -0.037781269 | -3.778126874 | -0.80575  | 0.420388 | 0.614557 | PYRAZINAMIDE                   |
| 6.474216 | -0.25104 | -0.037982005 | -3.798200517 | -1.45902  | 0.144561 | 0.314519 | DEXFOSFOSERINE HYDROCHLORIDE   |
| 6.515874 | -0.33539 | -0.038077106 | -3.80771056  | -1.4632   | 0.143412 | 0.313523 | THIOPHANATE METHYL             |
| 6.453318 | -0.26435 | -0.038140736 | -3.814073613 | -0.64155  | 0.521166 | 0.700176 | Lypressin Acetate              |
| 6.480007 | -0.25011 | -0.038167168 | -3.816716835 | -0.104616 | 0.295489 | 0.499968 | ETIDRONATE DISODIUM            |
| 6.488551 | -0.27434 | -0.038167431 | -3.816743103 | -0.31389  | 0.415654 | 0.610485 | FENBUFEN                       |
| 6.475671 | -0.30736 | -0.038175086 | -3.817508592 | -2.991    | 0.002781 | 0.014892 | DIPHENYLPYRALINE HYDROCHLORIDE |
| 6.513218 | -0.39346 | -0.038273687 | -3.82736872  | -0.84814  | 0.396362 | 0.593692 | WY-14643 (Pirixic Acid)        |
| 6.517196 | -0.40172 | -0.038384724 | -3.838472448 | -0.64565  | 0.518505 | 0.697882 | Isosorbide                     |
| 6.494155 | -0.28165 | -0.038563739 | -3.856373907 | -0.72946  | 0.465719 | 0.651854 | ETHYNYDIOL DIACETATE           |
| 6.456366 | -0.19948 | -0.038650947 | -3.865094657 | -0.84372  | 0.398827 | 0.594986 | CAL-101 (Ictalisib, GS-1101)   |
| 6.475671 | -0.30736 | -0.038826895 | -3.882689476 | -0.34207  | 0.00235  | 0.012907 | ESTRADIOL CYPIONATE            |
| 6.469822 | -0.2949  | -0.038874388 | -3.887438752 | -3.04579  | 0.002321 | 0.01279  | CYCLOSERIN (D)                 |
| 6.495544 | -0.29423 | -0.038878501 | -3.887850099 | -1.494    | 0.135176 | 0.300132 | OLTIPIAZ                       |
| 6.434569 | -0.16099 | -0.038895361 | -3.889536076 | -0.73574  | 0.461892 | 0.648092 | NITROGLYCERIN                  |
| 6.498311 | -0.28592 | -0.038927045 | -3.892704462 | -1.06698  | 0.285979 | 0.4908   | HOMOSALATE                     |
| 6.501059 | -0.30539 | -0.038949783 | -3.894978277 | -1.49674  | 0.134462 | 0.299454 | ACETANILIDE                    |
| 6.499687 | -0.30262 | -0.038984837 | -3.898483674 | -1.49908  | 0.134112 | 0.298934 | AMPROXICAM                     |
| 6.510545 | -0.3246  | -0.039008747 | -3.900874665 | -1.499    | 0.133873 | 0.298663 | FENTHION                       |
| 6.487138 | -0.33708 | -0.039028096 | -3.90280913  | -0.65647  | 0.511518 | 0.692285 | IVABRADINE HYDROCHLORIDE       |
| 6.49693  | -0.28703 | -0.039081771 | -3.908177103 | -1.50181  | 0.133147 | 0.297702 | GLIACOL                        |
| 6.49693  | -0.28591 | -0.039082995 | -3.908299512 | -0.83351  | 0.404557 | 0.600213 | RITONAVIR                      |
| 6.459392 | -0.27268 | -0.0391112   | -3.911199961 | -3.06441  | 0.002181 | 0.012138 | HOMATROPINE HYDROBROMIDE       |
| 6.448706 | -0.25443 | -0.039188662 | -3.918866237 | -0.65918  | 0.509783 | 0.690866 | Regadenoson                    |
| 6.487138 | -0.26407 | -0.039223066 | -3.92230658  | -1.0751   | 0.282331 | 0.487368 | HYDROCORTISONE BUTYRATE        |
| 6.478566 | -0.31353 | -0.039227958 | -3.922795823 | -0.37349  | 0.002116 | 0.011864 | MELPHALAN                      |
| 6.474216 | -0.30426 | -0.039267566 | -3.926756636 | -3.0766   | 0.002094 | 0.011755 | LEUCOVORIN CALCIUM             |
| 6.494155 | -0.35217 | -0.039340663 | -3.934066341 | -0.66173  | 0.508143 | 0.690217 | Sertaconazole                  |
| 6.498311 | -0.36138 | -0.039349464 | -3.934946434 | -0.87198  | 0.383222 | 0.582224 | Tizoxanide                     |
| 6.510545 | -0.30714 | -0.039374058 | -3.937405784 | -0.8595   | 0.390063 | 0.587466 | Lapatinib                      |
| 6.49693  | -0.28322 | -0.039380672 | -3.938067209 | -1.07942  | 0.280401 | 0.485018 | GADOTERIDOL                    |
| 6.523746 | -0.41581 | -0.039415814 | -3.941581426 | -0.663    | 0.507333 | 0.689553 | Aprotinin                      |
| 6.475671 | -0.30736 | -0.039425266 | -3.942526643 | -3.08895  | 0.002009 | 0.011376 | POTASSIUM p-AMINOENZOATE       |
| 6.450843 | -0.2143  | -0.039539376 | -3.953937623 | -0.74919  | 0.454343 | 0.64243  | THIOPENTAL SODIUM              |
| 6.503791 | -0.28372 | -0.039558516 | -3.955851754 | -0.86383  | 0.387846 | 0.585255 | Ralitrexid                     |
| 6.495544 | -0.2831  | -0.039640185 | -3.964018534 | -0.84539  | 0.397892 | 0.594503 | ALLANTOIN                      |
| 6.440909 | -0.23786 | -0.039662611 | -3.966261138 | -0.87892  | 0.379447 | 0.57924  | Diazotrate Meglumine           |
| 6.487138 | -0.26605 | -0.039712308 | -3.971230793 | -0.84693  | 0.397034 | 0.594042 | ESOMEPRAZOLE POTASSIUM         |
| 6.434569 | -0.22403 | -0.039717397 | -3.971739667 | -0.66807  | 0.50409  | 0.686603 | Otilonium Bromide              |
| 6.477121 | -0.31045 | -0.039717867 | -3.971786699 | -3.11188  | 0.001859 | 0.010623 | CHLOROTHIAZIDE                 |
| 6.477121 | -0.31045 | -0.039732146 | -3.973214648 | -3.113    | 0.001852 | 0.010595 | MANNITOL                       |
| 6.518514 | -0.32298 | -0.039773335 | -3.977333454 | -0.86822  | 0.385274 | 0.583438 | Eslicarbazepine Acetate        |
| 6.472756 | -0.30115 | -0.039851978 | -3.985197766 | -3.12239  | 0.001794 | 0.010343 | LEVOMILNACIPRAN HYDROCHLORIDE  |
| 6.489958 | -0.26623 | -0.039896579 | -3.989657942 | -0.87091  | 0.383803 | 0.582262 | Cobimetinib (GDC-0973, RG7420) |
| 6.471292 | -0.29803 | -0.039921228 | -3.992122804 | -3.12781  | 0.001761 | 0.010166 | PILOCARPINE NITRATE            |
| 6.463893 | -0.28227 | -0.039945553 | -3.994553003 | -3.12972  | 0.00175  | 0.010123 | PHENAZOPYRIDINE HYDROCHLORIDE  |
| 6.4133   | -0.17845 | -0.040077791 | -4.00777908  | -0.88812  | 0.374479 | 0.57544  | Omeprazole sulfide             |
| 6.457892 | -0.25946 | -0.040093976 | -4.009397623 | -3.14177  | 0.001679 | 0.009759 | DEFEROXAMINE MESYLATE          |
| 6.485721 | -0.27434 | -0.040177114 | -4.017711383 | -1.5439   | 0.122618 | 0.252881 | BROMOPRIDE                     |
| 6.421604 | -0.18615 | -0.04024738  | -4.024738011 | -0.67698  | 0.488417 | 0.680505 | Tenofvir Alafenamide (GS-7340) |
| 6.459392 | -0.20549 | -0.040264422 | -4.026442235 | -0.87894  | 0.379434 | 0.57924  | Perampanel                     |
| 6.478566 | -0.2473  | -0.04043993  | -4.043993001 | -1.10845  | 0.267666 | 0.469819 | SULPLASTAT TOSYLATE            |
| 6.521138 | -0.3282  | -0.040495179 | -4.049517904 | -0.88398  | 0.376709 | 0.576779 | Loteprednol etabonate          |
| 6.495544 | -0.2831  | -0.040527677 | -4.052767658 | -0.86432  | 0.387412 | 0.584773 | SULFAPYRIDINE                  |
| 6.475671 | -0.30736 | -0.040581214 | -4.058121424 | -3.17952  | 0.001475 | 0.008722 | AMILORIDE HYDROCHLORIDE        |
| 6.499687 | -0.29285 | -0.040597781 | -4.059778119 | -0.76794  | 0.442524 | 0.634657 | METHYLCLOTHIAZIDE              |
| 6.528917 | -0.36181 | -0.04065842  | -4.065841972 | -1.56239  | 0.118195 | 0.275573 | FENDILINE HYDROCHLORIDE        |
| 6.519828 | -0.40738 | -0.040689083 | -4.068908293 | -0.68441  | 0.493714 | 0.676289 | GLYBURIDE                      |
| 6.49693  | -0.28591 | -0.040720791 | -4.072079145 | -0.86844  | 0.385154 | 0.583429 | DICLAZURIL                     |
| 6.523746 | -0.35134 | -0.040828179 | -4.082817889 | -1.56892  | 0.116667 | 0.273235 | d-LIMONENE                     |
| 6.513218 | -0.39317 | -0.040864638 | -4.086463762 | -0.68737  | 0.491852 | 0.674962 | Diffiprednate                  |
| 6.510545 | -0.38742 | -0.040901246 | -4.090124585 | -0.68798  | 0.491464 | 0.674791 | DORZOLAMIDE                    |
| 6.474216 | -0.30929 | -0.041251788 | -4.125178838 | -0.63988  | 0.487759 | 0.617868 | Sodium butyrate                |
| 6.471292 | -0.23306 | -0.041282826 | -4.128282813 | -1.13154  | 0.257826 | 0.457881 | ALTRAXAMINE                    |
| 6.488551 | -0.26683 | -0.041371172 | -4.13711722  | -1.13398  | 0.256804 | 0.456857 | MILNACIPRAN HYDROCHLORIDE      |
| 6.507856 | -0.30939 | -0.041384131 | -4.138413052 | -0.78281  | 0.433737 | 0.626088 | GLIPIZIDE                      |
| 6.526339 | -0.42139 | -0.041395893 | -4.139589348 | -0.6963   | 0.48624  | 0.671174 | CORTEXOLONE ACETATE            |
| 6.469822 | -0.23019 | -0.041436405 | -4.143640508 | -1.13577  | 0.256054 | 0.455841 | ADIPHENINE HYDROCHLORIDE       |
| 6.495544 | -0.28051 | -0.041441034 | -4.14410345  | -1.13589  | 0.256001 | 0.455841 | SARAFLOXACIN HYDROCHLORIDE     |
| 6.487138 | -0.26605 | -0.041616859 | -4.161685857 | -0.88755  | 0.374784 | 0.57544  | TRIMETHOPRIM                   |
| 6.501059 | -0.2913  | -0.041810481 | -4.181048103 | -1.14602  | 0.251787 | 0.45232  | ENOXACIN                       |
| 6.488551 | -0.26891 | -0.041871409 | -4.187140895 | -0.89298  | 0.371869 | 0.57314  | CIMETIDINE                     |
| 6.480007 | -0.253   | -0.041909827 | -4.190982654 | -0.79276  | 0.42792  | 0.621273 | DIAXOXIDE                      |
| 6.471292 | -0.23306 | -0.041956034 | -4.195603429 | -1.15001  | 0.25014  | 0.450153 | THALIDOMIDE                    |
| 6.481443 | -0.24931 | -0.041974155 | -4.1974155   | -0.91626  | 0.35953  | 0.560722 | Paracetamol                    |
| 6.488551 | -0.28006 | -0.04202037  | -4.202037048 | -1.61473  | 0.108369 | 0.254924 | BORIVUDINE                     |
| 6.507856 | -0.31916 | -0.042030398 | -4.203039765 | -1.6151   | 0.106289 | 0.254894 | ACEFOLUPRINAC                  |
| 6.487138 | -0.2772  | -0.042090538 | -4.209053818 | -1.61743  | 0.105786 | 0.253932 | IDAZOXANINE HYDROCHLORIDE      |
| 6.483893 | -0.28227 | -0.042112029 | -4.211202923 | -3.29946  | 0.000969 | 0.006019 | AMOXICILLIN                    |
| 6.487138 | -0.2660  |              |              |           |          |          |                                |

|          |          |              |              |          |          |          |                                                |
|----------|----------|--------------|--------------|----------|----------|----------|------------------------------------------------|
| 6.487138 | -0.26605 | -0.043724457 | -4.372445714 | -0.9325  | 0.35108  | 0.552916 | MEBENDAZOLE                                    |
| 6.482874 | -0.25572 | -0.043813593 | -4.381359347 | -1.20092 | 0.22978  | 0.426725 | NABUMETONE                                     |
| 6.521138 | -0.4105  | -0.043837277 | -4.38372774  | -0.97142 | 0.331337 | 0.53634  | Magnolol                                       |
| 6.498311 | -0.28592 | -0.043901316 | -4.390131558 | -1.20333 | 0.228849 | 0.425456 | DIPYRONE                                       |
| 6.489598 | -0.27177 | -0.043905997 | -4.390599691 | -0.93637 | 0.349084 | 0.551298 | NITARSONE                                      |
| 6.49693  | -0.28591 | -0.04400432  | -4.400432011 | -0.93847 | 0.348005 | 0.550577 | TRETINOIN                                      |
| 6.497138 | -0.25744 | -0.044025211 | -4.402521098 | -0.83277 | 0.404974 | 0.600463 | FAMPRIIDINE                                    |
| 6.478566 | -0.31549 | -0.044068278 | -4.40682781  | -3.45276 | 0.006555 | 0.003605 | ACETAZOLAMIDE                                  |
| 6.514548 | -0.38603 | -0.044164961 | -4.416496133 | -0.74288 | 0.457555 | 0.644302 | ALGINIC ACID [Mol Wt ~200,000; monomers shown] |
| 6.523746 | -0.35134 | -0.044211933 | -4.421193326 | -1.69895 | 0.089329 | 0.226584 | LOXOPROFEN                                     |
| 6.510545 | -0.30714 | -0.044277892 | -4.427789224 | -0.96655 | 0.333769 | 0.537727 | Silodosin                                      |
| 6.526045 | -0.35397 | -0.044397761 | -4.439776054 | -1.70609 | 0.087992 | 0.224324 | PROTONAMIDE                                    |
| 6.494155 | -0.28028 | -0.044446762 | -4.444676168 | -0.9479  | 0.34318  | 0.545963 | HYDRASTINE (1R, 9S)                            |
| 6.487138 | -0.26063 | -0.044621391 | -4.462139139 | -0.97405 | 0.330032 | 0.535923 | Lacidipine                                     |
| 6.515874 | -0.39888 | -0.044657747 | -4.465774659 | -0.75117 | 0.452552 | 0.640958 | Acidiniun Bromide                              |
| 6.514548 | -0.39632 | -0.044723805 | -4.472380514 | -0.99107 | 0.321651 | 0.528346 | Zoledronic Acid Monohydrate                    |
| 6.485721 | -0.26317 | -0.044740221 | -4.474022065 | -0.95416 | 0.340003 | 0.543281 | SULFACETAMIDE                                  |
| 6.515874 | -0.39918 | -0.044753808 | -4.47538076  | -0.99173 | 0.321327 | 0.528322 | Potassium guaiaacolsulfonate                   |
| 6.498311 | -0.36111 | -0.044758105 | -4.475810482 | -0.75286 | 0.451536 | 0.640229 | Escitalopram                                   |
| 6.528917 | -0.42693 | -0.044831572 | -4.483157167 | -0.75409 | 0.450794 | 0.639857 | SODIUM PHENYLACETATE                           |
| 6.522444 | -0.41331 | -0.044872992 | -4.487299183 | -0.99438 | 0.32004  | 0.527221 | Istradefylline                                 |
| 6.471292 | -0.23306 | -0.045138879 | -4.513887913 | -1.23728 | 0.215984 | 0.411005 | AMCINONIDE                                     |
| 6.450249 | -0.19119 | -0.045191985 | -4.51919851  | -0.96915 | 0.33547  | 0.539294 | PIMOZIDE                                       |
| 6.482874 | -0.25739 | -0.045190747 | -4.519074676 | -0.96377 | 0.335162 | 0.539124 | PIPERIDOLATE HYDROCHLORIDE                     |
| 6.49276  | -0.28859 | -0.045276635 | -4.527663481 | -1.73986 | 0.081884 | 0.213139 | IPRONIAZID PHOSPHATE                           |
| 6.528917 | -0.42724 | -0.045326736 | -4.532673574 | -1.00443 | 0.315171 | 0.521389 | Pantaprevir                                    |
| 6.491362 | -0.27461 | -0.045349298 | -4.534929766 | -0.96715 | 0.33347  | 0.537727 | beta-CYCLODEXTRIN                              |
| 6.49693  | -0.28322 | -0.045379615 | -4.53796152  | -1.24385 | 0.213555 | 0.408874 | THIAMPHENICOL                                  |
| 6.437751 | -0.16583 | -0.045596336 | -4.559633641 | -0.97242 | 0.330843 | 0.536321 | PROPYLTHIOURACIL                               |
| 6.475671 | -0.24422 | -0.045810232 | -4.581023233 | -0.86654 | 0.386197 | 0.584123 | TADALAFIL                                      |
| 6.515874 | -0.39918 | -0.045816596 | -4.581659633 | -1.01529 | 0.309969 | 0.515441 | 4-Hydroxyantipyrine                            |
| 6.460898 | -0.27588 | -0.045956461 | -4.595646076 | -3.60067 | 0.000317 | 0.002184 | DICLOFENAC SODIUM                              |
| 6.514548 | -0.32294 | -0.04597338  | -4.597338018 | -0.86962 | 0.384507 | 0.582621 | NATAMYCIN                                      |
| 6.472756 | -0.23686 | -0.045993764 | -4.599376407 | -0.98089 | 0.326645 | 0.532215 | ARECOLINE HYDROBROMIDE                         |
| 6.481443 | -0.25449 | -0.046055134 | -4.605513381 | -0.9822  | 0.326    | 0.531906 | SISOMICIN SULFATE                              |
| 6.488551 | -0.26891 | -0.046084469 | -4.608446867 | -0.98283 | 0.325692 | 0.531906 | BALSALAZIDE DISODIUM                           |
| 6.49693  | -0.28693 | -0.046123468 | -4.61234681  | -1.26423 | 0.206146 | 0.387863 | KETANSERIN                                     |
| 6.510545 | -0.14884 | -0.04612797  | -4.612797013 | -0.87255 | 0.382911 | 0.532152 | FLUXININ MEGLUMINE                             |
| 6.462398 | -0.27908 | -0.046155881 | -4.615588097 | -3.61629 | 0.000299 | 0.002079 | MERCAPTOPURINE                                 |
| 6.474216 | -0.30426 | -0.046179474 | -4.617947419 | -3.61814 | 0.000297 | 0.00207  | FURAZOLIDONE                                   |
| 6.478566 | -0.31353 | -0.046271394 | -4.627139386 | -3.62534 | 0.000289 | 0.002021 | BENZTHIAZIDE                                   |
| 6.477121 | -0.31045 | -0.046327159 | -4.632715905 | -3.62971 | 0.000284 | 0.001993 | BENSERAZIDE HYDROCHLORIDE                      |
| 6.5302   | -0.42969 | -0.046394076 | -4.639407608 | -0.78037 | 0.435171 | 0.62745  | CLORGLINE HYDROCHLORIDE                        |
| 6.499687 | -0.29285 | -0.046432727 | -4.643272694 | -0.87831 | 0.379775 | 0.579568 | BURAMATE                                       |
| 6.41133  | -0.17845 | -0.046443586 | -4.644358648 | -1.02918 | 0.303395 | 0.507842 | Testosterone Phenylpropionate                  |
| 6.495544 | -0.28051 | -0.046493144 | -4.64931414  | -1.27865 | 0.20102  | 0.391786 | DABIGATRAN ETEXILATE MESYLATE                  |
| 6.50515  | -0.29931 | -0.046706932 | -4.670693165 | -1.28023 | 0.200464 | 0.391448 | BUTACIANE SULFATE                              |
| 6.459392 | -0.27764 | -0.046765175 | -4.676517474 | -1.03631 | 0.300059 | 0.504347 | Daurisoline                                    |
| 6.507856 | -0.3046  | -0.046889535 | -4.688953461 | -1.28524 | 0.19871  | 0.389956 | ACETOPHENAZINE MALEATE                         |
| 6.50515  | -0.31368 | -0.047069636 | -4.706963588 | -1.80876 | 0.070488 | 0.192172 | DICHLORISONE ACETATE                           |
| 6.471292 | -0.29803 | -0.047187676 | -4.718767621 | -3.69714 | 0.000218 | 0.001561 | PRIMIDONE                                      |
| 6.498311 | -0.23983 | -0.047281247 | -4.728124674 | -1.81689 | 0.069234 | 0.189864 | CHLORPHENIRAMINE MALEATE                       |
| 6.480007 | -0.24646 | -0.047331156 | -4.733115643 | -1.0332  | 0.30151  | 0.505478 | Resveratrol                                    |
| 6.49693  | -0.29151 | -0.047334238 | -4.733423814 | -1.00948 | 0.312744 | 0.518814 | ENALAPRIL MALEATE                              |
| 6.510545 | -0.38771 | -0.047459307 | -4.745930748 | -1.05169 | 0.292943 | 0.497366 | Bromisoval                                     |
| 6.49693  | -0.28727 | -0.047477334 | -4.747733368 | -0.89807 | 0.369148 | 0.569696 | PROTRYPTILINE HYDROCHLORIDE                    |
| 6.475671 | -0.24278 | -0.04752873  | -4.75287309  | -1.01457 | 0.310311 | 0.515841 | PHENACETIN                                     |
| 6.471292 | -0.23535 | -0.047610326 | -4.761032579 | -0.90059 | 0.367809 | 0.568937 | MUPIROCI                                       |
| 6.519828 | -0.40768 | -0.047781738 | -4.778173766 | -1.05883 | 0.289676 | 0.494051 | Cevimeline hydrochloride hemihydrate           |
| 6.511883 | -0.32731 | -0.047822307 | -4.78223066  | -1.83768 | 0.066109 | 0.183187 | BARBITAL                                       |
| 6.502427 | -0.2984  | -0.047856845 | -4.785684547 | -0.90525 | 0.365334 | 0.566386 | FOMEPIZOLE HYDROCHLORIDE                       |
| 6.477121 | -0.31045 | -0.047873404 | -4.787340435 | -3.75086 | 0.000176 | 0.001282 | ORPHENADRINE CITRATE                           |
| 6.503791 | -0.29665 | -0.047873697 | -4.787369735 | -1.31221 | 0.189449 | 0.376837 | SULFANILATE ZINC                               |
| 6.474216 | -0.23982 | -0.047977615 | -4.797761507 | -1.0232  | 0.306212 | 0.510354 | SODIUM SALICYLATE                              |
| 6.463893 | -0.28227 | -0.04800189  | -4.800189448 | -3.76093 | 0.000169 | 0.001233 | CYCLOZINE                                      |
| 6.451786 | -0.20562 | -0.04804542  | -4.804542194 | -1.84699 | 0.064748 | 0.180464 | SAPROMYCIN SULFATE [4mM]                       |
| 6.446583 | -0.2219  | -0.048124052 | -4.81240523  | -0.12633 | 0.304736 | 0.508891 | NALOXONE HYDROCHLORIDE                         |
| 6.447158 | -0.18118 | -0.048230673 | -4.823067322 | -1.05284 | 0.292416 | 0.407088 | Tebipenem Pivoxil                              |
| 6.509203 | -0.31212 | -0.048261592 | -4.826159156 | -0.9129  | 0.361293 | 0.562564 | CLOZAPINE                                      |
| 6.488551 | -0.2703  | -0.04843794  | -4.843793969 | -0.91624 | 0.359541 | 0.560722 | CLOMIPRAMINE HYDROCHLORIDE                     |
| 6.487138 | -0.33708 | -0.048476052 | -4.847605218 | -0.81539 | 0.414847 | 0.610174 | TUBUCONAZOLE                                   |
| 6.509203 | -0.38453 | -0.048642226 | -4.86422261  | -0.81819 | 0.413249 | 0.608348 | BRIMONIDINE                                    |
| 6.480007 | -0.3166  | -0.048654009 | -4.865400872 | -3.81202 | 0.000138 | 0.001027 | CEPHAPIRIN SODIUM                              |
| 6.49276  | -0.28859 | -0.048657729 | -4.865772925 | -1.86979 | 0.061513 | 0.173173 | PRASTERONE ACETATE                             |
| 6.523746 | -0.34157 | -0.04867673  | -4.867673013 | -0.92076 | 0.357177 | 0.557814 | PREGNENOLONE SUCCINATE                         |
| 6.480007 | -0.25157 | -0.048730967 | -4.873096727 | -1.03927 | 0.29868  | 0.502973 | AZAPERONE                                      |
| 6.515874 | -0.39888 | -0.048740864 | -4.874086378 | -0.81985 | 0.412303 | 0.607479 | Neofenopren Calcium                            |
| 6.528917 | -0.42693 | -0.048829212 | -4.882921223 | -0.82133 | 0.411456 | 0.607373 | PROCARBAZINE HYDROCHLORIDE                     |
| 6.491362 | -0.27233 | -0.048852784 | -4.885278357 | -1.33905 | 0.180555 | 0.36424  | MEPHYLCAINE HYDROCHLORIDE                      |
| 6.510545 | -0.3246  | -0.048970513 | -4.897051317 | -1.87796 | 0.060385 | 0.171061 | CHLORPYRIFOS                                   |
| 6.4843   | -0.25499 | -0.04897216  | -4.8972161   | -1.06894 | 0.280044 | 0.49908  | Rucaparib (AG-014699, PF-01367338)             |
| 6.481443 | -0.25449 | -0.048930457 | -4.893045711 | -1.04352 | 0.296706 | 0.500886 | NITRENDIPINE                                   |
| 6.469822 | -0.2949  | -0.048961405 | -4.896140477 | -3.83611 | 0.000125 | 0.000937 | DIBENZOTHIOPHENE                               |
| 6.471292 | -0.30324 | -0.048991712 | -4.899171181 | -1.08565 | 0.277636 | 0.48121  | Eptifibatid                                    |
| 6.503791 | -0.37289 | -0.04914879  | -4.914879013 | -0.82671 | 0.408401 | 0.60434  | Calcipotriene                                  |
| 6.513218 | -0.32025 | -0.049191647 | -4.919164687 | -0.9305  | 0.352114 | 0.554033 | ACAMPROSATE CALCIUM                            |
| 6.50515  | -0.30391 | -0.049306413 | -4.930641258 | -0.93267 | 0.350991 | 0.552916 | BETAMETHASONE SODIUM PHOSPHATE                 |
| 6.485721 | -0.33404 | -0.049330326 | -4.933032601 | -0.82976 | 0.406673 | 0.602304 | Vigabatrin                                     |
| 6.491362 | -0.27599 | -0.04934417  | -4.934417011 | -0.93338 | 0.350623 | 0.552916 | ITRACONAZOLE HYDROCHLORIDE                     |
| 6.494155 | -0.27779 | -0.049421859 | -4.942185903 | -1.35465 | 0.17553  | 0.358768 | MEPIVACAINE HYDROCHLORIDE                      |
| 6.498311 | -0.28871 | -0.0495895   | -4.958950038 | -1.05758 | 0.290248 | 0.494232 | SULFATHIAZOLE                                  |
| 6.507856 | -0.30939 | -0.049652659 | -4.965265947 | -0.93929 | 0.347584 | 0.550288 | ASPARAGINE (L) HYDRATE                         |
| 6.517196 | -0.40172 | -0.04967137  | -4.967137008 | -0.8355  | 0.403436 | 0.599244 | Levofloxacin-HCl                               |
| 6.487138 | -0.26407 | -0.049767897 | -4.976789739 | -1.36413 | 0.172526 | 0.354611 | VINPOCETINE                                    |
| 6.471292 | -0.23389 | -0.049838974 | -4.983897426 | -1.0629  | 0.287828 | 0.492211 | alpha-TOCOPHEROL [4 mM]                        |
| 6.518514 | -0.32289 | -0.049839406 | -4.98394057  | -1.08795 | 0.276616 | 0.480167 | Cobistat (GS-935)                              |
| 6.478566 | -0.31353 | -0.049854303 | -4.985430259 | -3.90606 | 0.38E-05 | 0.000717 | DESIPRAMINE HYDROCHLORIDE                      |
| 6.522444 | -0.3487  | -0.049857082 | -4.985708245 | -1.91587 | 0.055381 | 0.160926 | PEMPIDINE TARTRATE                             |
| 6.534026 | -0.43792 | -0.049884299 | -4.988429895 | -0.83908 | 0.401424 | 0.597989 | Erosartan Mesylate                             |
| 6.515874 | -0.39888 | -0.049900225 | -4.990022517 | -0.83935 | 0.401273 | 0.597939 | ANAZOLENE SODIUM                               |
| 6.511883 | -0.32731 | -0.049975827 | -4.99758275  | -1.92044 | 0.054803 | 0.159729 | CARMOFUR                                       |
| 6.481443 | -0.31966 | -0.05001401  | -5.001400987 | -3.91858 | 8.91E-05 | 0.000685 | CORTISONE ACETATE                              |
| 6.480007 | -0.3166  | -0.050084755 | -5.008475509 | -3.92412 | 8.70E-05 | 0.000671 | NITROMIDE                                      |
| 6.52763  | -0.34943 | -0.050175118 | -5.017511801 | -0.9491  | 0.34257  | 0.545215 | CASANTHRANOL [cascarioides A shown]            |
| 6.478566 | -0.31353 | -0.050260251 | -5.026025059 | -3.93787 | 8.22E-05 | 0.000638 | HYDROCORTISONE                                 |
| 6.507856 | -0.31916 | -0.050276758 | -5.027675776 | -1.932   | 0.053359 | 0.157283 | SILIBININ                                      |
| 6.509203 | -0.30448 | -0.050291067 | -5.029106732 | -1.09781 | 0.272286 | 0.47467  | Telivudine                                     |
| 6.494155 | -0.28028 | -0.050255329 | -5.025532948 | -1.07754 | 0.281241 | 0.486306 | MEFEXAMIDE HYDROCHLORIDE                       |
| 6.507856 | -0.38164 | -0.050384846 | -5.038484853 | -0.85009 | 0.395278 | 0.592627 | VALETHAMATE BROMIDE                            |
| 6.522444 | -0.41301 | -0.050606141 | -5.060614051 | -0.85122 | 0.394645 | 0.591852 | GRANISETRON HYDROCHLORIDE                      |
| 6.480007 | -0.32175 | -0.050686349 | -5.068634916 | -0.85257 | 0.393896 | 0.591598 | AST                                            |

|          |          |              |              |           |          |            |                                          |
|----------|----------|--------------|--------------|-----------|----------|------------|------------------------------------------|
| 6.491362 | -0.28576 | -0.051908958 | -5.190895769 | -1.99472  | 0.046073 | 0.142362   | MOGULSTEINE                              |
| 6.444045 | -0.17499 | -0.052049416 | -5.204941642 | -1.1362   | 0.255874 | 0.455841   | Telotristat Etiprate (LX 1606 Hippurate) |
| 6.511883 | -0.31755 | -0.05220759  | -5.220759001 | -0.98755  | 0.323375 | 0.529879   | MODALINE SULFATE                         |
| 6.509203 | -0.31212 | -0.052208037 | -5.220803704 | -0.98755  | 0.323371 | 0.529879   | NETILMICIN SULFATE                       |
| 6.521138 | -0.33629 | -0.052212564 | -5.221256351 | -0.98764  | 0.323329 | 0.529879   | FLUOROMETHOLONE                          |
| 6.480007 | -0.25011 | -0.052217312 | -5.221731229 | -1.43127  | 0.152353 | 0.326331   | CHLORPROTHIXENE HYDROCHLORIDE            |
| 6.498511 | -0.28283 | -0.052256769 | -5.225676966 | -1.14157  | 0.253631 | 0.453577   | Clazapril Monohydrate                    |
| 6.505151 | -0.30391 | -0.052339684 | -5.233968491 | -0.921624 | 0.321624 | 0.528346   | MIANSERIN HYDROCHLORIDE                  |
| 6.491362 | -0.27233 | -0.052622739 | -5.262273863 | -1.44238  | 0.149195 | 0.321227   | TRILOSTANE                               |
| 6.477121 | -0.31554 | -0.052646595 | -5.264659467 | -0.88554  | 0.375863 | 0.576345   | Ulipristal                               |
| 6.494155 | -0.28028 | -0.052650105 | -5.265010489 | -1.12285  | 0.261501 | 0.462003   | MESNA                                    |
| 6.52763  | -0.42416 | -0.052681868 | -5.268186801 | -0.88614  | 0.375543 | 0.5762     | ORNITHINE aKETOGLUTARATE                 |
| 6.503791 | -0.29665 | -0.05273273  | -5.273273047 | -1.4454   | 0.148346 | 0.320343   | OXIGLUTATIONE                            |
| 6.448706 | -0.25464 | -0.05277586  | -5.277586009 | -1.1695   | 0.242201 | 0.440993   | Cefprozil                                |
| 6.472756 | -0.23205 | -0.052872208 | -5.287220763 | -1.15416  | 0.248436 | 0.4482     | Ibutilide Fumarate                       |
| 6.495544 | -0.28051 | -0.053098367 | -5.309836665 | -1.45542  | 0.145553 | 0.315883   | OLMESARTAN MEDOXOMIL                     |
| 6.480007 | -0.3166  | -0.053127767 | -5.312776735 | -4.16254  | 3.15E-05 | 0.000266   | GALLAMINE TRIETHIODIDE                   |
| 6.487138 | -0.2772  | -0.053176714 | -5.31767145  | -2.04344  | 0.041009 | 0.130091   | beta-NAPHTHOL                            |
| 6.475671 | -0.30736 | -0.053254203 | -5.325420311 | -4.17244  | 3.01E-05 | 0.000256   | IPRATROPIUM BROMIDE                      |
| 6.525045 | -0.41891 | -0.053289652 | -5.328965172 | -1.18089  | 0.237647 | 0.434711   | Abiraterone                              |
| 6.468347 | -0.22329 | -0.053304319 | -5.330431884 | -1.16359  | 0.24459  | 0.443076   | Barettinib (INNO-406)                    |
| 6.510545 | -0.30986 | -0.053309095 | -5.330909494 | -1.46119  | 0.143962 | 0.314113   | URETHANE                                 |
| 6.472756 | -0.24808 | -0.053348819 | -5.334881958 | -2.05005  | 0.040359 | 0.128507   | FTAXILIDE                                |
| 6.480007 | -0.25157 | -0.053378509 | -5.337850923 | -1.13839  | 0.25496  | 0.454841   | SULFACHLORPYRIDAZINE                     |
| 6.499687 | -0.29151 | -0.053380446 | -5.338044633 | -1.13843  | 0.254942 | 0.454841   | CEFUROXIME SODIUM                        |
| 6.532754 | -0.43518 | -0.053569972 | -5.356997152 | -0.90108  | 0.367548 | 0.568705   | ACETAMINOSALOL                           |
| 6.526339 | -0.35659 | -0.05370927  | -5.370926978 | -2.0639   | 0.039027 | 0.125199   | CARZENIDE                                |
| 6.499687 | -0.28862 | -0.053709504 | -5.370950374 | -1.47217  | 0.140975 | 0.309251   | BENZYL ALCOHOL                           |
| 6.522444 | -0.41301 | -0.053730107 | -5.373010693 | -0.90377  | 0.366117 | 0.567075   | GLYCYRRHIZIC ACID, AMMONIUM SALT         |
| 6.482874 | -0.32271 | -0.053778248 | -5.37782478  | -4.2135   | 2.51E-05 | 0.000219   | LACTULOSE                                |
| 6.532754 | -0.4355  | -0.053855608 | -5.385560757 | -1.19343  | 0.232701 | 0.429492   | Ginsenoside Rc                           |
| 6.506505 | -0.37873 | -0.053938389 | -5.393838948 | -0.90727  | 0.364262 | 0.565501   | EMEDASTINE DIFUMARATE                    |
| 6.44248  | -0.18677 | -0.053963666 | -5.396366634 | -2.07368  | 0.038109 | 0.122716   | OXEDRINE                                 |
| 6.519828 | -0.40768 | -0.053976265 | -5.397626516 | -1.1961   | 0.231657 | 0.428034   | Gastrodenol                              |
| 6.468098 | -0.28087 | -0.054039644 | -5.403964375 | -1.19751  | 0.231109 | 0.427973   | Naringin                                 |
| 6.505151 | -0.37582 | -0.054046496 | -5.40464965  | -0.90909  | 0.363302 | 0.564695   | METACRESOL                               |
| 6.50427  | -0.29707 | -0.054106773 | -5.410677335 | -1.15301  | 0.249695 | 0.448987   | PIZOTYLININE MALATE                      |
| 6.511883 | -0.3273  | -0.054140673 | -5.414067335 | -2.08048  | 0.037481 | 0.120858   | TIMONACIC                                |
| 6.448706 | -0.18426 | -0.054154068 | -5.415406769 | -1.18214  | 0.23715  | 0.434415   | Sivelestat sodium                        |
| 6.472756 | -0.30115 | -0.054216903 | -5.421690256 | -4.24787  | 2.16E-05 | 0.000191   | NORTRIPTYLINE HYDROCHLORIDE              |
| 6.507856 | -0.3018  | -0.054217115 | -5.42171154  | -1.18352  | 0.236605 | 0.433889   | Stratostaurin                            |
| 6.503791 | -0.29372 | -0.05442268  | -5.442267995 | -1.18844  | 0.23466  | 0.431869   | Roscovitine (Seliciclib,CYC202)          |
| 6.489958 | -0.27177 | -0.054469211 | -5.446921059 | -1.16165  | 0.245379 | 0.443937   | IODIPAMIDE                               |
| 6.540329 | -0.38492 | -0.054535698 | -5.453569838 | -2.09566  | 0.036112 | 0.116979   | DINITOLMIDE                              |
| 6.489958 | -0.26623 | -0.054544183 | -5.454418301 | -1.19066  | 0.233789 | 0.43073    | Clevidipine Butyrate                     |
| 6.489958 | -0.26958 | -0.05456513  | -5.456513035 | -1.49562  | 0.134752 | 0.299579   | PAROXETINE HYDROCHLORIDE                 |
| 6.468347 | -0.29176 | -0.054676263 | -5.467626295 | -4.28386  | 1.84E-05 | 0.000164   | GLUCOSAMINE HYDROCHLORIDE                |
| 6.462398 | -0.21584 | -0.054761666 | -5.476166632 | -1.16788  | 0.242854 | 0.441818   | LEVETIRACETAM                            |
| 6.475671 | -0.23784 | -0.054831475 | -5.483147506 | -1.19693  | 0.231335 | 0.427973   | Ambrisentan                              |
| 6.465383 | -0.2903  | -0.054864307 | -5.486430742 | -0.92285  | 0.356086 | 0.557283   | Silver Sulfadiazine                      |
| 6.501059 | -0.2913  | -0.054924715 | -5.492471488 | -1.50548  | 0.132201 | 0.296612   | DICLORALUREA                             |
| 6.494155 | -0.28185 | -0.054935311 | -5.493531114 | -1.03914  | 0.298738 | 0.502973   | AMYLENE HYDRATE                          |
| 6.4843   | -0.28029 | -0.054955104 | -5.495510427 | -1.17201  | 0.241194 | 0.439783   | CEFORANIDE                               |
| 6.501059 | -0.29563 | -0.055038695 | -5.503869481 | -1.0411   | 0.29783  | 0.502104   | TICLOPIDINE HYDROCHLORIDE                |
| 6.494155 | -0.28028 | -0.055239496 | -5.523949628 | -1.17807  | 0.238767 | 0.435825   | RACTOPAMINE HYDROCHLORIDE                |
| 6.514548 | -0.39632 | -0.055316895 | -5.531689518 | -1.22581  | 0.22027  | 0.416156   | Coenzyme Q10 (CoQ10)                     |
| 6.507856 | -0.38164 | -0.05547416  | -5.547416035 | -0.93311  | 0.350765 | 0.552916   | Sodium Picosulfate                       |
| 6.506505 | -0.31642 | -0.055551157 | -5.555115694 | -2.13468  | 0.032787 | 0.108513   | BUCETIN                                  |
| 6.468347 | -0.23915 | -0.055577939 | -5.557793924 | -2.13571  | 0.032703 | 0.108375   | TAMSULOSIN HYDROCHLORIDE                 |
| 6.521138 | -0.34605 | -0.055729117 | -5.572911682 | -2.14152  | 0.032232 | 0.1073     | EBSELEN                                  |
| 6.519828 | -0.3434  | -0.055877083 | -5.587708333 | -2.14721  | 0.031777 | 0.106408   | CARSALAM                                 |
| 6.482874 | -0.32271 | -0.055885788 | -5.588578782 | -4.37863  | 1.19E-05 | 0.00011    | HETACILLIN POTASSIUM                     |
| 6.454845 | -0.26763 | -0.055888845 | -5.588884506 | -0.94008  | 0.347176 | 0.549981   | Ropivacaine HCl Monohydrate              |
| 6.462398 | -0.2841  | -0.055926942 | -5.592694198 | -1.23933  | 0.215224 | 0.410577   | Dipivefrin hydrochloride                 |
| 6.51196  | -0.40202 | -0.056009094 | -5.600909385 | -2.14115  | 0.21455  | 0.410217   | Nicotine                                 |
| 6.471292 | -0.23535 | -0.05628929  | -5.628929    | -1.06475  | 0.286987 | 0.491251   | NOCODAZOLE                               |
| 6.522444 | -0.33079 | -0.056375687 | -5.637568711 | -2.20663  | 0.21846  | 0.413804   | Tagabine                                 |
| 6.510545 | -0.31484 | -0.056427016 | -5.642701566 | -1.06736  | 0.285809 | 0.4908     | ORNIDAZOLE                               |
| 6.482874 | -0.28857 | -0.056512421 | -5.651242081 | -2.17162  | 0.029884 | 0.101397   | CLOFECTOL                                |
| 6.4843   | -0.32575 | -0.056513923 | -5.651392312 | -4.42784  | 9.52E-06 | 8.89E-05   | PARACHLOROPHENOL                         |
| 6.505151 | -0.31368 | -0.056592956 | -5.659295618 | -2.17472  | 0.029651 | 0.100776   | ATROPINE OXIDE                           |
| 6.499687 | -0.29151 | -0.056707016 | -5.670701612 | -1.20937  | 0.22652  | 0.423279   | NEBIVOLOL HYDROCHLORIDE                  |
| 6.514548 | -0.39603 | -0.05671312  | -5.671312007 | -0.95395  | 0.340111 | 0.543281   | Risedronic Acid                          |
| 6.510545 | -0.38771 | -0.056912343 | -5.691234305 | -1.26117  | 0.207249 | 0.399517   | Methyl hesperidin                        |
| 6.52763  | -0.42416 | -0.056962708 | -5.696270807 | -0.95814  | 0.33799  | 0.541461   | Balsalazide                              |
| 6.487138 | -0.26407 | -0.057041782 | -5.704178248 | -1.56351  | 0.117933 | 0.275252   | LORATADINE                               |
| 6.477121 | -0.25692 | -0.057160605 | -5.716060495 | -2.19653  | 0.028054 | 0.096655   | BUFEXAMAC                                |
| 6.478566 | -0.25008 | -0.057262621 | -5.7262621   | -1.08317  | 0.278735 | 0.482754   | OXIRACETAM                               |
| 6.459392 | -0.20549 | -0.057265259 | -5.726525888 | -1.25005  | 0.21128  | 0.405455   | Nandrolone                               |
| 6.506505 | -0.30534 | -0.057347951 | -5.73479535  | -1.22297  | 0.22134  | 0.417157   | BRETYLIUM TOSYLATE                       |
| 6.5302   | -0.43    | -0.057380003 | -5.738000257 | -1.27126  | 0.203635 | 0.394929   | Benzidaz                                 |
| 6.526339 | -0.33853 | -0.057557725 | -5.755772502 | -1.25644  | 0.208957 | 0.401923   | Entecavir Hydrate                        |
| 6.450249 | -0.25775 | -0.05772928  | -5.772928039 | -0.97104  | 0.331529 | 0.536482   | Rupatadine Fumarate                      |
| 6.468347 | -0.29176 | -0.05775633  | -5.775632987 | -4.52518  | 6.03E-06 | 5.79E-05   | AZATHIOPRINE                             |
| 6.507856 | -0.38192 | -0.05794692  | -5.794691956 | -1.28409  | 0.19911  | 0.390441   | Mildronate                               |
| 6.499687 | -0.28862 | -0.058008971 | -5.800897098 | -1.59002  | 0.111831 | 0.26563    | ATORVASTATIN CALCIUM                     |
| 6.515874 | -0.39888 | -0.058242668 | -5.824266754 | -0.97967  | 0.327247 | 0.532583   | TETRABENAZINE                            |
| 6.480007 | -0.3166  | -0.05845073  | -5.845072967 | -4.57959  | 4.66E-06 | 4.55E-05   | NORGESTIMATE                             |
| 6.49276  | -0.27507 | -0.058714963 | -5.871496271 | -1.60937  | 0.107536 | 0.257218   | OLMESARTAN                               |
| 6.502427 | -0.29707 | -0.058957498 | -5.89574984  | -1.25737  | 0.208621 | 0.401556   | ESTRADIOL BENZOATE                       |
| 6.531479 | -0.43244 | -0.059048092 | -5.904809209 | -0.99322  | 0.320602 | 0.527977   | Terfenomide                              |
| 6.535294 | -0.37472 | -0.059131172 | -5.913171981 | -2.27227  | 0.02307  | 0.082774   | PREGNENOLONE                             |
| 6.501059 | -0.2913  | -0.059157825 | -5.915782465 | -1.62151  | 0.104909 | 0.252768   | METHYLPREDNISOLONE SODIUM SUCCINATE      |
| 6.494155 | -0.29141 | -0.059254703 | -5.925470288 | -2.277    | 0.022786 | 0.082117   | FEBUXOSTAT                               |
| 6.505151 | -0.2949  | -0.059261895 | -5.926189459 | -1.62689  | 0.331739 | 0.510104   | MODAFINIL                                |
| 6.485721 | -0.32878 | -0.059358536 | -5.935853603 | -4.65072  | 3.31E-06 | 3.30E-05   | PHENOLPHTHALEIN                          |
| 6.519828 | -0.40738 | -0.059370003 | -5.937000348 | -0.99864  | 0.317971 | 0.52415    | Mezlocillin Sodium                       |
| 6.498311 | -0.28283 | -0.059467175 | -5.946717508 | -1.29812  | 0.194246 | 0.383992   | Doxercalciferol                          |
| 6.491362 | -0.27461 | -0.059513537 | -5.951353676 | -1.26922  | 0.204361 | 0.395886   | VANCOMYCIN HYDROCHLORIDE                 |
| 6.521138 | -0.4102  | -0.059688793 | -5.968879337 | -1.004    | 0.315379 | 0.521557   | Ondansetron                              |
| 6.515874 | -0.32029 | -0.05978572  | -5.978572042 | -1.63872  | 0.101272 | 0.247264   | CLOBETASOL PROPIONATE                    |
| 6.501059 | -0.29563 | -0.059868638 | -5.9868638   | -1.13246  | 0.257441 | 0.457514   | ETHAMIVAN                                |
| 6.477121 | -0.24715 | -0.05989698  | -5.989698033 | -1.133    | 0.257216 | 0.457272   | LEVODOPA                                 |
| 6.521138 | -0.3282  | -0.05992242  | -5.99224199  | -1.30958  | 0.190337 | 0.37831    | Camostat Mesilate                        |
| 6.514548 | -0.39632 | -0.060141876 | -6.014187609 | -1.33273  | 0.18262  | 0.36696    | Alizapride hydrochloride                 |
| 6.4843   | -0.25851 | -0.060173086 | -6.0173086   | -1.64934  | 0.099079 | 0.244356   | FOMEPIZOLE                               |
| 6.498311 | -0.28871 | -0.060178729 | -6.017872919 | -1.28341  | 0.199348 | 0.390609   | OFLOXACIN                                |
| 6.5302   | -0.3644  | -0.060250485 | -6.025048533 | -2.31526  | 0.020598 | 0.076202   | LOBELINE HYDROCHLORIDE                   |
| 6.469822 | -0.2949  | -0.060261895 | -6.026189459 | -4.72145  | 2.34E-06 | 2.40E-05   | AMITRIPTYLINE HYDROCHLORIDE              |
| 6.505151 | -0.29931 | -0.06034884  | -6.034884021 | -1.65415  | 0.098097 | 0.242286   | CANDESARTAN CILEXTEL                     |
| 6.503791 | -0.29665 | -0.060362234 | -6.036223407 | -1.65452  | 0.098022 | 0.242216   | ISOSORBIDE MONONITRATE                   |
| 6.499687 | -0.29285 | -0.06036902  | -6.036901978 | -1.14193  | 0.253485 | 0.453474</ |                                          |

|          |          |              |              |          |          |          |                                                                                               |
|----------|----------|--------------|--------------|----------|----------|----------|-----------------------------------------------------------------------------------------------|
| 6.482874 | -0.2588  | -0.061415488 | -6.141548824 | -1.16172 | 0.245349 | 0.443937 | ISOETHARINE MESYLATE                                                                          |
| 6.534026 | -0.43792 | -0.06144499  | -6.144499885 | -1.03354 | 0.301352 | 0.505379 | Atosiban Acetate                                                                              |
| 6.528917 | -0.42724 | -0.061506796 | -6.150679593 | -1.36298 | 0.17289  | 0.35474  | Deracil                                                                                       |
| 6.509203 | -0.32189 | -0.061543009 | -6.154300887 | -2.36493 | 0.018033 | 0.068647 | AFALANINE                                                                                     |
| 6.471292 | -0.29803 | -0.061549533 | -6.154953288 | -4.82238 | 1.42E-06 | 1.51E-05 | DIMENHYDRINATE                                                                                |
| 6.495844 | -0.28051 | -0.061560673 | -6.156067279 | -1.68737 | 0.091532 | 0.230746 | PIPOBROMAN                                                                                    |
| 6.495544 | -0.28051 | -0.061560673 | -6.156067279 | -1.688   | 0.091411 | 0.230555 | AZLOCCILIN SODIUM                                                                             |
| 6.478566 | -0.24336 | -0.061661424 | -6.166142351 | -1.34602 | 0.178295 | 0.361679 | Procuretinus                                                                                  |
| 6.49276  | -0.28859 | -0.061745693 | -6.174569274 | -2.37272 | 0.017658 | 0.067768 | PHENOLSULFONPHTHALEIN                                                                         |
| 6.439333 | -0.23447 | -0.061910644 | -6.191064423 | -1.37193 | 0.170086 | 0.352147 | Trapidil                                                                                      |
| 6.5302   | -0.43    | -0.062090172 | -6.209017156 | -1.37591 | 0.168851 | 0.350528 | Asiatic acid                                                                                  |
| 6.475671 | -0.30736 | -0.062368746 | -6.236874566 | -4.88657 | 1.03E-06 | 1.11E-05 | ISOPROPAMIDE IODIDE                                                                           |
| 6.465383 | -0.28544 | -0.062430848 | -6.243084816 | -4.89143 | 1.00E-06 | 1.09E-05 | DANTHRON                                                                                      |
| 6.498311 | -0.29983 | -0.062435692 | -6.243569207 | -2.39924 | 0.016429 | 0.064332 | ERDOSTEINE                                                                                    |
| 6.525045 | -0.41891 | -0.062457113 | -6.24571297  | -1.38404 | 0.166347 | 0.345937 | Loganin                                                                                       |
| 6.498311 | -0.28592 | -0.062513639 | -6.251363942 | -1.71349 | 0.086622 | 0.222086 | RIBOFLAVIN                                                                                    |
| 6.495544 | -0.2831  | -0.06269087  | -6.269087031 | -1.33699 | 0.181227 | 0.365086 | TRAMIPROSATE                                                                                  |
| 6.456366 | -0.19948 | -0.062699747 | -6.269974651 | -1.36868 | 0.171098 | 0.352986 | Bazedoxifene Acetate                                                                          |
| 6.506050 | -0.29912 | -0.062729841 | -6.272984142 | -1.36934 | 0.170893 | 0.35281  | Gabexate Mesylate                                                                             |
| 6.472756 | -0.30115 | -0.062814771 | -6.281477056 | -4.92151 | 8.69E-07 | 8.52E-06 | NORETHYNDREL                                                                                  |
| 6.502427 | -0.29707 | -0.062818477 | -6.281847664 | -1.33971 | 0.18034  | 0.364233 | METHACYCLINE HYDROCHLORIDE                                                                    |
| 6.487138 | -0.3318  | -0.063002413 | -6.300241286 | -4.93621 | 7.97E-07 | 8.69E-06 | KETOCONAZOLE                                                                                  |
| 6.488851 | -0.28006 | -0.063223894 | -6.322389368 | -2.2953  | 0.015119 | 0.060146 | TIOGLUANINE                                                                                   |
| 6.488551 | -0.33481 | -0.063305737 | -6.330573667 | -4.95998 | 7.05E-07 | 7.90E-06 | INDOMETHACIN                                                                                  |
| 6.49276  | -0.27745 | -0.063365667 | -6.336566667 | -1.35138 | 0.176574 | 0.359754 | ANISINDIONE                                                                                   |
| 6.507856 | -0.30939 | -0.063369578 | -6.33695782  | -1.19868 | 0.230651 | 0.427719 | PANTOTHENIC ACID(d) Na salt                                                                   |
| 6.510545 | -0.38742 | -0.063439792 | -6.343979249 | -1.06709 | 0.28593  | 0.4908   | CLONIXIN                                                                                      |
| 6.488551 | -0.34012 | -0.063779926 | -6.377992615 | -1.07281 | 0.283355 | 0.488806 | Pilocarpine HCl                                                                               |
| 6.465383 | -0.29053 | -0.063848263 | -6.384826274 | -1.41486 | 0.157108 | 0.333132 | Sophoricoside                                                                                 |
| 6.499687 | -0.29151 | -0.063925295 | -6.392529457 | -1.36331 | 0.172784 | 0.35474  | SURAMIN HEXASODIUM                                                                            |
| 6.522444 | -0.41331 | -0.063930176 | -6.393017621 | -1.41668 | 0.156577 | 0.332782 | Blonanserin                                                                                   |
| 6.52763  | -0.3592  | -0.064030524 | -6.403052391 | -2.46052 | 0.013874 | 0.056108 | CORTISONE                                                                                     |
| 6.494155 | -0.28028 | -0.064100816 | -6.410081605 | -1.36706 | 0.171608 | 0.353432 | RETINOL                                                                                       |
| 6.518514 | -0.40486 | -0.064164794 | -6.416479372 | -1.42188 | 0.155062 | 0.331327 | Lacosamide                                                                                    |
| 6.499687 | -0.28557 | -0.064420896 | -6.442089631 | -1.40626 | 0.159648 | 0.33664  | Vorapaxar                                                                                     |
| 6.509203 | -0.32189 | -0.064583565 | -6.458356509 | -2.48184 | 0.01307  | 0.053451 | LEVOMENTHOL                                                                                   |
| 6.478566 | -0.31353 | -0.064586258 | -6.458625826 | -5.06109 | 4.17E-07 | 4.77E-06 | ASPIRIN                                                                                       |
| 6.472756 | -0.23832 | -0.064625474 | -6.462547198 | -1.22246 | 0.221534 | 0.417159 | REPAGLININ                                                                                    |
| 6.502427 | -0.28398 | -0.064666594 | -6.46665837  | -1.7725  | 0.076311 | 0.202757 | RISEDRONATE SODIUM                                                                            |
| 6.498311 | -0.28592 | -0.064672224 | -6.467222391 | -1.77266 | 0.076286 | 0.202757 | MEXILETINE HYDROCHLORIDE                                                                      |
| 6.523746 | -0.35134 | -0.064736537 | -6.473653733 | -2.48765 | 0.012859 | 0.052839 | PERINDOPRILAT                                                                                 |
| 6.416641 | -0.12053 | -0.064761829 | -6.47618286  | -1.4137  | 0.157451 | 0.33367  | Luliconazole                                                                                  |
| 6.517196 | -0.40172 | -0.064808588 | -6.480858804 | -1.09133 | 0.275129 | 0.478136 | DROXYDOPA                                                                                     |
| 6.475671 | -0.30736 | -0.064902383 | -6.490238265 | -5.08508 | 3.67E-07 | 4.26E-06 | FLURBIPROFEN                                                                                  |
| 6.5302   | -0.35464 | -0.064945065 | -6.494506485 | -1.22849 | 0.219265 | 0.414716 | PROPIOLACTONE                                                                                 |
| 6.426511 | -0.14015 | -0.064955713 | -6.495571293 | -1.41793 | 0.156211 | 0.332391 | Lopinavir                                                                                     |
| 6.515874 | -0.32563 | -0.065034367 | -6.503436744 | -1.23017 | 0.218632 | 0.413824 | FIPRONIL                                                                                      |
| 6.487138 | -0.3318  | -0.065127723 | -6.512772342 | -5.10273 | 3.35E-07 | 3.90E-06 | EPHEDRINE (1R,2S) HYDROCHLORIDE                                                               |
| 6.447158 | -0.18492 | -0.065242093 | -6.52420931  | -1.3914  | 0.164105 | 0.342807 | SULFAGUINOXALINE SODIUM                                                                       |
| 6.526339 | -0.34682 | -0.065405093 | -6.540509261 | -1.23719 | 0.216018 | 0.411005 | PELARGONIC ACID                                                                               |
| 6.489958 | -0.33781 | -0.065413706 | -6.54137062  | -5.12514 | 2.97E-07 | 3.47E-06 | DESOSY/CORTICOSTERONE ACETATE                                                                 |
| 6.50515  | -0.37582 | -0.065498305 | -6.549830512 | -1.10172 | 0.270584 | 0.473153 | ATROPINE                                                                                      |
| 6.506050 | -0.30196 | -0.065533484 | -6.55334839  | -1.79626 | 0.072453 | 0.195241 | OXETHAZINE                                                                                    |
| 6.50515  | -0.31368 | -0.065684192 | -6.568419161 | -2.52407 | 0.011601 | 0.048684 | PROXYPHYLLINE                                                                                 |
| 6.523746 | -0.33338 | -0.065723023 | -6.572302298 | -1.43468 | 0.151378 | 0.324971 | Enzalutamide (MDV3100)                                                                        |
| 6.487138 | -0.26605 | -0.065742492 | -6.574249206 | -1.40207 | 0.160895 | 0.337893 | CAPECITABINE                                                                                  |
| 6.477121 | -0.25692 | -0.065817177 | -6.581717732 | -2.52918 | 0.011433 | 0.048189 | PIPERONYL BUTOXIDE                                                                            |
| 6.531479 | -0.43275 | -0.065874221 | -6.58742097  | -1.45976 | 0.144356 | 0.314379 | Sodium [[2,3-dihydro-1,5-dimethyl-3-oxo-2-phenyl-1H-pyrazol-4-yl)methylamino]methanesulfonate |
| 6.507856 | -0.30808 | -0.065970526 | -6.59705265  | -5.10693 | 1.406983 | 0.159448 | KOJIC ACID                                                                                    |
| 6.489958 | -0.33781 | -0.065972247 | -6.597224697 | -5.1689  | 2.35E-07 | 2.77E-06 | EUGENOL                                                                                       |
| 6.49276  | -0.28859 | -0.066064832 | -6.606483166 | -2.53869 | 0.011127 | 0.047159 | CYROMAZINE                                                                                    |
| 6.475671 | -0.30736 | -0.066131334 | -6.613133395 | -5.18136 | 2.20E-07 | 2.61E-06 | METHYLDOPA                                                                                    |
| 6.499687 | -0.28557 | -0.066291584 | -6.629158357 | -1.44709 | 0.147871 | 0.319587 | Alprostadil                                                                                   |
| 6.507856 | -0.30939 | -0.066415446 | -6.641544566 | -1.2563  | 0.209008 | 0.401923 | DEXPANTHENOL                                                                                  |
| 6.436163 | -0.15933 | -0.066561993 | -6.656199264 | -1.45299 | 0.146225 | 0.316966 | Vandetanib (ZD6474)                                                                           |
| 6.494155 | -0.28028 | -0.066692743 | -6.669274299 | -1.42169 | 0.155115 | 0.331327 | CARBETAPENTANE CITRATE                                                                        |
| 6.52763  | -0.42416 | -0.066723639 | -6.672363911 | -1.22233 | 0.261722 | 0.442235 | Triptorelin Acetate                                                                           |
| 6.489958 | -0.26623 | -0.066757811 | -6.675781107 | -1.45727 | 0.145042 | 0.314536 | Semagacestat (LY450139)                                                                       |
| 6.510545 | -0.30714 | -0.066847751 | -6.684775065 | -1.45923 | 0.144501 | 0.314519 | Dextrose                                                                                      |
| 6.537819 | -0.4464  | -0.06702445  | -6.702445047 | -1.48525 | 0.137478 | 0.303336 | Batyl alcohol                                                                                 |
| 6.489958 | -0.27177 | -0.067149462 | -6.71494616  | -1.43207 | 0.152123 | 0.326159 | LOMEFLOXACIN HYDROCHLORIDE                                                                    |
| 6.536558 | -0.36751 | -0.067215575 | -6.721557498 | -1.27143 | 0.203574 | 0.394929 | TRICLOSAN                                                                                     |
| 6.488551 | -0.33481 | -0.067233871 | -6.723387054 | -5.26775 | 1.38E-07 | 1.67E-06 | HALOPERIDOL                                                                                   |
| 6.518514 | -0.34074 | -0.067320356 | -6.732035559 | -2.58694 | 0.009683 | 0.042015 | ACIPIMOX                                                                                      |
| 6.536558 | -0.44369 | -0.067322569 | -6.732256877 | -1.49185 | 0.135737 | 0.300855 | Piceatannol                                                                                   |
| 6.501059 | -0.2913  | -0.067403357 | -6.740335677 | -1.84752 | 0.064672 | 0.18035  | NAFRONYL OXALATE                                                                              |
| 6.513218 | -0.32025 | -0.0674231   | -6.742309981 | -1.27536 | 0.202182 | 0.393303 | D-LACTITOL MONOHYDRATE                                                                        |
| 6.519828 | -0.33363 | -0.067457637 | -6.745763707 | -1.27601 | 0.201951 | 0.393003 | METFORMIN HYDROCHLORIDE                                                                       |
| 6.534026 | -0.36238 | -0.067459303 | -6.745930265 | -1.27604 | 0.20194  | 0.393003 | DYDROGESTERONE                                                                                |
| 6.49693  | -0.28009 | -0.067462994 | -6.746299447 | -1.47266 | 0.140842 | 0.309092 | Eltacridar (GF120918)                                                                         |
| 6.528917 | -0.42724 | -0.067495305 | -6.749532513 | -1.49568 | 0.134737 | 0.299579 | Scopolamine                                                                                   |
| 6.49693  | -0.28322 | -0.067601136 | -6.760113616 | -1.85294 | 0.063891 | 0.178463 | GLUCONOLACTONE                                                                                |
| 6.49693  | -0.28591 | -0.067737588 | -6.773758799 | -1.44462 | 0.148566 | 0.320545 | ALRESTATIN                                                                                    |
| 6.482874 | -0.32271 | -0.067766388 | -6.77663882  | -5.30947 | 1.10E-07 | 1.34E-06 | CARBINOXAMINE MALEATE                                                                         |
| 6.49276  | -0.2718  | -0.067801904 | -6.780190445 | -1.48006 | 0.138857 | 0.305738 | Lonidamine                                                                                    |
| 6.453318 | -0.26456 | -0.067826554 | -6.782655433 | -1.50302 | 0.132833 | 0.297379 | Carbendazim                                                                                   |
| 6.514548 | -0.32294 | -0.06787324  | -6.787324019 | -1.28387 | 0.199186 | 0.390441 | OXTRIPHYLLINE                                                                                 |
| 6.494155 | -0.27457 | -0.068128973 | -6.812897256 | -1.4872  | 0.136962 | 0.302504 | Rilpivirine                                                                                   |
| 6.50515  | -0.29931 | -0.06823123  | -6.823123034 | -1.87021 | 0.061455 | 0.173173 | CYSTEAMINE HYDROCHLORIDE                                                                      |
| 6.469822 | -0.22622 | -0.068276423 | -6.82764229  | -1.49042 | 0.136114 | 0.301361 | Bosentan                                                                                      |
| 6.506050 | -0.30534 | -0.068359176 | -6.835917649 | -1.45787 | 0.144876 | 0.31486  | FLUNISOLIDE                                                                                   |
| 6.519828 | -0.32559 | -0.06836141  | -6.836140985 | -1.49227 | 0.135627 | 0.300741 | Sofosbuvir (PSI-7977, GS-7977)                                                                |
| 6.501059 | -0.29563 | -0.068479671 | -6.847967125 | -1.29534 | 0.195201 | 0.385286 | PHENOTHIAZINE                                                                                 |
| 6.537819 | -0.44607 | -0.068516858 | -6.851685773 | -1.52449 | 0.249119 | 0.449116 | BENZYL NICOTINATE                                                                             |
| 6.536558 | -0.44369 | -0.068576614 | -6.857661369 | -1.52186 | 0.230561 | 0.128044 | Methandienolone                                                                               |
| 6.503791 | -0.29893 | -0.068732722 | -6.873272153 | -1.49268 | 0.312349 | 0.426892 | ERYTHROMYCIN ESTOLATE                                                                         |
| 6.4843   | -0.32575 | -0.06874973  | -6.874973004 | -5.38651 | 7.18E-08 | 8.93E-07 | CRESOL                                                                                        |
| 6.463893 | -0.21859 | -0.068993814 | -6.899381358 | -1.89111 | 0.05861  | 0.167737 | NALED                                                                                         |
| 6.525045 | -0.3442  | -0.069174336 | -6.917433568 | -1.30848 | 0.190709 | 0.378755 | TRICHLORFON                                                                                   |
| 6.4843   | -0.32575 | -0.069279892 | -6.92798922  | -5.42805 | 5.70E-08 | 7.11E-07 | DISULFIRAM                                                                                    |
| 6.522444 | -0.41301 | -0.069309504 | -6.930950423 | -1.16582 | 0.243685 | 0.442593 | Acrivastine                                                                                   |
| 6.509203 | -0.31212 | -0.069315496 | -6.93154965  | -1.31116 | 0.189805 | 0.377399 | BENAZEPRIL HYDROCHLORIDE                                                                      |
| 6.480007 | -0.32199 | -0.06933288  | -6.933288007 | -1.5364  | 0.12444  | 0.284561 | Doripenem                                                                                     |
| 6.509203 | -0.30448 | -0.069335921 | -6.933592071 | -1.51355 | 0.130141 | 0.294441 | Lafutidine                                                                                    |
| 6.539076 | -0.38238 | -0.06933702  | -6.933701777 | -2.66508 | 0.007697 | 0.03466  | PAROXYPROPIONE                                                                                |
| 6.525045 | -0.3442  | -0.0694131   | -6.941309993 | -1.313   | 0.189183 | 0.37655  | FILUMAZENIL                                                                                   |
| 6.506050 | -0.30196 | -0.069514722 | -6.95147223  | -1.90539 | 0.05673  | 0.164099 | FEXOFENADINE HYDROCHLORIDE                                                                    |
| 6.522444 | -0.41301 | -0.069568135 | -6.95681349  | -1.17017 | 0.241931 | 0.440656 | Tolcapone                                                                                     |
| 6.511883 | -0.32731 | -0.069692228 | -6.969222752 | -2.67797 | 0.007407 | 0.03305  | ORNITHINE HYDROCHLORIDE                                                                       |
| 6.517196 | -0.32036 | -0.069722744 | -6.972274366 | -1.52199 | 0.128011 | 0.280561 | LCZ696                                                                                        |
| 6.509203 | -0.31082 | -0.069867444 | -6.986744351 | -1.49004 | 0.136214 | 0.30139  | HYDROXYZYNE HYDROCHLORIDE                                                                     |
| 6.517196 | -0.33807 | -0.069930068 | -6.993006817 | -2.68723 | 0.0072   |          |                                                                                               |

|          |          |              |              |          |          |          |                                    |
|----------|----------|--------------|--------------|----------|----------|----------|------------------------------------|
| 6.494155 | -0.27457 | -0.071328736 | -7.132873592 | -1.55705 | 0.119459 | 0.277432 | Zibotentan (ZD4054)                |
| 6.451786 | -0.1949  | -0.071458803 | -7.145880264 | -1.95868 | 0.050151 | 0.150511 | PROPOFOL                           |
| 6.515874 | -0.32029 | -0.071808904 | -7.180890398 | -1.96827 | 0.049037 | 0.148385 | ISOXICAM                           |
| 6.4843   | -0.25851 | -0.07184211  | -7.184210977 | -1.96918 | 0.048932 | 0.148332 | LOXAPINE SUCCINATE                 |
| 6.503791 | -0.37317 | -0.071847607 | -7.184760726 | -1.59213 | 0.111356 | 0.265183 | Nifedipine                         |
| 6.535294 | -0.44096 | -0.072053606 | -7.205360622 | -1.59669 | 0.110334 | 0.263239 | Androgapholide                     |
| 6.442674 | -0.32271 | -0.072085988 | -7.208598816 | -6.64779 | 1.63E-08 | 2.20E-07 | EUCALYPTOL                         |
| 6.534026 | -0.37215 | -0.072133156 | -7.213319198 | -2.77142 | 0.005585 | 0.026531 | EXALAMIDE                          |
| 6.488551 | -0.33481 | -0.072117816 | -7.211781591 | -5.6504  | 1.60E-08 | 2.17E-07 | NAFCILLIN SODIUM                   |
| 6.501059 | -0.29429 | -0.072199292 | -7.219929185 | -1.53977 | 0.123617 | 0.284074 | TUBOCURARINE CHLORIDE PENTAHYDRATE |
| 6.472756 | -0.30615 | -0.072201324 | -7.220132405 | -1.21447 | 0.22457  | 0.420094 | Bisphenem                          |
| 6.491362 | -0.3408  | -0.072218081 | -7.221808063 | -6.58262 | 1.53E-08 | 2.08E-07 | POLYMYXIN B SULFATE                |
| 6.534026 | -0.37215 | -0.072296261 | -7.229626071 | -2.77815 | 0.005467 | 0.026381 | TOLPERISONE HYDROCHLORIDE          |
| 6.5302   | -0.42969 | -0.072342404 | -7.234240382 | -1.21684 | 0.223665 | 0.419014 | BENZTROPINE MESYLATE               |
| 6.495544 | -0.28446 | -0.072485099 | -7.248509935 | -1.37111 | 0.170341 | 0.352239 | CEFONICID SODIUM                   |
| 6.501059 | -0.29429 | -0.072487541 | -7.248754086 | -1.54592 | 0.122125 | 0.282038 | XYLAZINE                           |
| 6.4843   | -0.27146 | -0.072601707 | -7.260170714 | -2.78989 | 0.005273 | 0.025516 | CHLOROPYRAMINE HYDROCHLORIDE       |
| 6.519828 | -0.3434  | -0.072678832 | -7.267883179 | -2.79285 | 0.005225 | 0.025307 | REBAMIPIDE                         |
| 6.522444 | -0.41331 | -0.07268644  | -7.268643986 | -1.61072 | 0.107242 | 0.256698 | Chondroitine sulfate               |
| 6.494155 | -0.35217 | -0.072743619 | -7.274361883 | -1.22359 | 0.221108 | 0.416969 | Meptazinol HCl                     |
| 6.498311 | -0.36111 | -0.072817122 | -7.28171225  | -1.22482 | 0.220641 | 0.416397 | Palonosetron HCl                   |
| 6.534026 | -0.37215 | -0.072943693 | -7.294369296 | -2.80303 | 0.005062 | 0.024615 | TOLFENAMIC ACID                    |
| 6.501059 | -0.29429 | -0.072911435 | -7.321143481 | -1.56157 | 0.118359 | 0.275901 | KETOOTIFEN FLUMARATE               |
| 6.503791 | -0.31093 | -0.073283847 | -7.328384706 | -2.8161  | 0.004861 | 0.023839 | CAPRYLIDENE                        |
| 6.4843   | -0.32575 | -0.073303994 | -7.330399419 | -5.74334 | 9.28E-09 | 1.30E-07 | ACETYLCYSTEINE                     |
| 6.515874 | -0.32029 | -0.073478183 | -7.347818298 | -2.01403 | 0.044007 | 0.137303 | EDOXUDINE                          |
| 6.534026 | -0.43792 | -0.073652175 | -7.365217545 | -1.23887 | 0.215393 | 0.410577 | BEXAROTENE                         |
| 6.491362 | -0.3408  | -0.07365371  | -7.365370992 | -5.77074 | 7.89E-09 | 1.11E-07 | MECLOFENAMATE SODIUM               |
| 6.519828 | -0.32559 | -0.073791699 | -7.379169913 | -1.61081 | 0.107221 | 0.256698 | Rasagiline Mesylate                |
| 6.546543 | -0.3975  | -0.073851585 | -7.385158516 | -2.83792 | 0.004541 | 0.022616 | DIOSMIN                            |
| 6.52763  | -0.3592  | -0.074034015 | -7.403401519 | -2.84493 | 0.004442 | 0.022232 | SUCRALOSE                          |
| 6.506505 | -0.30196 | -0.074124117 | -7.412411663 | -2.03173 | 0.042181 | 0.132902 | SUVOREXANT                         |
| 6.481443 | -0.32483 | -0.07416666  | -7.416665975 | -1.24752 | 0.212206 | 0.406926 | Tiludronate Disodium               |
| 6.489958 | -0.33781 | -0.074225821 | -7.422582105 | -5.81556 | 6.04E-09 | 8.57E-08 | DIFLUNISAL                         |
| 6.50515  | -0.29642 | -0.074246229 | -7.424622873 | -1.62073 | 0.105075 | 0.252978 | Etavirenz                          |
| 6.501059 | -0.28829 | -0.074285419 | -7.428541941 | -1.62159 | 0.104891 | 0.252768 | Licoferone                         |
| 6.481443 | -0.25292 | -0.074325376 | -7.43253761  | -2.03724 | 0.041626 | 0.131557 | ANILOPIDINE BESYLATE               |
| 6.517196 | -0.32036 | -0.074734304 | -7.473430435 | -1.61349 | 0.102806 | 0.249497 | TAK-700 (Orteronel)                |
| 6.507856 | -0.30808 | -0.074753272 | -7.475327228 | -1.59424 | 0.110883 | 0.284179 | TRANLYCYPROMINE SULFATE            |
| 6.488551 | -0.28891 | -0.074781926 | -7.478192589 | -1.59485 | 0.110746 | 0.263976 | PYRIMETHAMINE                      |
| 6.501059 | -0.29429 | -0.074792298 | -7.479229846 | -1.59507 | 0.110697 | 0.263976 | URSODIOL                           |
| 6.515874 | -0.32563 | -0.074911549 | -7.49115488  | -1.41701 | 0.15648  | 0.332716 | TROCLOSENE SODIUM                  |
| 6.506505 | -0.29912 | -0.074918314 | -7.491831411 | -1.63541 | 0.101964 | 0.248243 | Olmutinib (HM61713, BI 1482694)    |
| 6.475671 | -0.24422 | -0.075086823 | -7.508682309 | -1.42032 | 0.155513 | 0.331762 | DENATONIUM BENZOATE                |
| 6.494155 | -0.28165 | -0.075094191 | -7.509419139 | -1.42046 | 0.155473 | 0.331762 | TEICOPLANIN [A(2-1) shown]         |
| 6.517196 | -0.40172 | -0.075095894 | -7.509589421 | -1.26315 | 0.206534 | 0.398437 | Lithocholic acid                   |
| 6.515874 | -0.32563 | -0.075143222 | -7.514322249 | -1.42139 | 0.155203 | 0.331376 | CAPOBENIC ACID                     |
| 6.485721 | -0.32878 | -0.075145494 | -7.514549365 | -5.88762 | 3.92E-09 | 5.62E-08 | NORETHIDRONE ACETATE               |
| 6.482874 | -0.32271 | -0.075156392 | -7.515639186 | -5.88847 | 3.90E-09 | 5.61E-08 | PHENACEMIDE                        |
| 6.49693  | -0.35266 | -0.075364186 | -7.536418552 | -5.90475 | 3.53E-09 | 5.09E-08 | DEXCHLORPHENIRAMINE MALEATE        |
| 6.485721 | -0.26129 | -0.07544653  | -7.544465324 | -2.06793 | 0.038647 | 0.124284 | OXILAN                             |
| 6.515874 | -0.39918 | -0.075540919 | -7.554091978 | -1.67397 | 0.094136 | 0.234882 | Carbassilate Calcium               |
| 6.518514 | -0.32545 | -0.075559477 | -7.555947728 | -2.07107 | 0.038352 | 0.12342  | VORINOSTAT                         |
| 6.471292 | -0.30324 | -0.075559628 | -7.555962809 | -1.67439 | 0.094055 | 0.234793 | Spiculisporic Acid                 |
| 6.506505 | -0.37901 | -0.075564779 | -7.556477895 | -1.6745  | 0.094032 | 0.234793 | Fosfomycin Calcium                 |
| 6.501059 | -0.29429 | -0.075929065 | -7.592906531 | -1.61931 | 0.10538  | 0.253307 | BETAHISTINE DIHYDROCHLORIDE        |
| 6.471292 | -0.30324 | -0.076019706 | -7.601970568 | -1.68458 | 0.09207  | 0.23143  | Hydroxy Camptothecin               |
| 6.534026 | -0.35381 | -0.076130255 | -7.613025466 | -1.66186 | 0.096541 | 0.239249 | Dienogest                          |
| 6.482874 | -0.32791 | -0.076274851 | -7.627485056 | -1.28299 | 0.199497 | 0.390752 | Tiopronin                          |
| 6.49693  | -0.28727 | -0.076289548 | -7.628954792 | -1.44307 | 0.148999 | 0.321176 | METOLAZONE                         |
| 6.517196 | -0.33807 | -0.076291663 | -7.629166289 | -2.93168 | 0.003371 | 0.017631 | XYLOSE                             |
| 6.509203 | -0.30448 | -0.076379291 | -7.637929143 | -1.6673  | 0.095455 | 0.237594 | Agomelatine                        |
| 6.526339 | -0.34682 | -0.076430981 | -7.643098097 | -1.44575 | 0.148247 | 0.320264 | GUANFACINE HYDROCHLORIDE           |
| 6.502427 | -0.29707 | -0.076733934 | -7.673393391 | -1.63648 | 0.101739 | 0.247933 | ROXARSONE                          |
| 6.440445 | -0.24461 | -0.076808082 | -7.680808178 | -1.70189 | 0.098776 | 0.225653 | Paenon                             |
| 6.481443 | -0.27657 | -0.076959175 | -7.695917571 | -1.45396 | 0.145985 | 0.318579 | HYDROCORTISONE VALERATE            |
| 6.495544 | -0.28561 | -0.077036597 | -7.703659655 | -2.11156 | 0.034724 | 0.113602 | CANDICIDIN                         |
| 6.489958 | -0.28292 | -0.077070552 | -7.707055198 | -2.96162 | 0.00306  | 0.016187 | CHLORAZANIL HYDROCHLORIDE          |
| 6.509203 | -0.30723 | -0.077115607 | -7.711560885 | -2.11373 | 0.034539 | 0.113067 | QUIPAZINE MALEATE                  |
| 6.50515  | -0.3761  | -0.077121925 | -7.712192529 | -1.70901 | 0.08745  | 0.22376  | Fosphenytoin Na Pentahydrate       |
| 6.462398 | -0.22711 | -0.077220409 | -7.722040911 | -2.96737 | 0.003004 | 0.015936 | GATIFLOXACIN                       |
| 6.488551 | -0.33481 | -0.077451397 | -7.745139723 | -6.06829 | 1.29E-09 | 1.99E-08 | APOMORPHINE HYDROCHLORIDE          |
| 6.517196 | -0.32287 | -0.077583647 | -7.758364661 | -2.12656 | 0.033457 | 0.110444 | BERGENIN                           |
| 6.535294 | -0.35633 | -0.077823994 | -7.782399416 | -1.69883 | 0.08935  | 0.226584 | Pazopanib                          |
| 6.539076 | -0.37261 | -0.077988397 | -7.798839651 | -1.47521 | 0.140156 | 0.307851 | DIATRIZOIC ACID                    |
| 6.531479 | -0.43275 | -0.078006763 | -7.800676262 | -1.72861 | 0.083878 | 0.216829 | Ifenprodil Tartrate                |
| 6.52763  | -0.3592  | -0.07807408  | -7.807407962 | -3.00018 | 0.02698  | 0.014557 | RONNEL                             |
| 6.491362 | -0.3408  | -0.078123471 | -7.812347131 | -6.12094 | 9.30E-10 | 1.47E-08 | CARBAMAZEPINE                      |
| 6.468947 | -0.22329 | -0.078232008 | -7.823200798 | -1.70774 | 0.087684 | 0.223912 | Nystatin (Fungicide)               |
| 6.4843   | -0.27146 | -0.07826595  | -7.82659487  | -3.00834 | 0.002627 | 0.014232 | CARBIMAZOLE                        |
| 6.481443 | -0.26567 | -0.078472959 | -7.847295915 | -3.01551 | 0.002565 | 0.013974 | CHINIFON                           |
| 6.513218 | -0.38317 | -0.078511421 | -7.851142124 | -1.32061 | 0.186633 | 0.372538 | Clindamycin Phosphate              |
| 6.49693  | -0.28591 | -0.078612607 | -7.861260664 | -1.67654 | 0.093632 | 0.234094 | BUDESONIDE                         |
| 6.510545 | -0.31354 | -0.078661563 | -7.866156269 | -1.67759 | 0.093427 | 0.233797 | ZALCITABINE                        |
| 6.49693  | -0.35266 | -0.078772421 | -7.877242145 | -6.17179 | 6.75E-10 | 1.08E-08 | CHLOROXYLENOL                      |
| 6.511883 | -0.3098  | -0.078796501 | -7.879650102 | -1.72006 | 0.085421 | 0.219778 | Fostamatinib (R788)                |
| 6.511883 | -0.39059 | -0.079197762 | -7.919776179 | -1.75501 | 0.079258 | 0.208961 | Sulfogalcin                        |
| 6.5302   | -0.3644  | -0.079229841 | -7.9229841   | -3.04459 | 0.00233  | 0.012814 | THIODIOLYCOL                       |
| 6.480007 | -0.253   | -0.079276683 | -7.927668278 | -1.49958 | 0.133724 | 0.298459 | DIMETHYLSULFONE                    |
| 6.536558 | -0.36751 | -0.079303531 | -7.930353097 | -1.50009 | 0.133592 | 0.298295 | SULISOBENZONE                      |
| 6.522444 | -0.3487  | -0.07951325  | -7.95132543  | -3.05694 | 0.002236 | 0.012377 | INOSINE                            |
| 6.49693  | -0.29703 | -0.079603929 | -7.96039288  | -3.05897 | 0.002221 | 0.012332 | SECURININE                         |
| 6.517196 | -0.32287 | -0.07968865  | -7.968864985 | -2.18425 | 0.028944 | 0.098886 | TAURINE                            |
| 6.540329 | -0.45147 | -0.079897835 | -7.989783478 | -1.34393 | 0.178972 | 0.362476 | BENDAMUSTINE HYDROCHLORIDE         |
| 6.523746 | -0.41581 | -0.07993911  | -7.99391108  | -1.44485 | 0.178748 | 0.362207 | FELBINAC                           |
| 6.4843   | -0.25499 | -0.07970801  | -7.97080127  | -1.7457  | 0.080864 | 0.211667 | Cardulafinil (PRT062070, PRT2070)  |
| 6.489958 | -0.33781 | -0.08010876  | -8.010876022 | -6.27649 | 3.46E-10 | 5.65E-09 | HYDROXYPROGESTERONE CAPROATE       |
| 6.468958 | -0.28349 | -0.08022604  | -8.022603969 | -1.34945 | 0.177194 | 0.360155 | Ramelteon                          |
| 6.440445 | -0.17499 | -0.080328104 | -8.032810387 | -1.7535  | 0.079517 | 0.209319 | Embelin                            |
| 6.523746 | -0.33338 | -0.08037282  | -8.037282028 | -1.75447 | 0.079349 | 0.209094 | VX-809 (Lumacaftor)                |
| 6.513218 | -0.33002 | -0.080426303 | -8.042630272 | -3.09057 | 0.001998 | 0.011327 | BITOSCANATE                        |
| 6.480007 | -0.32175 | -0.080589388 | -8.058938843 | -1.35556 | 0.17524  | 0.358511 | QUININE HYDROCHLORIDE              |
| 6.429752 | -0.21385 | -0.080841508 | -8.08415079  | -1.79143 | 0.073224 | 0.196858 | Bupropion                          |
| 6.489958 | -0.26958 | -0.08104712  | -8.101471161 | -2.2206  | 0.026378 | 0.091937 | AZILSARTAN MEDOXOMIL               |
| 6.478566 | -0.25985 | -0.08120755  | -8.120755046 | -3.12059 | 0.001805 | 0.010395 | PRASTERONE                         |
| 6.445604 | -0.24796 | -0.081320756 | -8.13207563  | -1.80205 | 0.071537 | 0.193599 | AN-2690                            |
| 6.525045 | -0.4186  | -0.081366392 | -8.136639195 | -1.36863 | 0.171116 | 0.352986 | Cysteine HCl                       |
| 6.495544 | -0.28051 | -0.081423265 | -8.142326541 | -2.2318  | 0.025628 | 0.089571 | CEFTRIAXONE SODIUM TRIHYDRATE      |
| 6.489551 | -0.2703  | -0.081617949 | -8.161794977 | -1.54385 | 0.122624 | 0.252681 | FELBINAC                           |
| 6.498311 | -0.28871 | -0.081617835 | -8.161783485 | -1.74064 | 0.081747 | 0.213032 | SALICYLAMIDE                       |
| 6.459392 | -0.27741 | -0.08164779  | -8.164778995 | -1.37336 | 0.16964  | 0.3515   | Cinepazide maleate                 |
| 6.50515  | -0.30391 | -0.08183355  | -8.183354953 | -1.54794 | 0.12     |          |                                    |



|          |          |              |              |          |          |           |                                  |
|----------|----------|--------------|--------------|----------|----------|-----------|----------------------------------|
| 6.501059 | -0.29563 | -0.08395652  | -8.395651967 | -1.5881  | 0.112263 | 0.266106  | ETHANOLAMINE OLEATE              |
| 6.532754 | -0.35981 | -0.083983065 | -8.398306487 | -1.5886  | 0.11215  | 0.266083  | DILOXANIDE FUROATE               |
| 6.525045 | -0.33596 | -0.084007032 | -8.400703175 | -1.83381 | 0.066683 | 0.183854  | Obeticholic Acid                 |
| 6.502427 | -0.29101 | -0.084048793 | -8.404879326 | -1.83472 | 0.066548 | 0.183768  | Batimastat (BB-94)               |
| 6.49693  | -0.28009 | -0.084082446 | -8.408244566 | -1.83545 | 0.066439 | 0.183768  | Iniparib (BSI-201)               |
| 6.460898 | -0.20848 | -0.084342611 | -8.434261087 | -1.84113 | 0.065602 | 0.182249  | Vemurafenib (PLX4032, RG7204)    |
| 6.503791 | -0.29372 | -0.084378713 | -8.437871299 | -1.84192 | 0.065487 | 0.182027  | Inflibinib (PCI-32765)           |
| 6.514548 | -0.33596 | -0.084560978 | -8.456097818 | -3.24845 | 0.001156 | 0.007068  | OXELADIN CITRATE                 |
| 6.509203 | -0.31082 | -0.084685016 | -8.46850165  | -1.80605 | 0.070911 | 0.192811  | URACIL                           |
| 6.509203 | -0.32189 | -0.084709369 | -8.470936867 | -3.25515 | 0.001133 | 0.006941  | ADELMDLROL                       |
| 6.49693  | -0.35841 | -0.084753525 | -8.47535252  | -1.87812 | 0.060365 | 0.171061  | Azasetron hydrochloride          |
| 6.507856 | -0.38192 | -0.084758319 | -8.475831902 | -1.87823 | 0.06035  | 0.171061  | Laetrile                         |
| 6.513218 | -0.31896 | -0.08482933  | -8.482933045 | -1.80913 | 0.070431 | 0.192172  | TRIHENXYPHENIDYL HYDROCHLORIDE   |
| 6.499687 | -0.35854 | -0.084908797 | -8.498079698 | -6.65821 | 2.77E-11 | 4.81E-10  | TESTOSTERONE PROPIONATE          |
| 6.513218 | -0.31509 | -0.085021469 | -8.50214695  | -2.33043 | 0.019784 | 0.073882  | ALFUZOSIN HYDROCHLORIDE          |
| 6.431364 | -0.21732 | -0.085181398 | -8.518139756 | -1.8876  | 0.059079 | 0.168893  | Cefotetan Disodium               |
| 6.494155 | -0.27457 | -0.085183977 | -8.5183977   | -1.8595  | 0.062957 | 0.176624  | Epacadostat (INC024360)          |
| 6.517196 | -0.32036 | -0.085426531 | -8.542653066 | -1.86479 | 0.062211 | 0.174914  | Argatroban                       |
| 6.502427 | -0.2984  | -0.085556894 | -8.555689371 | -1.61837 | 0.105582 | 0.253616  | CEFPDOXIME PROXETIL              |
| 6.485721 | -0.32878 | -0.085641602 | -8.564160244 | -6.71034 | 1.94E-11 | 3.42E-10  | OXYPHENBUTAZONE                  |
| 6.475671 | -0.31286 | -0.085646899 | -8.564689932 | -1.89792 | 0.057707 | 0.168082  | Naloxegol oxalate                |
| 6.503791 | -0.31093 | -0.085698822 | -8.569882227 | -2.29318 | 0.000991 | 0.006133  | HYDROXYPROGESTERONE              |
| 6.515874 | -0.32563 | -0.085757898 | -8.575789843 | -6.2157  | 0.104886 | 0.252768  | FINASTERIDE                      |
| 6.534026 | -0.35381 | -0.085928278 | -8.59282757  | -1.87715 | 0.060497 | 0.171224  | Tamibarotene                     |
| 6.513218 | -0.31896 | -0.086022988 | -8.602298841 | -1.83458 | 0.066568 | 0.183768  | AMPROLIUM                        |
| 6.503791 | -0.29665 | -0.086182905 | -8.618290453 | -2.36226 | 0.018164 | 0.068939  | LINAGLIPTIN                      |
| 6.459392 | -0.21125 | -0.086199377 | -8.619937658 | -1.63053 | 0.10299  | 0.249673  | BUSPIRONE HYDROCHLORIDE          |
| 6.502427 | -0.2984  | -0.0862298   | -8.622980036 | -1.6311  | 0.102869 | 0.249497  | MESALAMINE                       |
| 6.507856 | -0.30808 | -0.086266773 | -8.626677266 | -1.83978 | 0.0658   | 0.182699  | ACECLIDINE                       |
| 6.468347 | -0.22939 | -0.08627832  | -8.627832016 | -1.63202 | 0.102675 | 0.249382  | BENZYDAMINE HYDROCHLORIDE        |
| 6.477121 | -0.24072 | -0.086381211 | -8.638121118 | -1.88563 | 0.059345 | 0.169028  | Erlotinib                        |
| 6.52763  | -0.34943 | -0.086404737 | -8.640473677 | -1.63441 | 0.102173 | 0.248629  | ALTRENOGEST                      |
| 6.480007 | -0.26276 | -0.086455991 | -8.645599074 | -3.32227 | 0.000893 | 0.005623  | CYTISINE                         |
| 6.506505 | -0.30666 | -0.086460608 | -8.646060784 | -1.63547 | 0.101951 | 0.248243  | SYMLOSENE                        |
| 6.487138 | -0.26063 | -0.086554169 | -8.655416861 | -1.88941 | 0.058837 | 0.168294  | Oclacitinib                      |
| 6.49693  | -0.35266 | -0.086735704 | -8.673570437 | -6.79571 | 1.08E-11 | 1.93E-10  | DIPYRIDAMOLE                     |
| 6.50515  | -0.29642 | -0.086751765 | -8.6751765   | -1.89372 | 0.05262  | 0.167116  | Cabozantinib (XL184, BMS-907351) |
| 6.525045 | -0.4186  | -0.086936361 | -8.693636361 | -1.46232 | 0.143654 | 0.1391918 | EDOXABAN TOSYLATE HYDRATE        |
| 6.499687 | -0.28557 | -0.086994504 | -8.699450439 | -1.89902 | 0.057562 | 0.165758  | Safinamide Mesylate              |
| 6.488551 | -0.26683 | -0.087514893 | -8.75148935  | -2.39877 | 0.01645  | 0.064343  | RAMELTEON                        |
| 6.49693  | -0.35266 | -0.087706116 | -8.7706116   | -6.87174 | 6.34E-12 | 1.16E-10  | DACARBAZINE                      |
| 6.49276  | -0.34378 | -0.087771233 | -8.777123283 | -6.87684 | 6.12E-12 | 1.12E-10  | DANAZOL                          |
| 6.50515  | -0.31368 | -0.087823561 | -8.782356142 | -3.37482 | 0.000739 | 0.004715  | ERYTHROMYCIN STEARATE            |
| 6.448706 | -0.25464 | -0.087891144 | -8.789114415 | -1.94765 | 0.051457 | 0.153621  | Selexipag(NS-304)                |
| 6.537819 | -0.44607 | -0.087913672 | -8.791367174 | -1.47876 | 0.139205 | 0.306156  | CYSTINE                          |
| 6.463893 | -0.28732 | -0.087939341 | -8.793934063 | -1.94872 | 0.051329 | 0.153418  | Ceftizoxim-Na                    |
| 6.485721 | -0.32878 | -0.088026052 | -8.802605239 | -6.89681 | 5.32E-12 | 9.87E-11  | ADENOSINE                        |
| 6.480007 | -0.24646 | -0.088291779 | -8.829177902 | -1.92734 | 0.053938 | 0.15849   | Bitopertin                       |
| 6.509203 | -0.31082 | -0.088419064 | -8.841906377 | -1.88568 | 0.059338 | 0.169028  | JOSAMYCIN                        |
| 6.50515  | -0.29642 | -0.088442665 | -8.844266546 | -1.93063 | 0.053529 | 0.157691  | Ulixertinib (BVD-523, VRT52271)  |
| 6.513218 | -0.31896 | -0.088458905 | -8.845890521 | -1.88652 | 0.059224 | 0.169011  | FLUMETHASONE                     |
| 6.519828 | -0.32559 | -0.088688705 | -8.86887047  | -1.936   | 0.052867 | 0.156234  | Teloprevir (VX-950)              |
| 6.489958 | -0.27177 | -0.088729485 | -8.87294847  | -1.8923  | 0.058451 | 0.167375  | SULFADIMETHOXINE                 |
| 6.50515  | -0.30259 | -0.088977875 | -8.897787843 | -1.8976  | 0.057749 | 0.166109  | CAPTOPRIL                        |
| 6.488551 | -0.33481 | -0.089296086 | -8.929608575 | -6.99631 | 2.63E-12 | 4.96E-11  | FLUOCINONIDE                     |
| 6.495544 | -0.28446 | -0.089329284 | -8.932928425 | -1.69094 | 0.090849 | 0.229589  | SITAGLIPTIN PHOSPHATE            |
| 6.509203 | -0.30723 | -0.089435545 | -8.943554516 | -2.45142 | 0.01423  | 0.057321  | CELECOXIB                        |
| 6.488551 | -0.33481 | -0.089469349 | -8.946934915 | -7.00989 | 2.39E-12 | 4.56E-11  | HYDROCHLOROTHIAZIDE              |
| 6.482874 | -0.25215 | -0.089902661 | -8.990266118 | -1.9625  | 0.049704 | 0.149609  | MEK162 (ARRY-162, ARRY-438162)   |
| 6.466868 | -0.22491 | -0.089920114 | -8.992011364 | -1.9177  | 0.05515  | 0.160344  | QUININE                          |
| 6.49276  | -0.2718  | -0.089957672 | -8.995767212 | -1.9637  | 0.049565 | 0.149277  | Nilotinib (AMN-107)              |
| 6.501059 | -0.30539 | -0.089955503 | -8.995550349 | -3.45829 | 0.000544 | 0.00355   | CHLORALOSE                       |
| 6.514548 | -0.3151  | -0.090184287 | -9.018428693 | -1.96885 | 0.048993 | 0.148342  | Serotonin HCl                    |
| 6.495544 | -0.2831  | -0.090295002 | -9.029501975 | -1.92569 | 0.054143 | 0.15877   | NEFOPAM                          |
| 6.532754 | -0.35128 | -0.090320007 | -9.03200078  | -1.97161 | 0.048654 | 0.147639  | Tazarotene                       |
| 6.457882 | -0.20249 | -0.090517466 | -9.051746572 | -1.97692 | 0.049164 | 0.146784  | Meclofenbutol                    |
| 6.509203 | -0.30449 | -0.090576065 | -9.0576065   | -1.9772  | 0.048019 | 0.146518  | Zasuciclovir (LY335979) 3HCl     |
| 6.4843   | -0.32575 | -0.090675013 | -9.067501265 | -7.10435 | 1.21E-12 | 2.35E-11  | NORGESTREL                       |
| 6.495544 | -0.34971 | -0.090688922 | -9.068892191 | -7.10544 | 1.20E-12 | 2.34E-11  | CARBOPLATIN                      |
| 6.541579 | -0.45416 | -0.090737434 | -9.073743389 | -1.52625 | 0.126947 | 0.288741  | LINACLOTIDE (1 mg/ml)            |
| 6.526339 | -0.33853 | -0.090774965 | -9.077496465 | -1.98154 | 0.04753  | 0.145761  | Rotigotine                       |
| 6.521138 | -0.34605 | -0.090884732 | -9.088473242 | -3.49246 | 0.000479 | 0.003175  | METITEPINE MESYLATE              |
| 6.494155 | -0.34675 | -0.090916537 | -9.091653747 | -7.12327 | 1.05E-12 | 2.07E-11  | PIPERACILLIN SODIUM              |
| 6.392697 | -0.07295 | -0.090982184 | -9.098218391 | -1.98607 | 0.047026 | 0.144608  | Posaconazole                     |
| 6.518514 | -0.32971 | -0.09110054  | -9.110054008 | -1.94287 | 0.052032 | 0.154638  | TOLNAFTATE                       |
| 6.528917 | -0.42693 | -0.091408936 | -9.140893608 | -1.53755 | 0.124159 | 0.284341  | FLURANDRENOLIDE                  |
| 6.478566 | -0.25985 | -0.091428467 | -9.142846693 | -3.51335 | 0.000442 | 0.002958  | PROCODAZOLE                      |
| 6.536558 | -0.44336 | -0.091469889 | -9.146989011 | -1.53857 | 0.123908 | 0.284234  | ANASTROZOLE                      |
| 6.462874 | -0.32271 | -0.091469894 | -9.146989378 | -7.16663 | 7.69E-13 | 1.52E-11  | MOXALACTAM DISODIUM              |
| 6.523746 | -0.33338 | -0.091487689 | -9.148768895 | -1.3971  | 0.045814 | 0.141819  | Moxonidine                       |
| 6.396199 | -0.07891 | -0.091600007 | -9.1600007   | -1.99975 | 0.045527 | 0.141187  | LDK378                           |
| 6.503791 | -0.36728 | -0.091863308 | -9.186330754 | -7.19745 | 6.14E-13 | 1.23E-11  | ESTRIOL                          |
| 6.519828 | -0.32802 | -0.092012194 | -9.201219399 | -2.52204 | 0.011668 | 0.048846  | ALLYLESTRENOL                    |
| 6.482874 | -0.25215 | -0.092036257 | -9.203625676 | -2.00908 | 0.044529 | 0.138427  | Otenabant (CP-945598) HCl        |
| 6.487138 | -0.33708 | -0.092042847 | -9.204284683 | -1.54821 | 0.121571 | 0.281014  | Testosterone Enanthate           |
| 6.49693  | -0.35266 | -0.092096018 | -9.2096018   | -7.21569 | 5.37E-13 | 1.08E-11  | AMINOCAPROIC ACID HYDROCHLORIDE  |
| 6.536558 | -0.44369 | -0.092301648 | -9.230164759 | -2.04538 | 0.040817 | 0.129722  | Astaxanthin                      |
| 6.494155 | -0.28165 | -0.092326249 | -9.23262487  | -1.74642 | 0.080738 | 0.211663  | ISRADIPINE                       |
| 6.463893 | -0.21444 | -0.092394193 | -9.239419328 | -2.01689 | 0.043707 | 0.136534  | Vismodegib (GDC-0449)            |
| 6.522444 | -0.41301 | -0.092591065 | -9.259106488 | -1.55743 | 0.119368 | 0.277432  | RIVASTIGMINE TARTRATE            |
| 6.515874 | -0.32435 | -0.092781084 | -9.278108374 | -1.97871 | 0.047849 | 0.146347  | TRIMEPRAZINE TARTRATE            |
| 6.50515  | -0.29931 | -0.093179012 | -9.317901207 | -2.55402 | 0.010649 | 0.045701  | DEXLANSOPRAZOLE                  |
| 6.499687 | -0.35884 | -0.093215559 | -9.321555858 | -7.3034  | 2.81E-13 | 5.79E-12  | INDAPAMIDE                       |
| 6.49276  | -0.27882 | -0.093258624 | -9.325862413 | -1.76406 | 0.077722 | 0.205534  | PENTAGASTRIN                     |
| 6.498311 | -0.23963 | -0.093310931 | -9.331093081 | -2.61246 | 0.006989 | 0.039541  | FOXCOPRINE                       |
| 6.49276  | -0.34378 | -0.093383881 | -9.338388714 | -7.2636  | 1.79E-13 | 3.90E-12  | DEMEGLOCYCLINE HYDROCHLORIDE     |
| 6.513218 | -0.33002 | -0.094079227 | -9.407922746 | -3.61521 | 0.0003   | 0.002085  | PHENOTHIRIN                      |
| 6.52763  | -0.42416 | -0.094196023 | -9.419602326 | -1.58443 | 0.113096 | 0.267832  | DESOGLYCELINE                    |
| 6.518514 | -0.32298 | -0.094224866 | -9.422486622 | -2.05685 | 0.0397   | 0.126725  | Deoxycholic acid                 |
| 6.498311 | -0.28871 | -0.094313932 | -9.431393177 | -2.0114  | 0.044283 | 0.137829  | PYRILAMINE MALEATE               |
| 6.502427 | -0.36438 | -0.094412365 | -9.441236499 | -7.39717 | 1.39E-13 | 3.00E-12  | OXYTETRACYCLINE                  |
| 6.521138 | -0.34605 | -0.094429403 | -9.442940253 | -3.62867 | 0.000285 | 0.001998  | ISAXONINE                        |
| 6.499687 | -0.28862 | -0.094692846 | -9.469284633 | -2.59552 | 0.009445 | 0.041191  | AMINOHIPURIC ACID                |
| 6.491362 | -0.3408  | -0.094776253 | -9.477625292 | -7.42568 | 1.12E-13 | 2.43E-12  | BETHANECHOL CHLORIDE             |
| 6.509203 | -0.30723 | -0.094999177 | -9.499917726 | -2.60391 | 0.009217 | 0.040332  | TRETINOIN                        |
| 6.514548 | -0.32294 | -0.095040878 | -9.5040878   | -1.79777 | 0.072213 | 0.194904  | ACESULFAME POTASSIUM             |
| 6.502427 | -0.29398 | -0.095128772 | -9.51287723  | -2.60747 | 0.009122 | 0.040053  | CARVEDILOL                       |
| 6.502427 | -0.36438 | -0.095264482 | -9.526448247 | -7.46393 | 8.39E-14 | 1.84E-12  | METHYLPREDNISOLONE               |
| 6.522444 | -0.33314 | -0.095310931 | -9.531093081 | -2.61246 | 0.006989 | 0.039541  | FOLIC ACID                       |
| 6.537819 | -0.36135 | -0.095315699 | -9.531569895 | -2.08086 | 0.037485 | 0.120859  | Trizolam (AV-951)                |
| 6.514548 | -0.32166 | -0.09535213  | -9.535212962 | -2.03354 | 0.041988 | 0.132488  | PROBUCOL                         |
| 6.549003 | -0.39271 |              |              |          |          |           |                                  |

|          |          |              |               |          |            |          |                               |
|----------|----------|--------------|---------------|----------|------------|----------|-------------------------------|
| 6.437751 | -0.23087 | -0.098905397 | -9.890539718  | -1.66364 | 0.096184   | 0.238595 | Vildagliptin (LAF-237)        |
| 6.534026 | -0.43824 | -0.099074827 | -9.907482719  | -2.19548 | 0.028129   | 0.096724 | Menatetrenone                 |
| 6.542825 | -0.37129 | -0.099167232 | -9.916723175  | -2.16474 | 0.030408   | 0.102696 | Dofetilide                    |
| 6.509203 | -0.30723 | -0.09944239  | -9.944239016  | -2.7257  | 0.006416   | 0.02992  | FENOFIBRIC ACID               |
| 6.488551 | -0.26683 | -0.099578233 | -9.957823264  | -2.72943 | 0.006344   | 0.029661 | CITALOPRAM HYDROBROMIDE       |
| 6.457882 | -0.2082  | -0.099739871 | -9.973987137  | -1.88666 | 0.059207   | 0.169011 | METHYLPHENIDATE HYDROCHLORIDE |
| 6.513218 | -0.31246 | -0.099921353 | -9.992135255  | -2.1812  | 0.029168   | 0.099429 | Maraviroc                     |
| 6.505115 | -0.28623 | -0.101350172 | -10.01350172  | -2.02825 | 0.032825   | 0.108588 | Tamoxifen hydrobromide        |
| 6.480007 | -0.3166  | -0.100340066 | -10.03400663  | -7.8616  | 3.77E-15   | 0.07E-14 | METHSCOPOLAMINE BROMIDE       |
| 6.485721 | -0.28129 | -0.100451163 | -10.0451163   | -2.75335 | 0.005899   | 0.02793  | FLUCONAZOLE                   |
| 6.506505 | -0.30666 | -0.100530097 | -10.05300973  | -1.9016  | 0.057223   | 0.16506  | MEGLUTOL                      |
| 6.567026 | -0.43898 | -0.100669702 | -10.06697018  | -3.86847 | 0.00011    | 0.000825 | CEPHALOSPORIN C Zn            |
| 6.509203 | -0.31212 | -0.100673232 | -10.0673232   | -1.90431 | 0.05687    | 0.164319 | TIBOLONE                      |
| 6.482874 | -0.32271 | -0.101014044 | -10.10140437  | -7.91441 | 2.44E-15   | 5.96E-14 | NIFEDIPINE                    |
| 6.502427 | -0.29398 | -0.101158371 | -10.11583711  | -2.77274 | 0.005559   | 0.026724 | MEFLOQUINE HYDROCHLORIDE      |
| 6.511883 | -0.3098  | -0.101323981 | -10.13239811  | -2.21182 | 0.026979   | 0.093713 | Potassium Iodide              |
| 6.525045 | -0.33596 | -0.101416988 | -10.14169883  | -2.21385 | 0.026839   | 0.09329  | Iloperidone                   |
| 6.502427 | -0.2984  | -0.101569294 | -10.15692938  | -1.92126 | 0.054699   | 0.15968  | PROTIRELIN                    |
| 6.545307 | -0.395   | -0.10168386  | -10.16838598  | -3.90744 | 9.33E-05   | 0.000714 | IPRIFLAVONE                   |
| 6.546543 | -0.38773 | -0.101883356 | -10.18833565  | -1.9272  | 0.053955   | 0.15849  | PRULIFLOXACIN                 |
| 6.439333 | -0.23447 | -0.101959494 | -10.19594939  | -2.2594  | 0.023858   | 0.084791 | Cefoxitin Na                  |
| 6.537819 | -0.37007 | -0.101975758 | -10.19757578  | -1.92895 | 0.053737   | 0.159123 | ATRACURIUM BESYLATE           |
| 6.507856 | -0.30939 | -0.101913328 | -10.215133285 | -1.93227 | 0.053326   | 0.157276 | CYPROHEPTADINE HYDROCHLORIDE  |
| 6.503791 | -0.36728 | -0.102304345 | -10.23043447  | -8.0155  | 1.11E-15   | 2.75E-14 | FLUMETHAZONE PIVALATE         |
| 6.515874 | -0.39918 | -0.102311662 | -10.23116617  | -2.2672  | 0.023378   | 0.083469 | Flurandrenolide               |
| 6.494155 | -0.34675 | -0.102333075 | -10.23330747  | -8.01775 | 1.11E-15   | 2.75E-14 | NITROFURANTOIN                |
| 6.485721 | -0.25781 | -0.102493135 | -10.24931346  | -2.23734 | 0.025264   | 0.088719 | 17-AAG (Tanespimycin)         |
| 6.525045 | -0.33823 | -0.102670224 | -10.26702243  | -2.81418 | 0.00489    | 0.02396  | TRAZODONE HYDROCHLORIDE       |
| 6.480007 | -0.253   | -0.102708467 | -10.27084672  | -1.94281 | 0.052039   | 0.154638 | NIZATIDINE                    |
| 6.519828 | -0.32802 | -0.102842262 | -10.28422624  | -2.81889 | 0.004819   | 0.023679 | IRBESARTAN                    |
| 6.534026 | -0.35381 | -0.102954441 | -10.29544412  | -2.24741 | 0.024614   | 0.086852 | Amuvatinib (MP-470)           |
| 6.468347 | -0.29667 | -0.103478592 | -10.34785916  | -1.74057 | 0.081759   | 0.213032 | Rofecoxib                     |
| 6.468347 | -0.29667 | -0.103642875 | -10.36428745  | -1.74333 | 0.081276   | 0.212096 | Azilsartan                    |
| 6.503791 | -0.29665 | -0.103680751 | -10.36807507  | -2.84187 | 0.004485   | 0.022381 | BROMPHENIRAMINE MALEATE       |
| 6.552688 | -0.47835 | -0.103954299 | -10.39542985  | -2.30361 | 0.021245   | 0.078023 | Betulin                       |
| 6.528917 | -0.42693 | -0.104085933 | -10.40859334  | -1.75078 | 0.079983   | 0.210223 | USNIC ACID                    |
| 6.431364 | -0.21732 | -0.104108477 | -10.41084769  | -3.30702 | 0.021054   | 0.077439 | Lorcaserin                    |
| 6.514548 | -0.32166 | -0.104134877 | -10.41348772  | -2.22085 | 0.026361   | 0.091937 | VALPROATE SODIUM              |
| 6.498311 | -0.3556  | -0.104293082 | -10.4293082   | -8.17132 | 2.22E-16   | 5.60E-15 | DIFLUBENZURON                 |
| 6.501059 | -0.28829 | -0.104305381 | -10.43053813  | -2.2769  | 0.022792   | 0.082117 | CX-4945 (Silmnaterib)         |
| 6.502427 | -0.36438 | -0.104312578 | -10.43125784  | -8.17285 | 2.22E-16   | 5.60E-15 | NITROFURAZONE                 |
| 6.471292 | -0.30324 | -0.104353995 | -10.43539953  | -2.31246 | 0.020752   | 0.076605 | Darunavir                     |
| 6.49693  | -0.29703 | -0.104368674 | -10.43686737  | -4.01061 | 6.06E-05   | 0.00048  | meta-CRESYL ACETATE           |
| 6.477121 | -0.24072 | -0.104538141 | -10.45381414  | -2.28198 | 0.02249    | 0.081436 | Alcaftadine                   |
| 6.509203 | -0.30448 | -0.104569229 | -10.45692286  | -2.28266 | 0.02245    | 0.081406 | Alibendol                     |
| 6.514548 | -0.33271 | -0.104605874 | -10.46058736  | -4.01972 | 5.83E-05   | 0.000464 | EFAROXAN HYDROCHLORIDE        |
| 6.518514 | -0.32298 | -0.10476893  | -10.47689295  | -2.28702 | 0.022195   | 0.080823 | Filgotinib (GLP0634)          |
| 6.531479 | -0.43244 | -0.104998948 | -10.49989483  | -1.76614 | 0.077372   | 0.204594 | Cabozantinib malate (XL184)   |
| 6.471292 | -0.30324 | -0.105060655 | -10.5060655   | -2.32812 | 0.019906   | 0.074283 | Ciavulanate Potassium         |
| 6.457882 | -0.27438 | -0.105243151 | -10.52431511  | -2.33217 | 0.019692   | 0.073593 | ARRY380                       |
| 6.471292 | -0.30324 | -0.105259588 | -10.52595884  | -2.33253 | 0.019673   | 0.073575 | Cidofovir                     |
| 6.525045 | -0.33597 | -0.105981892 | -10.59819205  | -4.0726  | 4.65E-05   | 0.00038  | BETA-MIPRON                   |
| 6.499687 | -0.35854 | -0.106019149 | -10.60191493  | -8.30656 | 0          | 5.60E-15 | DEXTRMETHORPHAN HYDROBROMIDE  |
| 6.531479 | -0.34875 | -0.106636834 | -10.66368336  | -2.3278  | 0.019923   | 0.074294 | Ozanimod (RPC1063)            |
| 6.515874 | -0.32029 | -0.106722149 | -10.67221486  | -2.92524 | 0.003442   | 0.017909 | NATEGLINIDE                   |
| 6.491362 | -0.26902 | -0.107555137 | -10.75551367  | -2.34784 | 0.018883   | 0.07114  | Lenvatinib (E7080)            |
| 6.485721 | -0.25781 | -0.107825695 | -10.78256952  | -2.35375 | 0.018585   | 0.070203 | Albendazole Oxide             |
| 6.502427 | -0.29398 | -0.107968881 | -10.79688815  | -2.95941 | 0.003082   | 0.016269 | CHLOROGUANIDE HYDROCHLORIDE   |
| 6.49693  | -0.28591 | -0.108016639 | -10.80166391  | -2.30363 | 0.021243   | 0.078023 | TENYLIDONE                    |
| 6.518514 | -0.32971 | -0.108325421 | -10.83254212  | -2.31022 | 0.020876   | 0.076951 | CEFOTETAN                     |
| 6.525045 | -0.33596 | -0.108466839 | -10.84668386  | -2.36774 | 0.017897   | 0.068281 | Etoricoxib                    |
| 6.457882 | -0.27417 | -0.108559705 | -10.85597047  | -1.82603 | 0.067845   | 0.186456 | TRIAMCINOLONE DIACETATE       |
| 6.503791 | -0.29983 | -0.108637376 | -10.86373765  | -2.31687 | 0.020511   | 0.075933 | CHLOROQUINE DIPHOSPHATE       |
| 6.495844 | -0.35516 | -0.108675268 | -10.86752678  | -1.82798 | 0.067553   | 0.185852 | Tirofiban HCl                 |
| 6.5302   | -0.3462  | -0.109174019 | -10.91740185  | -2.33318 | 0.017164   | 0.066512 | Naratriptan                   |
| 6.525045 | -0.34296 | -0.109403943 | -10.94039427  | -2.33322 | 0.019637   | 0.073494 | STREPTOZOSIN                  |
| 6.477121 | -0.31045 | -0.109410453 | -10.94104533  | -8.7226  | 0          | 5.60E-15 | ETHIONAMIDE                   |
| 6.511883 | -0.3098  | -0.109710644 | -10.97106436  | -2.39489 | 0.016625   | 0.064928 | EX 527 (Selsislat)            |
| 6.505115 | -0.30259 | -0.110009358 | -11.00093577  | -2.34613 | 0.018969   | 0.071309 | SACCHARIN                     |
| 6.518514 | -0.32545 | -0.110613192 | -11.06131922  | -3.03189 | 0.00243    | 0.013294 | TRIFLUMURON                   |
| 6.431364 | -0.21732 | -0.110836373 | -11.08363729  | -2.45611 | 0.014045   | 0.056756 | Mizolastine                   |
| 6.541579 | -0.36882 | -0.110890529 | -11.08905288  | -2.42065 | 0.015493   | 0.061206 | Melatonin                     |
| 6.565848 | -0.43659 | -0.111138087 | -11.11380866  | -4.27074 | 1.95E-05   | 0.000173 | PROTOPORPHYRIN IX             |
| 6.518514 | -0.32971 | -0.111159539 | -11.11595393  | -2.37066 | 0.017756   | 0.067997 | ATENOLOL                      |
| 6.469822 | -0.24214 | -0.111223535 | -11.12235351  | -4.27402 | 1.92E-05   | 0.000171 | IDRAMANTONE                   |
| 6.488551 | -0.26891 | -0.111667609 | -11.1667609   | -2.3815  | 0.017242   | 0.066477 | SULFAMONIMETHOXINE            |
| 6.540329 | -0.36633 | -0.112092368 | -11.20923683  | -2.44689 | 0.01441    | 0.057956 | Fluoxymesterone               |
| 6.519828 | -0.32802 | -0.112118741 | -11.21187412  | -2.07316 | 0.002118   | 0.011865 | ARMODAFINIL                   |
| 6.505115 | -0.30391 | -0.11275125  | -11.27512498  | -2.13278 | 0.032943   | 0.108959 | ZOLMITRIPTAN                  |
| 6.49276  | -0.2718  | -0.112763292 | -11.27632924  | -2.46153 | 0.017664   | 0.055994 | Naratriptan                   |
| 6.505115 | -0.31018 | -0.11287652  | -11.28765197  | -8.84983 | 0          | 5.60E-15 | FLUCICINOLONE ACETONIDE       |
| 6.49693  | -0.28009 | -0.113249074 | -11.32490737  | -2.47214 | 0.013431   | 0.054576 | Povidone iodine               |
| 6.513218 | -0.32025 | -0.113296553 | -11.32965529  | -2.14309 | 0.032106   | 0.107089 | PHENYLETHYL ALCOHOL           |
| 6.553883 | -0.40259 | -0.113357623 | -11.33576235  | -2.14425 | 0.032013   | 0.106989 | PREDNISOLONE SODIUM PHOSPHATE |
| 6.518514 | -0.32298 | -0.113365328 | -11.33653284  | -2.47467 | 0.013336   | 0.054276 | Malotilate                    |
| 6.521138 | -0.33504 | -0.113815332 | -11.3815332   | -2.4273  | 0.015212   | 0.06032  | UREA                          |
| 6.510545 | -0.30714 | -0.113999602 | -11.39996017  | -2.48852 | 0.012828   | 0.052753 | Dapoxetine HCl                |
| 6.503791 | -0.30116 | -0.114189752 | -11.41897517  | -2.15999 | 0.030774   | 0.103796 | RISPERIDONE                   |
| 6.549003 | -0.39271 | -0.114535251 | -11.4535251   | -2.16652 | 0.030271   | 0.102371 | EXEMESTANE                    |
| 6.511883 | -0.31755 | -0.114733717 | -11.47337174  | -2.17028 | 0.029986   | 0.101607 | SOTALOL HYDROCHLORIDE         |
| 6.507856 | -0.30939 | -0.114961128 | -11.49611283  | -2.17458 | 0.029662   | 0.100776 | PHYSOSTIGMINE SULFATE         |
| 6.519828 | -0.32802 | -0.115163669 | -11.51636695  | -3.15662 | 0.001596   | 0.009318 | CARVEDILOL PHOSPHATE          |
| 6.488551 | -0.26344 | -0.115218747 | -11.52187473  | -2.51513 | 0.011899   | 0.049611 | Cilengitide                   |
| 6.501059 | -0.28829 | -0.115396311 | -11.53963108  | -2.51901 | 0.011769   | 0.049188 | Molindolol (VTX-2337)         |
| 6.519828 | -0.33298 | -0.115830159 | -11.5830159   | -2.47033 | 0.013498   | 0.054765 | OCTODRINE                     |
| 6.447168 | -0.18118 | -0.115858853 | -11.58588525  | -2.5291  | 0.011435   | 0.048189 | Pexidartinib (PLX3397)        |
| 6.521138 | -0.33504 | -0.116086357 | -11.60863569  | -2.47573 | 0.013296   | 0.054201 | DIFLOXACIN HYDROCHLORIDE      |
| 6.503791 | -0.29372 | -0.116247085 | -11.62470849  | -2.53758 | 0.011162   | 0.047244 | Pranlukast                    |
| 6.499687 | -0.35854 | -0.116264977 | -11.62649769  | -9.10931 | 0          | 5.60E-15 | ATROPINE SULFATE              |
| 6.465383 | -0.2903  | -0.116459963 | -11.64599631  | -1.95892 | 0.050122   | 0.150511 | Bepotastine Besilate          |
| 6.518514 | -0.32971 | -0.116631704 | -11.66317043  | -2.48736 | 0.012869   | 0.05284  | DOXIFLURIDINE                 |
| 6.466868 | -0.29372 | -0.116859389 | -11.68593887  | -2.58958 | 0.009609   | 0.04173  | Benzazac L-lysine             |
| 6.539076 | -0.36384 | -0.117450558 | -11.74505582  | -2.56385 | 0.010352   | 0.044464 | Quizartinib (AC220)           |
| 6.528917 | -0.36181 | -0.117512655 | -11.75126552  | -4.5157  | 6.31E-06   | 6.04E-05 | GUANIDINE HYDROCHLORIDE       |
| 6.49276  | -0.2718  | -0.117527651 | -11.75276501  | -2.56553 | 0.010302   | 0.044286 | Zafirlukast                   |
| 6.509203 | -0.31212 | -0.117589166 | -11.7589166   | -2.22429 | 0.026129   | 0.091256 | ETHYL PARABEN                 |
| 6.517196 | -0.32287 | -0.118087677 | -11.80876768  | -2.32677 | 0.001209   | 0.007334 | TRIMETOZINE                   |
| 6.429752 | -0.21385 | -0.118478932 | -11.84789316  | -2.62547 | 0.008653   | 0.038193 | Kisamycin                     |
| 6.537819 | -0.36322 | -0.118544243 | -11.85442426  | -2.24929 | 0.001157   | 0.007076 | ISOPROPREDONE ACETATE         |
| 6.505115 | -0.27882 | -0.118425716 | -11.84257158  | -2.60897 | 0.009135   | 0.040077 | Gimeracil                     |
| 6.49276  | -0.27882 | -0.119471504 | -11.9471504   | -2.25989 | 0.023828   | 0.084791 | CAPTAMINE                     |
| 6.521138 | -0.4102  | -0.119836    | -11.98359999  | -2.01571 | 0.043831</ |          |                               |

|          |          |              |              |           |          |          |                                        |
|----------|----------|--------------|--------------|-----------|----------|----------|----------------------------------------|
| 6.50515  | -0.30391 | -0.124622211 | -12.46222108 | -2.35732  | 0.018407 | 0.069759 | TERPENE HYDRATE                        |
| 6.49687  | -0.35854 | -0.124693242 | -12.46932425 | -9.76966  | 0        | 5.60E-15 | GUAIFENESIN                            |
| 6.544068 | -0.45951 | -0.124719624 | -12.47196244 | -2.09785  | 0.035918 | 0.116688 | HYDROQUININE HYDROBROMIDE HYDRATE      |
| 6.507856 | -0.37594 | -0.125329191 | -12.53291901 | -9.81949  | 0        | 5.60E-15 | MECAMYLAMINE HYDROCHLORIDE             |
| 6.522444 | -0.40703 | -0.125450023 | -12.54500226 | -9.82896  | 0        | 5.60E-15 | CHLORPROMAZINE HYDROCHLORIDE           |
| 6.517196 | -0.39885 | -0.125554439 | -12.55544394 | -9.83714  | 0        | 5.60E-15 | FLUDOCORTISONE ACETATE                 |
| 6.519828 | -0.33236 | -0.125596428 | -12.55964283 | -2.67955  | 0.007394 | 0.033621 | DAPAGLIFLOZIN                          |
| 6.511863 | -0.38453 | -0.125630488 | -12.56304884 | -9.8431   | 0        | 5.60E-15 | PHENINDIOLIN                           |
| 6.501059 | -0.29563 | -0.125731251 | -12.57312508 | -2.3783   | 0.017393 | 0.068955 | DOXAZOSIN MESYLATE                     |
| 6.507856 | -0.3018  | -0.125878283 | -12.58782834 | -2.74782  | 0.005999 | 0.028233 | Evacetrapib (LY2484595)                |
| 6.502427 | -0.29101 | -0.12610863  | -12.61086299 | -2.75285  | 0.005908 | 0.02793  | Ciclesonide                            |
| 6.478566 | -0.2436  | -0.126594775 | -12.65947752 | -2.76346  | 0.005719 | 0.027265 | R788 (Fostamatinib) Disodium           |
| 6.456366 | -0.19948 | -0.126748934 | -12.67489345 | -2.76683  | 0.00566  | 0.027035 | Suprofen                               |
| 6.466868 | -0.29372 | -0.126924606 | -12.69246059 | -2.81262  | 0.004914 | 0.024053 | Gamma-Oryzanol                         |
| 6.531479 | -0.35082 | -0.127151138 | -12.71511384 | -3.48519  | 0.000492 | 0.003241 | ACETYLSEROTONIN                        |
| 6.518514 | -0.32298 | -0.127448929 | -12.74489289 | -2.78211  | 0.005401 | 0.026087 | Amprenavir                             |
| 6.507856 | -0.37594 | -0.127740952 | -12.77409517 | -10.0085  | 0        | 5.60E-15 | AMANTADINE HYDROCHLORIDE               |
| 6.513218 | -0.31896 | -0.127880028 | -12.7880028  | -2.72725  | 0.006386 | 0.029807 | GALANTAMINE                            |
| 6.536558 | -0.35884 | -0.128050245 | -12.80502454 | -2.79523  | 0.005186 | 0.025169 | Uridine                                |
| 6.509203 | -0.32189 | -0.128070184 | -12.80701835 | -4.92139  | 8.69E-07 | 9.52E-06 | OROTIC ACID                            |
| 6.434569 | -0.22422 | -0.128264804 | -12.82648036 | -2.84232  | 0.004479 | 0.022381 | Icotinib                               |
| 6.528917 | -0.3498  | -0.128777894 | -12.87778938 | -5.52978  | 0.000416 | 0.002809 | LEFLUNOMIDE                            |
| 6.534026 | -0.35381 | -0.129330932 | -12.93309322 | -2.82773  | 0.004688 | 0.023168 | Balofloxacin                           |
| 6.510545 | -0.30714 | -0.129796601 | -12.97966103 | -2.83335  | 0.004606 | 0.022897 | Vidofludimus                           |
| 6.495544 | -0.27733 | -0.129951636 | -12.99516361 | -2.83674  | 0.004558 | 0.022678 | Tedizolid Phosphate                    |
| 6.469822 | -0.22622 | -0.130439621 | -13.04396208 | -2.84739  | 0.004408 | 0.022104 | Anidulafungin (LY303366)               |
| 6.519828 | -0.33363 | -0.130507477 | -13.05074773 | -2.46865  | 0.013562 | 0.05498  | ORBITOXACIN                            |
| 6.518514 | -0.39865 | -0.130580904 | -13.05809039 | -10.231   | 0        | 5.60E-15 | DEXAMETHASONE ACETATE                  |
| 6.503791 | -0.29372 | -0.131145839 | -13.11458393 | -2.86281  | 0.004199 | 0.021202 | Diphenidol HCl                         |
| 6.534026 | -0.37215 | -0.132303455 | -13.23034551 | -5.08407  | 3.69E-07 | 4.27E-06 | DEFERIPRONE                            |
| 6.518514 | -0.32298 | -0.132370561 | -13.23705613 | -2.88954  | 0.003858 | 0.019773 | VX-222 (VCH-222, Lomibuvir)            |
| 6.540329 | -0.36813 | -0.132658708 | -13.26587085 | -3.63616  | 0.000277 | 0.001946 | TEGASEROD MALEATE                      |
| 6.475671 | -0.23784 | -0.132756694 | -13.27566942 | -2.89797  | 0.003756 | 0.019288 | Ripasudil (K-115)                      |
| 6.469822 | -0.22622 | -0.132840386 | -13.28403864 | -2.8998   | 0.003734 | 0.019214 | LY2157299                              |
| 6.513218 | -0.38737 | -0.133286722 | -13.32867217 | -10.443   | 0        | 5.60E-15 | NOSCAPINE HYDROCHLORIDE                |
| 6.564666 | -0.50417 | -0.134511556 | -13.45115563 | -2.98075  | 0.002875 | 0.015352 | Mestrolone                             |
| 6.561101 | -0.41721 | -0.134751757 | -13.47517566 | -2.548257 | 0.010605 | 0.046257 | LINDANE                                |
| 6.502427 | -0.25707 | -0.135300167 | -13.53001667 | -2.8855   | 0.003906 | 0.019949 | SULFAMETHOXYPIRIDAZINE                 |
| 6.481443 | -0.31966 | -0.135572245 | -13.55722449 | -10.622   | 0        | 5.60E-15 | METHOXSALEN                            |
| 6.4843   | -0.33098 | -0.135811983 | -13.58119833 | -2.28443  | 0.022346 | 0.081237 | Quinidine HCl H2O                      |
| 6.507856 | -0.37594 | -0.136116268 | -13.61162681 | -10.6647  | 0        | 5.60E-15 | BISACODYL                              |
| 6.525045 | -0.33596 | -0.136348342 | -13.63483417 | -2.97637  | 0.002917 | 0.01554  | CB1954                                 |
| 6.485721 | -0.25781 | -0.13660706  | -13.66070596 | -2.98202  | 0.002864 | 0.015304 | 5,5-Dimethylloxazolidine-2,4-dione     |
| 6.510545 | -0.38167 | -0.137105658 | -13.71056577 | -10.7422  | 0        | 5.60E-15 | PINDOLOL                               |
| 6.525045 | -0.33596 | -0.137484668 | -13.74846668 | -3.00118  | 0.002689 | 0.014525 | Regorafenib (BAY 73-4506)              |
| 6.571709 | -0.51932 | -0.13818013  | -13.81801299 | -3.06204  | 0.002198 | 0.012221 | Etilefrine hydrochloride               |
| 6.49276  | -0.2718  | -0.138411376 | -13.84113764 | -3.02141  | 0.002516 | 0.013734 | Rifabutin                              |
| 6.478566 | -0.2473  | -0.138723489 | -13.87234893 | -3.80239  | 0.000143 | 0.001066 | ALOGLIPTIN BENZOATE                    |
| 6.522444 | -0.40703 | -0.138776947 | -13.87769467 | -10.8731  | 0        | 5.60E-15 | DEXAMETHASONE                          |
| 6.456366 | -0.27112 | -0.139493017 | -13.94930169 | -3.09114  | 0.001994 | 0.011323 | Capreomycin disulfate                  |
| 6.52763  | -0.34821 | -0.14059754  | -14.05975398 | -2.99848  | 0.002713 | 0.014623 | ISOTRETINON                            |
| 6.482874 | -0.25215 | -0.141089991 | -14.10899907 | -3.07988  | 0.002071 | 0.011651 | Talidogel (LY2940680)                  |
| 6.507856 | -0.3018  | -0.141147195 | -14.11471951 | -3.08113  | 0.002062 | 0.011615 | BIRB 796 (Doramipimod)                 |
| 6.471292 | -0.22914 | -0.142684275 | -14.26842753 | -3.11468  | 0.001841 | 0.010558 | Nalmefene HCl                          |
| 6.518514 | -0.40456 | -0.142708996 | -14.27089961 | -2.40044  | 0.016375 | 0.064295 | LY2228820                              |
| 6.542825 | -0.45684 | -0.142746735 | -14.27467349 | -2.40108  | 0.016347 | 0.064233 | GESTODENE                              |
| 6.471292 | -0.23535 | -0.144031394 | -14.40313941 | -2.72446  | 0.006441 | 0.030005 | THEOBROMINE                            |
| 6.510545 | -0.38167 | -0.144539313 | -14.45393131 | -11.3246  | 0        | 5.60E-15 | ISOPROTERENOL HYDROCHLORIDE            |
| 6.514548 | -0.3151  | -0.144630046 | -14.46300457 | -3.15716  | 0.001593 | 0.009312 | Stanozolol                             |
| 6.485721 | -0.25781 | -0.144810684 | -14.48106841 | -3.1611   | 0.001572 | 0.009227 | Divalproex Sodium                      |
| 6.526339 | -0.41533 | -0.145958894 | -14.59588939 | -11.4358  | 0        | 5.60E-15 | HYDROCORTISONE HEMISUCCINATE           |
| 6.532754 | -0.35331 | -0.146402004 | -14.64020043 | -4.01286  | 6.00E-05 | 0.000476 | BUPIVACAINE HYDROCHLORIDE              |
| 6.4843   | -0.25499 | -0.146461832 | -14.64618317 | -3.19714  | 0.001388 | 0.008263 | Meprednisone                           |
| 6.528917 | -0.35204 | -0.147128214 | -14.71282137 | -2.78304  | 0.005385 | 0.026036 | TEMEFOS                                |
| 6.532754 | -0.35331 | -0.14726406  | -14.72640604 | -4.03649  | 5.43E-05 | 0.000435 | VALACYCLOVIR HYDROCHLORIDE             |
| 6.526339 | -0.35659 | -0.148022336 | -14.8022336  | -3.70658  | 1.15E-08 | 5.60E-15 | ETHINYL ESTRADIOL                      |
| 6.503791 | -0.36726 | -0.148694457 | -14.86944567 | -11.6501  | 0        | 5.60E-15 | MOROXIDINE HYDROCHLORIDE               |
| 6.52763  | -0.34943 | -0.149434862 | -14.94348624 | -2.82667  | 0.004703 | 0.023222 | LACITOL                                |
| 6.465383 | -0.22339 | -0.149616208 | -14.96162076 | -2.8301   | 0.004653 | 0.023042 | ZILEUTON                               |
| 6.440405 | -0.24461 | -0.14962932  | -14.96293204 | -3.31575  | 0.000914 | 0.0057   | Benorlate                              |
| 6.519828 | -0.40145 | -0.149832731 | -14.9832731  | -11.7393  | 0        | 5.60E-15 | IMIPRAMINE HYDROCHLORIDE               |
| 6.454845 | -0.19645 | -0.150734977 | -15.07349768 | -3.29042  | 0.001    | 0.006186 | EPZ-6438                               |
| 6.55145  | -0.38843 | -0.151068642 | -15.10686424 | -3.29771  | 0.000975 | 0.006042 | Aprepitant                             |
| 6.475671 | -0.23784 | -0.151953463 | -15.19534629 | -3.31702  | 0.00091  | 0.005681 | Alvelestat (AZD9668)                   |
| 6.541579 | -0.36882 | -0.152059949 | -15.20599488 | -3.31935  | 0.000902 | 0.005641 | Etonogestrel                           |
| 6.523746 | -0.34157 | -0.152082236 | -15.20822357 | -2.87675  | 0.004018 | 0.020409 | DECAMETHONIUM BROMIDE                  |
| 6.550228 | -0.38601 | -0.152121034 | -15.2121034  | -3.32068  | 0.000898 | 0.005628 | Ponesimod                              |
| 6.535294 | -0.35633 | -0.152510145 | -15.2510145  | -3.32917  | 0.000871 | 0.005492 | Rocilinostat (ACY-1215)                |
| 6.540329 | -0.37398 | -0.154244766 | -15.42447661 | -3.28953  | 0.001004 | 0.006198 | RIFAMPIN                               |
| 6.481443 | -0.31966 | -0.154262298 | -15.42622975 | -12.0864  | 0        | 5.60E-15 | ETHINYL ESTRODIOL                      |
| 6.509203 | -0.32189 | -0.154843149 | -15.48431487 | -5.95027  | 2.68E-08 | 9.92E-08 | MOROXIDINE HYDROCHLORIDE               |
| 6.565303 | -0.48582 | -0.155455923 | -15.54559228 | -2.61502  | 0.008922 | 0.039279 | Heparin sodium                         |
| 6.5302   | -0.35464 | -0.155539927 | -15.55399272 | -2.94242  | 0.003257 | 0.017101 | METHYLPREDNISOLONE SODIUM SUCCINATE    |
| 6.564666 | -0.4342  | -0.157317696 | -15.73176964 | -6.0453   | 1.49E-09 | 2.28E-08 | FORMESTANE                             |
| 6.558709 | -0.40286 | -0.158213213 | -15.82132132 | -3.45367  | 0.000553 | 0.003602 | Dutasteride                            |
| 6.543307 | -0.46218 | -0.158265116 | -15.82651157 | -2.66211  | 0.007765 | 0.034937 | Radotinib                              |
| 6.540329 | -0.36813 | -0.160465238 | -16.04652378 | -4.39833  | 1.09E-05 | 0.000101 | BUPROPION                              |
| 6.510545 | -0.38771 | -0.160572535 | -16.05725354 | -3.55825  | 0.000373 | 0.002535 | Baricitinib (LY3009104, INCB028050)    |
| 6.535294 | -0.43441 | -0.162551897 | -16.25518971 | -12.7359  | 0        | 5.60E-15 | MEGESTROL ACETATE                      |
| 6.532754 | -0.35128 | -0.163542958 | -16.35429583 | -3.57001  | 0.000357 | 0.00243  | Emricasan                              |
| 6.536558 | -0.4371  | -0.163877631 | -16.38776315 | -12.8397  | 0        | 5.60E-15 | PREDNISOLONE                           |
| 6.525045 | -0.4186  | -0.164886773 | -16.48867731 | -2.77349  | 0.005546 | 0.026687 | Etravirine (TMC125)                    |
| 6.536558 | -0.35884 | -0.164887667 | -16.48876667 | -3.59936  | 0.000319 | 0.002192 | Ivacator (VX-770)                      |
| 6.49693  | -0.28009 | -0.165963988 | -16.59639878 | -3.62286  | 0.000291 | 0.002038 | Roxitrolin (INCB18424)                 |
| 6.514548 | -0.3902  | -0.167195812 | -16.71958117 | -13.0997  | 0        | 5.60E-15 | COMATRONE METHYLBROMIDE                |
| 6.557507 | -0.40993 | -0.16722619  | -16.72261899 | -3.1634   | 0.001559 | 0.009167 | RIZATRIPTAN BENZOATE                   |
| 6.49276  | -0.27745 | -0.16785817  | -16.78581701 | -3.57985  | 0.000344 | 0.002353 | NICERGOLINE                            |
| 6.485721 | -0.33429 | -0.168118292 | -16.81182921 | -3.72547  | 0.000195 | 0.000142 | Odanacatib (MK-0822)                   |
| 6.537819 | -0.43979 | -0.170454403 | -17.04544029 | -13.355   | 0        | 5.60E-15 | HYDROCORTISONE PHOSPHATE TRIETHYLAMINE |
| 6.535294 | -0.43441 | -0.172093347 | -17.20933471 | -13.4834  | 0        | 5.60E-15 | DEXAMETHASONE SODIUM PHOSPHATE         |
| 6.541579 | -0.4478  | -0.172525902 | -17.25259023 | -13.5173  | 0        | 5.60E-15 | PREDNISOLONE ACETATE                   |
| 6.523746 | -0.4098  | -0.172567008 | -17.25670083 | -13.5206  | 0        | 5.60E-15 | MAPROTIline HYDROCHLORIDE              |
| 6.567026 | -0.50889 | -0.17714107  | -17.71410703 | -2.97961  | 0.002886 | 0.015393 | Latanoprost                            |
| 6.511863 | -0.3098  | -0.17727522  | -17.7275219  | -3.86982  | 0.000109 | 0.000821 | Eltrombopag Olamine                    |
| 6.514548 | -0.31769 | -0.180568427 | -18.0568427  | -4.94936  | 7.45E-07 | 8.32E-06 | TACROLIMUS                             |
| 6.555094 | -0.40505 | -0.180818529 | -18.08185289 | -3.42032  | 0.000625 | 0.004038 | TROSPIDIUM CHLORIDE                    |
| 6.478566 | -0.3189  | -0.182523488 | -18.25234878 | -4.04468  | 5.24E-05 | 0.000423 | Bromfenac                              |
| 6.526339 | -0.41533 | -0.182881239 | -18.2881239  | -14.3287  | 0        | 5.60E-15 | IBUPROFEN                              |
| 6.562293 | -0.41962 | -0.184359042 | -18.43590417 | -3.48729  | 0.000498 | 0.003223 | EDITOL                                 |
| 6.499687 | -0.28557 | -0.185691622 | -18.56916223 | -4.0535   | 5.05E-05 | 0.000409 | Emricitabine                           |
| 6.468688 | -0.22035 | -0.18651646  | -18.65164598 | -4.0715   | 4.67E-05 | 0.000381 | Fluorometholone Acetate                |
| 6.550228 | -0.38601 | -0.188460433 | -18.84604333 | -4.11394  | 3.89E-05 | 0.000324 | Sorafenib                              |
| 6.459392 | -0.20549 |              |              |           |          |          |                                        |

|          |          |              |              |          |   |          |                     |
|----------|----------|--------------|--------------|----------|---|----------|---------------------|
| 6.643453 | -0.57127 | -0.390469608 | -39.04696084 | -8.52363 | 0 | 5.60E-15 | Entinostat (MS-275) |
| 6.913284 | -1.13037 | -0.916451089 | -91.6451089  | -17.3354 | 0 | 5.60E-15 | FLUORESCHEIN        |

|

Idarubicin (100%)
