# Supplementary material for: Repurposing anthelmintic agents to eradicate resistant leukemia
Source: PubMed Central journal article supplement (PMC7320149; doi:10.1038/s41408-020-0339-9), 2020-06-26
Supplement: 41408_2020_339_MOESM4_ESM.pdf [file 41408_2020_339_MOESM4_ESM.pdf]

**Supplementary Table S3:** Patient information of B- and T-ALL samples, and respective IC50 for each antihelmintic agent.

| Sample      | Risk Group | Clinical Stage | Age (years) | Sex    | Class | Moxidectin (Log IC50) | Milbemycin (Log IC50) | Ivermectin (Log IC50) |
|-------------|------------|----------------|-------------|--------|-------|-----------------------|-----------------------|-----------------------|
| B-R-03      |            | Relapse        | 5.7         | Female | B-ALL | 3.09482038            | 3.101747074           | 3.200576927           |
| B-R-10      |            | Relapse        | 9.7         | Male   | B-ALL | 2.99550357            | 3.159266331           | 3.183839037           |
| B-SR-03     | SR         | Diagnosis      | 3.4         | Female | B-ALL | 2.914396052           | 3.039414119           | 3.25163822            |
| B-R-01      |            | Relapse        | 9.6         | Female | B-ALL | 3.029789471           | 3.16613397            | 3.258637283           |
| B-SR-06     | SR         | Diagnosis      | 4           | Female | B-ALL | 2.711638538           | 3.026941628           | 3.182414652           |
| B-VHR-10    | VHR        | Diagnosis      | 14.4        | Female | B-ALL | 2.760120785           | 3.027757205           | 3.218010043           |
| T-VHR-04    | VHR        | Diagnosis      | 8           | Male   | T-ALL | 3.208441356           | 3.288025535           | 3.38774566            |
| B-VHR-12    | VHR        | Diagnosis      | 15.3        | Female | B-ALL | 3.314709693           | 3.254306332           | 3.448242413           |
| B-VHR-29    | VHR        | Diagnosis      | 1           | Female | B-ALL | 3.136086097           | 3.270445908           | 3.73183042            |
| B-SR-23     | SR         | Diagnosis      | 1.8         | Female | B-ALL | 2.996336518           | N/A                   | N/A                   |
| B-R-23      |            | Relapse        | 13          | Female | B-ALL | 3.075911761           | N/A                   | N/A                   |
| B-R-30      |            | Relapse        | 2           | Male   | B-ALL | 3.080987047           | N/A                   | N/A                   |
| B-R-29      |            | Relapse        | 17          | Female | B-ALL | 3.054995862           | N/A                   | N/A                   |
| T-non-HR-02 | non HR     | Diagnosis      | 7           | Male   | T-ALL | 3.13893394            | N/A                   | N/A                   |
| T-R-30      |            | Relapse        | 17          | Female | T-ALL | 2.882524538           | N/A                   | N/A                   |
| B-R-42      |            | Relapse        | 6           | Male   | B-ALL | 3.164947373           | 3.309417226           | 3.496929648           |
| B-R-26      |            | Relapse        | 10          | Male   | B-ALL | 3.254064453           | 3.271841607           | 3.428296814           |
| B-R-33      |            | Relapse        | 10          | Male   | B-ALL | 3.212187604           | 3.255031163           | 3.469232743           |
| B-R-34      |            | Relapse        | 11          | Female | B-ALL | 3.259593879           | 3.396373728           | 3.633872263           |
| B-R-28      |            | Relapse        | 3           | Male   | B-ALL | 3.206556044           | 3.29841638            | 3.546542663           |
| B-MR-02     | MR         | Diagnosis      | 2.5         | Male   | B-ALL | 2.627365857           | 2.481729197           | 3.307709923           |
| B-SR-25     | SR         | Diagnosis      | 1.2         | Male   | B-ALL | 3.017867719           | 2.930082633           | 3.268577972           |
| B-R-41      |            | Relapse        | 12          | Female | B-ALL | 3.05804623            | 3.13289977            | 3.263399331           |
| B-R-48      |            | Relapse        | 14.5        | Male   | B-ALL | 3.115277591           | 3.059941888           | 3.307923704           |
| B-HR-28     | HR         | Diagnosis      | 12.4        | Male   | B-ALL | 2.974235277           | 2.823409015           | 3.299725154           |
| B-MR-03     | MR         | Diagnosis      | 3.5         | Male   | B-ALL | 3.1430148             | 2.888628725           | 3.358125285           |
| B-R-50      |            | Relapse        | 19.4        | Male   | B-ALL | 3.462547729           | 3.309417226           | 3.527501011           |
| B-R-45      |            | Relapse        | 2           | Male   | B-ALL | 2.783331763           | 3.004751156           | 3.174350597           |
| B-R-40      |            | Relapse        | 15          | Female | B-ALL | 2.742489465           | N/A                   | 3.182699903           |
| B-HR-29     | HR         | Diagnosis      | 12.8        | Male   | B-ALL | 3.206015877           | 3.281033367           | 3.470263447           |
| B-R-47      |            | Relapse        | 2.5         | Male   | B-ALL | 3.196728723           | 3.169674434           | 3.208441356           |
| B-R-38      |            | Relapse        | 1           | Female | B-ALL | 3.301464073           | 2.848681654           | 3.684845362           |
| B-R-39      |            | Relapse        | 16          | Male   | B-ALL | 3.185542155           | 3.331832044           | 3.459241665           |
| B-R-44      |            | Relapse        | 16          | Male   | B-ALL | 3.10720997            | 3.317645543           | 3.529301998           |
| T-R-31      |            | Relapse        | 3           | Female | T-ALL | 3.010723865           | 2.828466547           | 3.219322508           |
| T-non-HR-01 | non HR     | Diagnosis      | 2.9         | Male   | T-ALL | 3.142076461           | 3.07809415            | 3.42078062            |
| B-R-35      |            | Relapse        | 7           | Male   | B-ALL | 3.220892249           | 3.397592434           | 3.396896449           |
| B-R-36      |            | Relapse        | 9 Months    | Male   | B-ALL | 3.227886705           | 3.25791845            | 3.482444792           |
| B-R-31      |            | Relapse        | 2           | Male   | B-ALL | 3.364363355           | 3.44294987            | 3.473632927           |
| B-R-51      |            | Relapse        | 7           | Male   | B-ALL | 3.399154334           | 3.43679851            | 3.514282048           |
| T-R-29      |            | Relapse        | 10          | Male   | T-ALL | 3.186391216           | 2.656481516           | 3.300378065           |
| B-R-46      |            | Relapse        | 6           | Female | B-ALL | 3.09725731            | 2.504334912           | 3.397418542           |
| T-R-28      |            | Relapse        | 13          | Male   | T-ALL | 3.116275588           | 3.258637283           | 3.501333179           |
| T-R-32      |            | Relapse        | 17          | Male   | T-ALL | 2.789651209           | 1.512150537           | 2.587374172           |
| B-HR-30     | HR         | Diagnosis      | 2           | Female | B-ALL | 3.316389751           | 3.447623098           | 3.599773939           |
| B-R-27      |            | Relapse        | 17          | Female | B-ALL | 3.314077992           | 3.45591024            | 3.693639026           |
| B-R-49      |            | Relapse        | 6.4         | Male   | B-ALL | 3.199206479           | 3.308350949           | 3.488550717           |
| B-SR-26     | SR         | Diagnosis      | 3.2         | Male   | B-ALL | 3.139879086           | 3.31196566            | 3.465828815           |
| B-R-43      |            | Relapse        | 4           | Female | B-ALL | 3.151982395           | 3.055378331           | 3.389520466           |
| B-R-32      |            | Relapse        | 6           | Male   | B-ALL | 3.441223674           | 3.460145817           | 3.600101256           |
| B-R-37      |            | Relapse        | 12          | Male   | B-ALL | 3.347720217           | 3.38147609            | 3.457276186           |
| B-MR-04     | MR         | Diagnosis      | 3.1         | Male   | B-ALL | 2.935507266           | 2.78554337            | 3.67669361            |
| B-MR-05     | MR         | Diagnosis      | 3.1         | Male   | B-ALL | 3.190891717           | 2.431363764           | 3.489536629           |
| B-VHR-02    | VHR        | Diagnosis      | 12.8        | Female | B-ALL | 3.339650158           | 3.006466042           | 3.71941416            |
| B-VHR-01    | VHR        | Diagnosis      | 14.1        | Male   | B-ALL | 3.14                  | N/A                   | N/A                   |

SR: standard risk  
MR: medium risk  
HR: high risk  
non-HR: non high risk  
VHR: very high risk

N/A: Not available
