# Supplementary material for: Repurposing anthelmintic agents to eradicate resistant leukemia
Source: PubMed Central journal article supplement (PMC7320149; doi:10.1038/s41408-020-0339-9), 2020-06-26
Supplement: 41408_2020_339_MOESM5_ESM.pdf [file 41408_2020_339_MOESM5_ESM.pdf]

**Supplementary Table S4:** Synergy values (Z-score) for combination of moxidectin and dexamethasone in B- and T-ALL samples

| <b>Sample</b> | <b>Z-score</b> | <b>Class</b> |
|---------------|----------------|--------------|
| B-VHR-10      | 22.893         | B-ALL        |
| B-VHR-12      | 20.233         | B-ALL        |
| B-R-03        | 15.074         | B-ALL        |
| B-R-03        | 15.029         | B-ALL        |
| B-SR-26       | 12.39          | B-ALL        |
| T-R-28        | 12.02          | T-ALL        |
| B-R-32        | 11.85          | B-ALL        |
| T-VHR-04      | 9.36           | T-ALL        |
| B-R-37        | 9.1            | B-ALL        |
| B-R-49        | 6.22           | B-ALL        |
| T-R-32        | 5.82           | T-ALL        |
| T-R-32        | 4.72           | B-ALL        |
| B-MR-04       | 3.69           | B-ALL        |
| T-R-30        | 3.58           | B-ALL        |
| B-R-27        | 2.63           | B-ALL        |
| B-VHR-01      | 2.44           | B-ALL        |
| B-R-29        | 1.25           | B-ALL        |
| T-non-HR-02   | 0.23           | T-ALL        |
| B-SR-23       | -2.81          | B-ALL        |
